# Supplementary material for: Taxi Efficiency Measurements Based on Motorcade-Sharing Model: Evidence from GPS-Equipped Taxi Data in Sanya
Source: Hindawi journal article supplement (doi:10.1155/2018/4360516), 2018-11-11
Supplement: f1 [file 4360516.f1.zip]

Archive with 3 entries (2 files):
- 4360516.f1/
- 4360516.f1/(i) Data.xlsx
- 4360516.f1/(ii) Programming.pdf
