# Supplementary material for: Taxi Efficiency Measurements Based on Motorcade-Sharing Model: Evidence from GPS-Equipped Taxi Data in Sanya
Source: Hindawi journal article supplement (doi:10.1155/2018/4360516), 2018-11-11
Supplement: f1 [file 4360516.f1.zip › 4360516.f1/(i) Data.xlsx]

## Sheet: Notes
	Notes: This file records 51 taxis(No.1-50,2191) of full data.
		This file		Full data
	Origin	16492	lines	766043	lines
	Actual	3062	lines	131461	lines
	Modeled	3062	lines	131461	lines
	Total	823	KB	32.7	MB

## Sheet: Downloaded
No	Time	Longitude	Latitude	Passenger
100100000001	2016-11-15 09:00:00	109.529	18.2953	0
100100000001	2016-11-15 09:00:00	109.528	18.2962	0
100100000001	2016-11-15 09:00:00	109.528	18.2972	0
100100000001	2016-11-15 09:00:00	109.528	18.2981	0
100100000001	2016-11-15 09:00:00	109.528	18.2986	0
100100000001	2016-11-15 09:00:00	109.528	18.299	0
100100000001	2016-11-15 09:01:00	109.528	18.2994	0
100100000001	2016-11-15 09:01:00	109.527	18.2995	0
100100000001	2016-11-15 09:01:00	109.527	18.2995	0
100100000001	2016-11-15 09:01:00	109.527	18.2995	0
100100000001	2016-11-15 09:01:00	109.527	18.2995	0
100100000001	2016-11-15 09:01:00	109.527	18.2995	0
100100000001	2016-11-15 09:02:00	109.527	18.2995	0
100100000001	2016-11-15 09:02:00	109.527	18.2995	0
100100000001	2016-11-15 09:02:00	109.527	18.2995	0
100100000001	2016-11-15 09:02:00	109.527	18.2995	0
100100000001	2016-11-15 09:02:00	109.527	18.2996	0
100100000001	2016-11-15 09:02:00	109.527	18.3004	0
100100000001	2016-11-15 09:03:00	109.527	18.3015	0
100100000001	2016-11-15 09:03:00	109.527	18.3032	0
100100000001	2016-11-15 09:03:00	109.527	18.3047	0
100100000001	2016-11-15 09:03:00	109.527	18.3059	0
100100000001	2016-11-15 09:03:00	109.527	18.3063	0
100100000001	2016-11-15 09:03:00	109.527	18.3068	0
100100000001	2016-11-15 09:04:00	109.527	18.3071	0
100100000001	2016-11-15 09:04:00	109.527	18.3074	0
100100000001	2016-11-15 09:04:00	109.527	18.308	0
100100000001	2016-11-15 09:04:00	109.527	18.3089	0
100100000001	2016-11-15 09:04:00	109.527	18.31	0
100100000001	2016-11-15 09:04:00	109.527	18.3108	0
100100000001	2016-11-15 09:05:00	109.527	18.3118	0
100100000001	2016-11-15 09:05:00	109.527	18.3128	0
100100000001	2016-11-15 09:05:00	109.527	18.3134	0
100100000001	2016-11-15 09:05:00	109.527	18.3139	0
100100000001	2016-11-15 09:05:00	109.527	18.314	0
100100000001	2016-11-15 09:05:00	109.528	18.3142	0
100100000001	2016-11-15 09:05:00	109.528	18.3146	0
100100000001	2016-11-15 09:06:00	109.529	18.3153	0
100100000001	2016-11-15 09:06:00	109.53	18.3155	0
100100000001	2016-11-15 09:06:00	109.531	18.3157	0
100100000001	2016-11-15 09:06:00	109.533	18.3158	0
100100000001	2016-11-15 09:06:00	109.535	18.316	0
100100000001	2016-11-15 09:06:00	109.538	18.3162	0
100100000001	2016-11-15 09:07:00	109.54	18.3164	0
100100000001	2016-11-15 09:07:00	109.543	18.3166	0
100100000001	2016-11-15 09:07:00	109.546	18.3171	0
100100000001	2016-11-15 09:07:00	109.548	18.3178	0
100100000001	2016-11-15 09:07:00	109.55	18.3186	0
100100000001	2016-11-15 09:07:00	109.552	18.3194	0
100100000001	2016-11-15 09:08:00	109.554	18.3202	0
100100000001	2016-11-15 09:08:00	109.557	18.3209	0
100100000001	2016-11-15 09:08:00	109.559	18.3212	0
100100000001	2016-11-15 09:08:00	109.561	18.3213	0
100100000001	2016-11-15 09:08:00	109.563	18.321	0
100100000001	2016-11-15 09:08:00	109.565	18.3205	0
100100000001	2016-11-15 09:09:00	109.568	18.3199	0
100100000001	2016-11-15 09:09:00	109.57	18.3195	0
100100000001	2016-11-15 09:09:00	109.572	18.3194	0
100100000001	2016-11-15 09:09:00	109.574	18.3195	0
100100000001	2016-11-15 09:09:00	109.575	18.3196	0
100100000001	2016-11-15 09:09:00	109.577	18.3197	0
100100000001	2016-11-15 09:10:00	109.579	18.3199	0
100100000001	2016-11-15 09:11:00	109.598	18.3229	0
100100000001	2016-11-15 09:11:00	109.599	18.3234	0
100100000001	2016-11-15 09:11:00	109.599	18.3234	0
100100000001	2016-11-15 09:11:00	109.599	18.3234	0
100100000001	2016-11-15 09:12:00	109.599	18.3234	0
100100000001	2016-11-15 09:12:00	109.599	18.3234	0
100100000001	2016-11-15 09:12:00	109.599	18.3234	0
100100000001	2016-11-15 09:12:00	109.599	18.3234	0
100100000001	2016-11-15 09:12:00	109.599	18.3234	0
100100000001	2016-11-15 09:12:00	109.61	18.3255	0
100100000001	2016-11-15 09:13:00	109.611	18.3254	0
100100000001	2016-11-15 09:13:00	109.613	18.3251	0
100100000001	2016-11-15 09:13:00	109.614	18.3248	0
100100000001	2016-11-15 09:13:00	109.615	18.3244	0
100100000001	2016-11-15 09:13:00	109.616	18.324	0
100100000001	2016-11-15 09:13:00	109.617	18.3236	0
100100000001	2016-11-15 09:14:00	109.619	18.323	0
100100000001	2016-11-15 09:14:00	109.621	18.3225	0
100100000001	2016-11-15 09:14:00	109.623	18.3224	0
100100000001	2016-11-15 09:14:00	109.626	18.3231	0
100100000001	2016-11-15 09:14:00	109.628	18.324	0
100100000001	2016-11-15 09:14:00	109.629	18.3248	0
100100000001	2016-11-15 09:15:00	109.631	18.3258	0
100100000001	2016-11-15 09:15:00	109.633	18.3267	0
100100000001	2016-11-15 09:15:00	109.634	18.3274	0
100100000001	2016-11-15 09:15:00	109.636	18.328	0
100100000001	2016-11-15 09:15:00	109.638	18.3285	0
100100000001	2016-11-15 09:15:00	109.64	18.329	0
100100000001	2016-11-15 09:16:00	109.641	18.3295	0
100100000001	2016-11-15 09:16:00	109.643	18.3301	0
100100000001	2016-11-15 09:16:00	109.645	18.3306	0
100100000001	2016-11-15 09:16:00	109.647	18.3308	0
100100000001	2016-11-15 09:16:00	109.648	18.3308	0
100100000001	2016-11-15 09:16:00	109.649	18.3306	0
100100000001	2016-11-15 09:17:00	109.65	18.3303	0
100100000001	2016-11-15 09:17:00	109.652	18.3297	0
100100000001	2016-11-15 09:17:00	109.653	18.329	0
100100000001	2016-11-15 09:17:00	109.653	18.3288	0
100100000001	2016-11-15 09:17:00	109.653	18.3288	0
100100000001	2016-11-15 09:17:00	109.653	18.3288	0
100100000001	2016-11-15 09:18:00	109.653	18.3288	0
100100000001	2016-11-15 09:18:00	109.653	18.3288	0
100100000001	2016-11-15 09:18:00	109.653	18.3288	0
100100000001	2016-11-15 09:18:00	109.653	18.3288	0
100100000001	2016-11-15 09:18:00	109.653	18.3288	0
100100000001	2016-11-15 09:18:00	109.664	18.3226	0
100100000001	2016-11-15 09:19:00	109.666	18.322	0
100100000001	2016-11-15 09:19:00	109.667	18.3215	0
100100000001	2016-11-15 09:19:00	109.669	18.321	0
100100000001	2016-11-15 09:19:00	109.672	18.321	0
100100000001	2016-11-15 09:19:00	109.674	18.3213	0
100100000001	2016-11-15 09:19:00	109.676	18.3221	0
100100000001	2016-11-15 09:20:00	109.679	18.3234	0
100100000001	2016-11-15 09:20:00	109.681	18.3252	0
100100000001	2016-11-15 09:20:00	109.683	18.327	0
100100000001	2016-11-15 09:20:00	109.685	18.3286	0
100100000001	2016-11-15 09:20:00	109.686	18.33	0
100100000001	2016-11-15 09:20:00	109.688	18.3316	0
100100000001	2016-11-15 09:21:00	109.69	18.3336	0
100100000001	2016-11-15 09:21:00	109.692	18.3355	0
100100000001	2016-11-15 09:21:00	109.694	18.3376	0
100100000001	2016-11-15 09:21:00	109.696	18.3398	0
100100000001	2016-11-15 09:21:00	109.698	18.3419	0
100100000001	2016-11-15 09:21:00	109.699	18.3437	0
100100000001	2016-11-15 09:22:00	109.7	18.3455	0
100100000001	2016-11-15 09:22:00	109.701	18.3475	0
100100000001	2016-11-15 09:22:00	109.702	18.3497	0
100100000001	2016-11-15 09:22:00	109.703	18.3519	0
100100000001	2016-11-15 09:22:00	109.704	18.3538	0
100100000001	2016-11-15 09:22:00	109.705	18.3556	0
100100000001	2016-11-15 09:23:00	109.706	18.3577	0
100100000001	2016-11-15 09:23:00	109.707	18.36	0
100100000001	2016-11-15 09:23:00	109.708	18.3621	0
100100000001	2016-11-15 09:23:00	109.709	18.3642	0
100100000001	2016-11-15 09:23:00	109.71	18.3663	0
100100000001	2016-11-15 09:23:00	109.711	18.3685	0
100100000001	2016-11-15 09:24:00	109.713	18.3708	0
100100000001	2016-11-15 09:24:00	109.714	18.3725	0
100100000001	2016-11-15 09:24:00	109.716	18.3743	0
100100000001	2016-11-15 09:24:00	109.717	18.3756	0
100100000001	2016-11-15 09:24:00	109.719	18.3771	0
100100000001	2016-11-15 09:24:00	109.72	18.3782	0
100100000001	2016-11-15 09:25:00	109.722	18.3797	0
100100000001	2016-11-15 09:25:00	109.723	18.3809	0
100100000001	2016-11-15 09:25:00	109.725	18.3822	0
100100000001	2016-11-15 09:25:00	109.726	18.3834	0
100100000001	2016-11-15 09:25:00	109.728	18.3837	0
100100000001	2016-11-15 09:25:00	109.729	18.3841	0
100100000001	2016-11-15 09:26:00	109.728	18.3851	0
100100000001	2016-11-15 09:26:00	109.728	18.3866	0
100100000001	2016-11-15 09:26:00	109.728	18.3881	0
100100000001	2016-11-15 09:26:00	109.729	18.389	0
100100000001	2016-11-15 09:26:00	109.731	18.3899	0
100100000001	2016-11-15 09:26:00	109.732	18.3909	0
100100000001	2016-11-15 09:27:00	109.733	18.3919	0
100100000001	2016-11-15 09:27:00	109.734	18.3918	0
100100000001	2016-11-15 09:27:00	109.735	18.3912	0
100100000001	2016-11-15 09:27:00	109.735	18.3911	0
100100000001	2016-11-15 09:27:00	109.736	18.3916	0
100100000001	2016-11-15 09:27:00	109.737	18.3923	0
100100000001	2016-11-15 09:27:00	109.738	18.3928	0
100100000001	2016-11-15 09:28:00	109.738	18.3932	0
100100000001	2016-11-15 09:28:00	109.739	18.3937	0
100100000001	2016-11-15 09:28:00	109.74	18.3945	0
100100000001	2016-11-15 09:28:00	109.741	18.3953	0
100100000001	2016-11-15 09:28:00	109.741	18.3962	0
100100000001	2016-11-15 09:28:00	109.742	18.3967	0
100100000001	2016-11-15 09:29:00	109.742	18.3974	0
100100000001	2016-11-15 09:29:00	109.743	18.3981	0
100100000001	2016-11-15 09:29:00	109.744	18.3988	0
100100000001	2016-11-15 09:29:00	109.744	18.3995	0
100100000001	2016-11-15 09:29:00	109.745	18.4001	0
100100000001	2016-11-15 09:29:00	109.745	18.4004	0
100100000001	2016-11-15 09:30:00	109.745	18.4004	0
100100000001	2016-11-15 09:30:00	109.746	18.4006	0
100100000001	2016-11-15 09:30:00	109.746	18.401	0
100100000001	2016-11-15 09:30:00	109.747	18.4013	0
100100000001	2016-11-15 09:30:00	109.748	18.4016	0
100100000001	2016-11-15 09:30:00	109.748	18.4018	0
100100000001	2016-11-15 09:31:00	109.748	18.4019	0
100100000001	2016-11-15 09:31:00	109.749	18.4021	0
100100000001	2016-11-15 09:31:00	109.749	18.4023	0
100100000001	2016-11-15 09:31:00	109.749	18.4024	0
100100000001	2016-11-15 09:31:00	109.749	18.4025	0
100100000001	2016-11-15 09:31:00	109.749	18.4027	0
100100000001	2016-11-15 09:32:00	109.75	18.403	0
100100000001	2016-11-15 09:32:00	109.75	18.4033	0
100100000001	2016-11-15 09:32:00	109.751	18.4037	0
100100000001	2016-11-15 09:32:00	109.751	18.4043	0
100100000001	2016-11-15 09:32:00	109.751	18.4051	0
100100000001	2016-11-15 09:32:00	109.751	18.4059	0
100100000001	2016-11-15 09:33:00	109.751	18.4066	0
100100000001	2016-11-15 09:33:00	109.752	18.4073	0
100100000001	2016-11-15 09:33:00	109.752	18.4083	0
100100000001	2016-11-15 09:33:00	109.752	18.4088	0
100100000001	2016-11-15 09:33:00	109.753	18.4091	0
100100000001	2016-11-15 09:33:00	109.753	18.409	0
100100000001	2016-11-15 09:34:00	109.754	18.4088	0
100100000001	2016-11-15 09:34:00	109.755	18.4088	0
100100000001	2016-11-15 09:34:00	109.756	18.4087	0
100100000001	2016-11-15 09:34:00	109.756	18.4087	0
100100000001	2016-11-15 09:34:00	109.757	18.4088	0
100100000001	2016-11-15 09:34:00	109.757	18.4089	0
100100000001	2016-11-15 09:35:00	109.757	18.409	0
100100000001	2016-11-15 09:35:00	109.757	18.409	0
100100000001	2016-11-15 09:35:00	109.757	18.409	0
100100000001	2016-11-15 09:35:00	109.757	18.409	0
100100000001	2016-11-15 09:35:00	109.757	18.409	0
100100000001	2016-11-15 09:35:00	109.757	18.409	0
100100000001	2016-11-15 09:36:00	109.757	18.409	0
100100000001	2016-11-15 09:36:00	109.757	18.4092	0
100100000001	2016-11-15 09:36:00	109.758	18.4095	0
100100000001	2016-11-15 09:36:00	109.758	18.4097	0
100100000001	2016-11-15 09:36:00	109.758	18.4099	0
100100000001	2016-11-15 09:36:00	109.758	18.4102	0
100100000001	2016-11-15 09:37:00	109.758	18.4103	0
100100000001	2016-11-15 09:37:00	109.758	18.4103	0
100100000001	2016-11-15 09:37:00	109.758	18.4103	0
100100000001	2016-11-15 09:37:00	109.758	18.4103	0
100100000001	2016-11-15 09:37:00	109.758	18.4102	0
100100000001	2016-11-15 09:37:00	109.758	18.4101	0
100100000001	2016-11-15 09:38:00	109.758	18.4099	0
100100000001	2016-11-15 09:38:00	109.758	18.4096	0
100100000001	2016-11-15 09:38:00	109.757	18.4092	0
100100000001	2016-11-15 09:38:00	109.757	18.409	0
100100000001	2016-11-15 09:38:00	109.757	18.4089	0
100100000001	2016-11-15 09:38:00	109.757	18.4089	0
100100000001	2016-11-15 09:39:00	109.757	18.4089	0
100100000001	2016-11-15 09:39:00	109.757	18.4089	0
100100000001	2016-11-15 09:39:00	109.757	18.4089	0
100100000001	2016-11-15 09:39:00	109.757	18.4089	0
100100000001	2016-11-15 09:39:00	109.757	18.4089	0
100100000001	2016-11-15 09:39:00	109.757	18.4089	0
100100000001	2016-11-15 09:40:00	109.757	18.4089	0
100100000001	2016-11-15 09:40:00	109.757	18.4089	0
100100000001	2016-11-15 09:40:00	109.757	18.4089	0
100100000001	2016-11-15 09:40:00	109.757	18.4089	0
100100000001	2016-11-15 09:40:00	109.757	18.4089	0
100100000001	2016-11-15 09:40:00	109.757	18.4089	0
100100000001	2016-11-15 09:41:00	109.757	18.4089	0
100100000001	2016-11-15 09:41:00	109.757	18.4089	0
100100000001	2016-11-15 09:41:00	109.757	18.4089	0
100100000001	2016-11-15 09:41:00	109.757	18.4089	0
100100000001	2016-11-15 09:41:00	109.757	18.4089	0
100100000001	2016-11-15 09:41:00	109.757	18.4089	0
100100000001	2016-11-15 09:42:00	109.756	18.4088	0
100100000001	2016-11-15 09:42:00	109.756	18.4087	0
100100000001	2016-11-15 09:42:00	109.755	18.4088	0
100100000001	2016-11-15 09:42:00	109.755	18.4088	0
100100000001	2016-11-15 09:42:00	109.754	18.4089	0
100100000001	2016-11-15 09:42:00	109.753	18.409	0
100100000001	2016-11-15 09:43:00	109.753	18.4091	0
100100000001	2016-11-15 09:43:00	109.752	18.4091	0
100100000001	2016-11-15 09:43:00	109.752	18.4087	0
100100000001	2016-11-15 09:43:00	109.752	18.408	0
100100000001	2016-11-15 09:43:00	109.752	18.4073	0
100100000001	2016-11-15 09:43:00	109.751	18.4065	0
100100000001	2016-11-15 09:44:00	109.751	18.4059	0
100100000001	2016-11-15 09:44:00	109.751	18.405	0
100100000001	2016-11-15 09:44:00	109.751	18.4042	0
100100000001	2016-11-15 09:44:00	109.75	18.4035	0
100100000001	2016-11-15 09:44:00	109.75	18.403	0
100100000001	2016-11-15 09:44:00	109.749	18.4026	0
100100000001	2016-11-15 09:45:00	109.749	18.4023	0
100100000001	2016-11-15 09:45:00	109.748	18.4021	0
100100000001	2016-11-15 09:45:00	109.748	18.4018	0
100100000001	2016-11-15 09:45:00	109.748	18.4017	0
100100000001	2016-11-15 09:45:00	109.747	18.4015	0
100100000001	2016-11-15 09:45:00	109.747	18.4012	0
100100000001	2016-11-15 09:46:00	109.746	18.4008	0
100100000001	2016-11-15 09:46:00	109.745	18.4005	0
100100000001	2016-11-15 09:46:00	109.745	18.4005	0
100100000001	2016-11-15 09:46:00	109.745	18.4004	0
100100000001	2016-11-15 09:46:00	109.745	18.4004	0
100100000001	2016-11-15 09:46:00	109.745	18.4004	0
100100000001	2016-11-15 09:47:00	109.745	18.4004	0
100100000001	2016-11-15 09:47:00	109.745	18.4004	0
100100000001	2016-11-15 09:47:00	109.745	18.4004	0
100100000001	2016-11-15 09:47:00	109.745	18.4004	0
100100000001	2016-11-15 09:47:00	109.745	18.4003	0
100100000001	2016-11-15 09:47:00	109.745	18.4	0
100100000001	2016-11-15 09:48:00	109.744	18.3996	0
100100000001	2016-11-15 09:48:00	109.744	18.3994	0
100100000001	2016-11-15 09:48:00	109.744	18.3992	0
100100000001	2016-11-15 09:48:00	109.744	18.3991	0
100100000001	2016-11-15 09:48:00	109.744	18.399	0
100100000001	2016-11-15 09:48:00	109.744	18.399	0
100100000001	2016-11-15 09:49:00	109.744	18.399	0
100100000001	2016-11-15 09:49:00	109.743	18.3985	0
100100000001	2016-11-15 09:49:00	109.743	18.398	0
100100000001	2016-11-15 09:49:00	109.742	18.3976	0
100100000001	2016-11-15 09:49:00	109.742	18.3976	0
100100000001	2016-11-15 09:49:00	109.742	18.3976	0
100100000001	2016-11-15 09:50:00	109.742	18.3976	0
100100000001	2016-11-15 09:50:00	109.742	18.3976	0
100100000001	2016-11-15 09:50:00	109.742	18.3976	0
100100000001	2016-11-15 09:50:00	109.742	18.3976	0
100100000001	2016-11-15 09:50:00	109.742	18.3976	0
100100000001	2016-11-15 09:50:00	109.742	18.3976	0
100100000001	2016-11-15 09:51:00	109.742	18.3976	0
100100000001	2016-11-15 09:51:00	109.742	18.3975	0
100100000001	2016-11-15 09:51:00	109.742	18.3975	0
100100000001	2016-11-15 09:51:00	109.742	18.3975	0
100100000001	2016-11-15 09:51:00	109.742	18.3975	0
100100000001	2016-11-15 09:51:00	109.742	18.3975	0
100100000001	2016-11-15 09:52:00	109.742	18.3975	0
100100000001	2016-11-15 09:52:00	109.742	18.3975	0
100100000001	2016-11-15 09:52:00	109.742	18.3975	0
100100000001	2016-11-15 09:52:00	109.742	18.3975	0
100100000001	2016-11-15 09:53:00	109.742	18.3975	0
100100000001	2016-11-15 09:53:00	109.742	18.3975	0
100100000001	2016-11-15 09:53:00	109.742	18.3975	0
100100000001	2016-11-15 09:53:00	109.742	18.3975	1
100100000001	2016-11-15 09:53:00	109.742	18.397	1
100100000001	2016-11-15 09:53:00	109.741	18.3965	1
100100000001	2016-11-15 09:54:00	109.741	18.396	1
100100000001	2016-11-15 09:54:00	109.74	18.3952	1
100100000001	2016-11-15 09:54:00	109.74	18.3943	1
100100000001	2016-11-15 09:54:00	109.739	18.3937	1
100100000001	2016-11-15 09:54:00	109.738	18.3931	1
100100000001	2016-11-15 09:54:00	109.738	18.3928	1
100100000001	2016-11-15 09:55:00	109.737	18.3924	1
100100000001	2016-11-15 09:55:00	109.736	18.392	1
100100000001	2016-11-15 09:55:00	109.736	18.3916	1
100100000001	2016-11-15 09:55:00	109.735	18.3912	1
100100000001	2016-11-15 09:55:00	109.735	18.3913	1
100100000001	2016-11-15 09:55:00	109.734	18.392	1
100100000001	2016-11-15 09:55:00	109.734	18.392	1
100100000001	2016-11-15 09:56:00	109.733	18.3914	1
100100000001	2016-11-15 09:56:00	109.731	18.3904	1
100100000001	2016-11-15 09:56:00	109.73	18.3898	1
100100000001	2016-11-15 09:56:00	109.729	18.389	1
100100000001	2016-11-15 09:56:00	109.728	18.388	1
100100000001	2016-11-15 09:56:00	109.728	18.3865	1
100100000001	2016-11-15 09:57:00	109.727	18.3853	1
100100000001	2016-11-15 09:57:00	109.726	18.3838	1
100100000001	2016-11-15 09:57:00	109.725	18.3826	1
100100000001	2016-11-15 09:57:00	109.724	18.3812	1
100100000001	2016-11-15 09:57:00	109.722	18.3797	1
100100000001	2016-11-15 09:57:00	109.72	18.3781	1
100100000001	2016-11-15 09:58:00	109.718	18.3764	1
100100000001	2016-11-15 09:58:00	109.716	18.3747	1
100100000001	2016-11-15 09:58:00	109.714	18.3729	1
100100000001	2016-11-15 09:58:00	109.713	18.371	1
100100000001	2016-11-15 09:58:00	109.711	18.3688	1
100100000001	2016-11-15 09:58:00	109.71	18.3664	1
100100000001	2016-11-15 09:59:00	109.709	18.3638	1
100100000001	2016-11-15 09:59:00	109.708	18.361	1
100100000001	2016-11-15 09:59:00	109.706	18.3584	1
100100000001	2016-11-15 09:59:00	109.705	18.3559	1
100100000001	2016-11-15 09:59:00	109.704	18.3534	1
100100000001	2016-11-15 09:59:00	109.703	18.351	1
100100000002	2016-11-15 09:00:00	109.504	18.291	1
100100000002	2016-11-15 09:00:00	109.504	18.291	1
100100000002	2016-11-15 09:00:00	109.504	18.291	1
100100000002	2016-11-15 09:00:00	109.504	18.2909	1
100100000002	2016-11-15 09:00:00	109.503	18.2905	1
100100000002	2016-11-15 09:00:00	109.502	18.2899	1
100100000002	2016-11-15 09:01:00	109.502	18.2891	1
100100000002	2016-11-15 09:01:00	109.501	18.2884	1
100100000002	2016-11-15 09:01:00	109.5	18.2878	1
100100000002	2016-11-15 09:01:00	109.5	18.2876	1
100100000002	2016-11-15 09:01:00	109.499	18.2876	1
100100000002	2016-11-15 09:01:00	109.499	18.2882	1
100100000002	2016-11-15 09:02:00	109.498	18.2888	1
100100000002	2016-11-15 09:02:00	109.497	18.2892	1
100100000002	2016-11-15 09:02:00	109.497	18.2893	1
100100000002	2016-11-15 09:02:00	109.496	18.2893	1
100100000002	2016-11-15 09:02:00	109.496	18.2893	1
100100000002	2016-11-15 09:02:00	109.495	18.2893	1
100100000002	2016-11-15 09:03:00	109.494	18.2893	1
100100000002	2016-11-15 09:03:00	109.493	18.2893	1
100100000002	2016-11-15 09:03:00	109.492	18.2893	1
100100000002	2016-11-15 09:03:00	109.49	18.2894	1
100100000002	2016-11-15 09:03:00	109.488	18.2894	1
100100000002	2016-11-15 09:03:00	109.486	18.2894	1
100100000002	2016-11-15 09:04:00	109.485	18.2895	1
100100000002	2016-11-15 09:04:00	109.485	18.2895	1
100100000002	2016-11-15 09:04:00	109.485	18.2898	1
100100000002	2016-11-15 09:04:00	109.484	18.2909	1
100100000002	2016-11-15 09:04:00	109.484	18.2918	1
100100000002	2016-11-15 09:04:00	109.484	18.2926	1
100100000002	2016-11-15 09:04:00	109.484	18.2934	1
100100000002	2016-11-15 09:05:00	109.484	18.2943	1
100100000002	2016-11-15 09:05:00	109.483	18.2954	1
100100000002	2016-11-15 09:05:00	109.483	18.2962	1
100100000002	2016-11-15 09:05:00	109.484	18.2962	1
100100000002	2016-11-15 09:05:00	109.486	18.2961	1
100100000002	2016-11-15 09:05:00	109.486	18.2961	1
100100000002	2016-11-15 09:06:00	109.487	18.2962	1
100100000002	2016-11-15 09:06:00	109.488	18.2962	1
100100000002	2016-11-15 09:06:00	109.489	18.2963	1
100100000002	2016-11-15 09:06:00	109.49	18.2964	1
100100000002	2016-11-15 09:06:00	109.49	18.2965	1
100100000002	2016-11-15 09:07:00	109.489	18.2974	1
100100000002	2016-11-15 09:07:00	109.489	18.2974	0
100100000002	2016-11-15 09:07:00	109.489	18.2974	0
100100000002	2016-11-15 09:07:00	109.489	18.2974	0
100100000002	2016-11-15 09:07:00	109.489	18.2974	0
100100000002	2016-11-15 09:08:00	109.489	18.2974	0
100100000002	2016-11-15 09:08:00	109.489	18.2974	0
100100000002	2016-11-15 09:08:00	109.489	18.2974	0
100100000002	2016-11-15 09:08:00	109.489	18.2974	0
100100000002	2016-11-15 09:08:00	109.489	18.2974	0
100100000002	2016-11-15 09:08:00	109.489	18.2974	0
100100000002	2016-11-15 09:09:00	109.489	18.2974	0
100100000002	2016-11-15 09:09:00	109.489	18.2974	0
100100000002	2016-11-15 09:09:00	109.489	18.2974	0
100100000002	2016-11-15 09:09:00	109.489	18.2974	0
100100000002	2016-11-15 09:09:00	109.489	18.2974	0
100100000002	2016-11-15 09:09:00	109.489	18.2974	0
100100000002	2016-11-15 09:10:00	109.489	18.2974	0
100100000002	2016-11-15 09:10:00	109.489	18.2974	0
100100000002	2016-11-15 09:10:00	109.489	18.2974	0
100100000002	2016-11-15 09:10:00	109.489	18.2974	0
100100000002	2016-11-15 09:10:00	109.489	18.2974	0
100100000002	2016-11-15 09:10:00	109.489	18.2974	0
100100000002	2016-11-15 09:11:00	109.489	18.2974	0
100100000002	2016-11-15 09:11:00	109.489	18.2974	0
100100000002	2016-11-15 09:11:00	109.489	18.2974	0
100100000002	2016-11-15 09:11:00	109.489	18.2974	0
100100000002	2016-11-15 09:11:00	109.489	18.2974	0
100100000002	2016-11-15 09:11:00	109.489	18.2974	0
100100000002	2016-11-15 09:12:00	109.489	18.2974	0
100100000002	2016-11-15 09:12:00	109.489	18.2975	0
100100000002	2016-11-15 09:12:00	109.489	18.2975	0
100100000002	2016-11-15 09:12:00	109.489	18.2975	0
100100000002	2016-11-15 09:12:00	109.489	18.2975	0
100100000002	2016-11-15 09:12:00	109.489	18.2975	0
100100000002	2016-11-15 09:13:00	109.489	18.2975	0
100100000002	2016-11-15 09:13:00	109.489	18.2975	0
100100000002	2016-11-15 09:13:00	109.489	18.2975	0
100100000002	2016-11-15 09:13:00	109.489	18.2975	0
100100000002	2016-11-15 09:13:00	109.489	18.2975	0
100100000002	2016-11-15 09:13:00	109.489	18.2975	0
100100000002	2016-11-15 09:14:00	109.489	18.2974	0
100100000002	2016-11-15 09:14:00	109.489	18.2974	0
100100000002	2016-11-15 09:14:00	109.489	18.2974	0
100100000002	2016-11-15 09:14:00	109.489	18.2974	0
100100000002	2016-11-15 09:14:00	109.489	18.2974	0
100100000002	2016-11-15 09:14:00	109.489	18.2974	0
100100000002	2016-11-15 09:15:00	109.489	18.2974	0
100100000002	2016-11-15 09:15:00	109.489	18.2974	0
100100000002	2016-11-15 09:15:00	109.489	18.2974	0
100100000002	2016-11-15 09:15:00	109.489	18.2974	0
100100000002	2016-11-15 09:15:00	109.489	18.2974	0
100100000002	2016-11-15 09:15:00	109.489	18.2974	0
100100000002	2016-11-15 09:16:00	109.489	18.2974	0
100100000002	2016-11-15 09:16:00	109.489	18.2974	0
100100000002	2016-11-15 09:16:00	109.489	18.2974	0
100100000002	2016-11-15 09:16:00	109.489	18.2974	0
100100000002	2016-11-15 09:16:00	109.489	18.2974	0
100100000002	2016-11-15 09:16:00	109.489	18.2974	0
100100000002	2016-11-15 09:17:00	109.489	18.2974	0
100100000002	2016-11-15 09:17:00	109.489	18.2974	0
100100000002	2016-11-15 09:17:00	109.489	18.2974	0
100100000002	2016-11-15 09:17:00	109.489	18.2974	0
100100000002	2016-11-15 09:17:00	109.489	18.2974	0
100100000002	2016-11-15 09:17:00	109.489	18.2974	0
100100000002	2016-11-15 09:18:00	109.489	18.2974	0
100100000002	2016-11-15 09:18:00	109.489	18.2974	0
100100000002	2016-11-15 09:18:00	109.489	18.2974	0
100100000002	2016-11-15 09:18:00	109.489	18.2974	0
100100000002	2016-11-15 09:18:00	109.489	18.2974	0
100100000002	2016-11-15 09:18:00	109.489	18.2974	0
100100000002	2016-11-15 09:19:00	109.489	18.2974	0
100100000002	2016-11-15 09:19:00	109.489	18.2974	0
100100000002	2016-11-15 09:19:00	109.489	18.2974	0
100100000002	2016-11-15 09:19:00	109.489	18.2974	0
100100000002	2016-11-15 09:19:00	109.489	18.2974	0
100100000002	2016-11-15 09:19:00	109.489	18.2974	0
100100000002	2016-11-15 09:20:00	109.489	18.2974	0
100100000002	2016-11-15 09:20:00	109.489	18.2974	0
100100000002	2016-11-15 09:20:00	109.489	18.2974	0
100100000002	2016-11-15 09:20:00	109.489	18.2974	0
100100000002	2016-11-15 09:20:00	109.489	18.2974	0
100100000002	2016-11-15 09:20:00	109.489	18.2974	0
100100000002	2016-11-15 09:21:00	109.489	18.2974	0
100100000002	2016-11-15 09:21:00	109.489	18.2974	0
100100000002	2016-11-15 09:21:00	109.489	18.2974	0
100100000002	2016-11-15 09:21:00	109.489	18.2974	0
100100000002	2016-11-15 09:21:00	109.489	18.2974	0
100100000002	2016-11-15 09:21:00	109.489	18.2974	0
100100000002	2016-11-15 09:22:00	109.489	18.2974	0
100100000002	2016-11-15 09:22:00	109.489	18.2974	0
100100000002	2016-11-15 09:22:00	109.488	18.2974	0
100100000002	2016-11-15 09:22:00	109.488	18.2974	0
100100000002	2016-11-15 09:22:00	109.488	18.2974	0
100100000002	2016-11-15 09:22:00	109.488	18.2974	0
100100000002	2016-11-15 09:23:00	109.488	18.2974	0
100100000002	2016-11-15 09:23:00	109.488	18.2974	0
100100000002	2016-11-15 09:23:00	109.488	18.2974	0
100100000002	2016-11-15 09:23:00	109.488	18.2974	0
100100000002	2016-11-15 09:23:00	109.488	18.2974	0
100100000002	2016-11-15 09:23:00	109.488	18.2974	0
100100000002	2016-11-15 09:24:00	109.488	18.2974	0
100100000002	2016-11-15 09:24:00	109.488	18.2974	0
100100000002	2016-11-15 09:24:00	109.488	18.2974	0
100100000002	2016-11-15 09:24:00	109.488	18.2974	1
100100000002	2016-11-15 09:24:00	109.488	18.2975	1
100100000002	2016-11-15 09:24:00	109.488	18.2973	1
100100000002	2016-11-15 09:25:00	109.488	18.2966	1
100100000002	2016-11-15 09:25:00	109.488	18.2962	1
100100000002	2016-11-15 09:25:00	109.487	18.2962	1
100100000002	2016-11-15 09:25:00	109.485	18.2962	1
100100000002	2016-11-15 09:25:00	109.485	18.2962	1
100100000002	2016-11-15 09:25:00	109.484	18.2962	1
100100000002	2016-11-15 09:26:00	109.483	18.2962	1
100100000002	2016-11-15 09:26:00	109.483	18.2962	1
100100000002	2016-11-15 09:26:00	109.483	18.2962	1
100100000002	2016-11-15 09:26:00	109.483	18.2962	1
100100000002	2016-11-15 09:26:00	109.483	18.2962	1
100100000002	2016-11-15 09:26:00	109.483	18.2962	1
100100000002	2016-11-15 09:27:00	109.483	18.2962	1
100100000002	2016-11-15 09:27:00	109.483	18.296	1
100100000002	2016-11-15 09:27:00	109.483	18.2953	1
100100000002	2016-11-15 09:27:00	109.484	18.294	1
100100000002	2016-11-15 09:27:00	109.484	18.2928	1
100100000002	2016-11-15 09:27:00	109.484	18.2918	1
100100000002	2016-11-15 09:27:00	109.484	18.2906	1
100100000002	2016-11-15 09:28:00	109.484	18.2899	1
100100000002	2016-11-15 09:28:00	109.484	18.2898	1
100100000002	2016-11-15 09:28:00	109.485	18.2892	1
100100000002	2016-11-15 09:28:00	109.485	18.2884	1
100100000002	2016-11-15 09:28:00	109.485	18.2877	1
100100000002	2016-11-15 09:28:00	109.486	18.2872	1
100100000002	2016-11-15 09:29:00	109.486	18.2865	1
100100000002	2016-11-15 09:29:00	109.487	18.2857	1
100100000002	2016-11-15 09:29:00	109.487	18.2849	1
100100000002	2016-11-15 09:29:00	109.488	18.2843	1
100100000002	2016-11-15 09:29:00	109.489	18.2838	1
100100000002	2016-11-15 09:29:00	109.49	18.2832	1
100100000002	2016-11-15 09:30:00	109.49	18.2827	1
100100000002	2016-11-15 09:30:00	109.491	18.2821	1
100100000002	2016-11-15 09:30:00	109.491	18.2814	1
100100000002	2016-11-15 09:30:00	109.492	18.2805	1
100100000002	2016-11-15 09:30:00	109.492	18.2799	1
100100000002	2016-11-15 09:30:00	109.492	18.2794	1
100100000002	2016-11-15 09:31:00	109.492	18.2787	1
100100000002	2016-11-15 09:31:00	109.491	18.2778	1
100100000002	2016-11-15 09:31:00	109.491	18.2768	1
100100000002	2016-11-15 09:31:00	109.491	18.2764	1
100100000002	2016-11-15 09:31:00	109.49	18.2764	1
100100000002	2016-11-15 09:31:00	109.49	18.2761	1
100100000002	2016-11-15 09:32:00	109.49	18.2754	1
100100000002	2016-11-15 09:32:00	109.489	18.2746	1
100100000002	2016-11-15 09:32:00	109.489	18.2739	1
100100000002	2016-11-15 09:32:00	109.488	18.2734	1
100100000002	2016-11-15 09:32:00	109.488	18.273	1
100100000002	2016-11-15 09:32:00	109.487	18.2729	1
100100000002	2016-11-15 09:33:00	109.487	18.2731	1
100100000002	2016-11-15 09:33:00	109.487	18.273	1
100100000002	2016-11-15 09:33:00	109.487	18.2726	1
100100000002	2016-11-15 09:33:00	109.487	18.272	1
100100000002	2016-11-15 09:33:00	109.486	18.2715	1
100100000002	2016-11-15 09:33:00	109.486	18.271	1
100100000002	2016-11-15 09:33:00	109.486	18.2708	1
100100000002	2016-11-15 09:33:00	109.486	18.2704	1
100100000002	2016-11-15 09:34:00	109.487	18.2699	1
100100000002	2016-11-15 09:34:00	109.487	18.2695	1
100100000002	2016-11-15 09:34:00	109.487	18.2693	1
100100000002	2016-11-15 09:34:00	109.487	18.2691	1
100100000002	2016-11-15 09:34:00	109.487	18.2691	1
100100000002	2016-11-15 09:34:00	109.487	18.2692	1
100100000002	2016-11-15 09:35:00	109.487	18.2691	1
100100000002	2016-11-15 09:35:00	109.487	18.269	1
100100000002	2016-11-15 09:35:00	109.487	18.2692	1
100100000002	2016-11-15 09:35:00	109.487	18.2692	1
100100000002	2016-11-15 09:35:00	109.486	18.2693	1
100100000002	2016-11-15 09:35:00	109.486	18.2693	1
100100000002	2016-11-15 09:35:00	109.486	18.269	1
100100000002	2016-11-15 09:36:00	109.486	18.2688	1
100100000002	2016-11-15 09:36:00	109.486	18.2686	1
100100000002	2016-11-15 09:36:00	109.486	18.2684	1
100100000002	2016-11-15 09:36:00	109.487	18.2682	1
100100000002	2016-11-15 09:36:00	109.487	18.2683	1
100100000002	2016-11-15 09:36:00	109.487	18.2684	1
100100000002	2016-11-15 09:36:00	109.487	18.2684	1
100100000002	2016-11-15 09:37:00	109.487	18.2684	1
100100000002	2016-11-15 09:37:00	109.487	18.2684	1
100100000002	2016-11-15 09:37:00	109.487	18.2684	1
100100000002	2016-11-15 09:37:00	109.487	18.2684	1
100100000002	2016-11-15 09:37:00	109.487	18.2684	1
100100000002	2016-11-15 09:37:00	109.487	18.2684	1
100100000002	2016-11-15 09:38:00	109.487	18.2684	1
100100000002	2016-11-15 09:38:00	109.487	18.2682	0
100100000002	2016-11-15 09:38:00	109.487	18.2682	0
100100000002	2016-11-15 09:38:00	109.488	18.2686	0
100100000002	2016-11-15 09:38:00	109.487	18.269	0
100100000002	2016-11-15 09:38:00	109.487	18.2692	0
100100000002	2016-11-15 09:38:00	109.487	18.2692	0
100100000002	2016-11-15 09:38:00	109.487	18.2694	0
100100000002	2016-11-15 09:39:00	109.487	18.2695	0
100100000002	2016-11-15 09:39:00	109.487	18.2698	0
100100000002	2016-11-15 09:39:00	109.487	18.2703	0
100100000002	2016-11-15 09:39:00	109.486	18.2706	0
100100000002	2016-11-15 09:39:00	109.486	18.2708	0
100100000002	2016-11-15 09:39:00	109.486	18.2708	0
100100000002	2016-11-15 09:40:00	109.486	18.2708	0
100100000002	2016-11-15 09:40:00	109.486	18.2708	0
100100000002	2016-11-15 09:40:00	109.486	18.2708	0
100100000002	2016-11-15 09:40:00	109.485	18.2704	0
100100000002	2016-11-15 09:40:00	109.485	18.2698	0
100100000002	2016-11-15 09:40:00	109.484	18.2689	0
100100000002	2016-11-15 09:41:00	109.483	18.2684	0
100100000002	2016-11-15 09:41:00	109.483	18.2683	0
100100000002	2016-11-15 09:41:00	109.483	18.2683	0
100100000002	2016-11-15 09:41:00	109.483	18.2683	0
100100000002	2016-11-15 09:41:00	109.483	18.2683	0
100100000002	2016-11-15 09:41:00	109.483	18.268	0
100100000002	2016-11-15 09:42:00	109.484	18.2675	0
100100000002	2016-11-15 09:42:00	109.484	18.2671	0
100100000002	2016-11-15 09:42:00	109.485	18.2663	0
100100000002	2016-11-15 09:42:00	109.486	18.2657	0
100100000002	2016-11-15 09:42:00	109.486	18.265	0
100100000002	2016-11-15 09:42:00	109.487	18.2642	0
100100000002	2016-11-15 09:43:00	109.488	18.2636	0
100100000002	2016-11-15 09:43:00	109.488	18.2633	0
100100000002	2016-11-15 09:43:00	109.489	18.2629	0
100100000002	2016-11-15 09:43:00	109.489	18.2627	0
100100000002	2016-11-15 09:43:00	109.489	18.2627	1
100100000002	2016-11-15 09:43:00	109.489	18.2627	1
100100000002	2016-11-15 09:43:00	109.489	18.2623	1
100100000002	2016-11-15 09:44:00	109.49	18.2618	1
100100000002	2016-11-15 09:44:00	109.49	18.2617	1
100100000002	2016-11-15 09:44:00	109.49	18.2616	1
100100000002	2016-11-15 09:44:00	109.491	18.2614	1
100100000002	2016-11-15 09:44:00	109.491	18.262	1
100100000002	2016-11-15 09:44:00	109.492	18.2627	1
100100000002	2016-11-15 09:45:00	109.493	18.2633	1
100100000002	2016-11-15 09:45:00	109.493	18.2635	1
100100000002	2016-11-15 09:45:00	109.493	18.2638	1
100100000002	2016-11-15 09:45:00	109.494	18.2643	1
100100000002	2016-11-15 09:45:00	109.494	18.2646	1
100100000002	2016-11-15 09:45:00	109.494	18.2647	1
100100000002	2016-11-15 09:46:00	109.494	18.2647	1
100100000002	2016-11-15 09:46:00	109.494	18.2647	1
100100000002	2016-11-15 09:46:00	109.494	18.2647	1
100100000002	2016-11-15 09:46:00	109.494	18.2647	1
100100000002	2016-11-15 09:46:00	109.494	18.2647	1
100100000002	2016-11-15 09:46:00	109.494	18.2647	1
100100000002	2016-11-15 09:47:00	109.495	18.265	1
100100000002	2016-11-15 09:47:00	109.495	18.265	1
100100000002	2016-11-15 09:47:00	109.495	18.265	1
100100000002	2016-11-15 09:47:00	109.495	18.265	1
100100000002	2016-11-15 09:47:00	109.495	18.265	1
100100000002	2016-11-15 09:47:00	109.495	18.265	1
100100000002	2016-11-15 09:48:00	109.495	18.265	1
100100000002	2016-11-15 09:48:00	109.495	18.265	1
100100000002	2016-11-15 09:48:00	109.495	18.265	1
100100000002	2016-11-15 09:48:00	109.495	18.265	1
100100000002	2016-11-15 09:48:00	109.495	18.265	1
100100000002	2016-11-15 09:48:00	109.495	18.265	1
100100000002	2016-11-15 09:49:00	109.495	18.265	1
100100000002	2016-11-15 09:49:00	109.495	18.265	1
100100000002	2016-11-15 09:49:00	109.495	18.2651	1
100100000002	2016-11-15 09:49:00	109.495	18.2654	1
100100000002	2016-11-15 09:49:00	109.495	18.2656	1
100100000002	2016-11-15 09:49:00	109.496	18.2658	1
100100000002	2016-11-15 09:50:00	109.496	18.2663	1
100100000002	2016-11-15 09:50:00	109.497	18.2668	1
100100000002	2016-11-15 09:50:00	109.497	18.2671	1
100100000002	2016-11-15 09:50:00	109.498	18.2673	1
100100000002	2016-11-15 09:50:00	109.498	18.2674	1
100100000002	2016-11-15 09:50:00	109.498	18.2675	1
100100000002	2016-11-15 09:51:00	109.498	18.2675	1
100100000002	2016-11-15 09:51:00	109.498	18.2675	1
100100000002	2016-11-15 09:51:00	109.498	18.2675	1
100100000002	2016-11-15 09:51:00	109.498	18.2676	1
100100000002	2016-11-15 09:51:00	109.498	18.2679	1
100100000002	2016-11-15 09:51:00	109.499	18.2684	1
100100000002	2016-11-15 09:52:00	109.499	18.2687	1
100100000002	2016-11-15 09:52:00	109.5	18.2688	1
100100000002	2016-11-15 09:52:00	109.5	18.2683	1
100100000002	2016-11-15 09:52:00	109.501	18.2674	1
100100000002	2016-11-15 09:52:00	109.501	18.2665	1
100100000002	2016-11-15 09:52:00	109.502	18.2658	1
100100000002	2016-11-15 09:53:00	109.502	18.2656	1
100100000002	2016-11-15 09:53:00	109.502	18.2652	1
100100000002	2016-11-15 09:53:00	109.503	18.2645	1
100100000002	2016-11-15 09:53:00	109.503	18.2641	1
100100000002	2016-11-15 09:53:00	109.503	18.2633	1
100100000002	2016-11-15 09:53:00	109.504	18.2625	1
100100000002	2016-11-15 09:54:00	109.505	18.2617	1
100100000002	2016-11-15 09:54:00	109.506	18.261	1
100100000002	2016-11-15 09:54:00	109.506	18.2606	1
100100000002	2016-11-15 09:54:00	109.506	18.2606	1
100100000002	2016-11-15 09:54:00	109.506	18.2606	1
100100000002	2016-11-15 09:54:00	109.507	18.2605	1
100100000002	2016-11-15 09:55:00	109.507	18.2604	1
100100000002	2016-11-15 09:55:00	109.508	18.2603	1
100100000002	2016-11-15 09:55:00	109.508	18.2601	1
100100000002	2016-11-15 09:55:00	109.508	18.2601	1
100100000002	2016-11-15 09:55:00	109.508	18.2601	1
100100000002	2016-11-15 09:55:00	109.508	18.26	1
100100000002	2016-11-15 09:56:00	109.509	18.2598	1
100100000002	2016-11-15 09:56:00	109.51	18.2596	1
100100000002	2016-11-15 09:56:00	109.51	18.2596	1
100100000002	2016-11-15 09:56:00	109.51	18.2595	1
100100000002	2016-11-15 09:56:00	109.51	18.2594	1
100100000002	2016-11-15 09:56:00	109.51	18.2594	1
100100000002	2016-11-15 09:56:00	109.51	18.2589	1
100100000002	2016-11-15 09:57:00	109.51	18.2582	1
100100000002	2016-11-15 09:57:00	109.509	18.2575	1
100100000002	2016-11-15 09:57:00	109.509	18.2569	1
100100000002	2016-11-15 09:57:00	109.509	18.2566	1
100100000002	2016-11-15 09:57:00	109.509	18.2565	1
100100000002	2016-11-15 09:57:00	109.509	18.256	1
100100000002	2016-11-15 09:58:00	109.509	18.2559	1
100100000002	2016-11-15 09:58:00	109.509	18.2554	1
100100000002	2016-11-15 09:58:00	109.509	18.2552	1
100100000002	2016-11-15 09:58:00	109.509	18.255	1
100100000002	2016-11-15 09:58:00	109.509	18.2545	1
100100000002	2016-11-15 09:58:00	109.509	18.2544	1
100100000002	2016-11-15 09:59:00	109.509	18.2544	1
100100000002	2016-11-15 09:59:00	109.509	18.2544	0
100100000002	2016-11-15 09:59:00	109.509	18.2544	1
100100000002	2016-11-15 09:59:00	109.509	18.2544	1
100100000002	2016-11-15 09:59:00	109.509	18.2542	1
100100000002	2016-11-15 09:59:00	109.508	18.2541	1
100100000002	2016-11-15 10:00:00	109.508	18.2541	1
100100000003	2016-11-15 09:00:00	109.503	18.2658	1
100100000003	2016-11-15 09:00:00	109.502	18.2657	1
100100000003	2016-11-15 09:00:00	109.502	18.2655	1
100100000003	2016-11-15 09:00:00	109.502	18.2655	1
100100000003	2016-11-15 09:00:00	109.502	18.2658	1
100100000003	2016-11-15 09:00:00	109.501	18.2663	1
100100000003	2016-11-15 09:01:00	109.501	18.2668	1
100100000003	2016-11-15 09:01:00	109.501	18.2669	1
100100000003	2016-11-15 09:01:00	109.501	18.267	1
100100000003	2016-11-15 09:01:00	109.501	18.267	1
100100000003	2016-11-15 09:01:00	109.501	18.267	1
100100000003	2016-11-15 09:01:00	109.501	18.2672	1
100100000003	2016-11-15 09:02:00	109.501	18.2676	1
100100000003	2016-11-15 09:02:00	109.5	18.2681	1
100100000003	2016-11-15 09:02:00	109.5	18.2683	1
100100000003	2016-11-15 09:02:00	109.5	18.2684	1
100100000003	2016-11-15 09:02:00	109.5	18.2689	1
100100000003	2016-11-15 09:02:00	109.5	18.2693	1
100100000003	2016-11-15 09:03:00	109.5	18.2698	1
100100000003	2016-11-15 09:03:00	109.501	18.2698	1
100100000003	2016-11-15 09:03:00	109.501	18.2703	1
100100000003	2016-11-15 09:03:00	109.502	18.2711	1
100100000003	2016-11-15 09:03:00	109.503	18.2718	1
100100000003	2016-11-15 09:03:00	109.504	18.2725	1
100100000003	2016-11-15 09:04:00	109.504	18.2732	1
100100000003	2016-11-15 09:04:00	109.505	18.2739	1
100100000003	2016-11-15 09:04:00	109.506	18.2745	1
100100000003	2016-11-15 09:04:00	109.507	18.2749	1
100100000003	2016-11-15 09:04:00	109.507	18.2754	1
100100000003	2016-11-15 09:04:00	109.507	18.2756	1
100100000003	2016-11-15 09:05:00	109.508	18.2761	1
100100000003	2016-11-15 09:05:00	109.508	18.2764	1
100100000003	2016-11-15 09:05:00	109.508	18.2764	1
100100000003	2016-11-15 09:05:00	109.508	18.2764	1
100100000003	2016-11-15 09:05:00	109.508	18.2764	1
100100000003	2016-11-15 09:05:00	109.508	18.2764	1
100100000003	2016-11-15 09:06:00	109.508	18.2764	1
100100000003	2016-11-15 09:06:00	109.508	18.2764	1
100100000003	2016-11-15 09:06:00	109.508	18.2766	1
100100000003	2016-11-15 09:06:00	109.509	18.2769	1
100100000003	2016-11-15 09:06:00	109.509	18.2772	1
100100000003	2016-11-15 09:06:00	109.508	18.2778	1
100100000003	2016-11-15 09:07:00	109.508	18.2784	1
100100000003	2016-11-15 09:07:00	109.507	18.2789	1
100100000003	2016-11-15 09:07:00	109.507	18.2793	1
100100000003	2016-11-15 09:07:00	109.506	18.2803	1
100100000003	2016-11-15 09:07:00	109.505	18.2813	1
100100000003	2016-11-15 09:07:00	109.504	18.2826	1
100100000003	2016-11-15 09:08:00	109.503	18.2835	1
100100000003	2016-11-15 09:08:00	109.502	18.2847	1
100100000003	2016-11-15 09:08:00	109.501	18.2856	1
100100000003	2016-11-15 09:08:00	109.501	18.286	1
100100000003	2016-11-15 09:08:00	109.501	18.286	1
100100000003	2016-11-15 09:08:00	109.501	18.2863	1
100100000003	2016-11-15 09:09:00	109.5	18.2866	1
100100000003	2016-11-15 09:09:00	109.5	18.2869	1
100100000003	2016-11-15 09:09:00	109.5	18.2872	1
100100000003	2016-11-15 09:09:00	109.5	18.2875	1
100100000003	2016-11-15 09:09:00	109.501	18.2882	1
100100000003	2016-11-15 09:09:00	109.502	18.289	1
100100000003	2016-11-15 09:10:00	109.503	18.2899	1
100100000003	2016-11-15 09:10:00	109.503	18.2905	1
100100000003	2016-11-15 09:10:00	109.504	18.291	1
100100000003	2016-11-15 09:10:00	109.505	18.2916	1
100100000003	2016-11-15 09:10:00	109.507	18.2922	1
100100000003	2016-11-15 09:10:00	109.508	18.2926	1
100100000003	2016-11-15 09:11:00	109.508	18.2929	1
100100000003	2016-11-15 09:11:00	109.509	18.2933	1
100100000003	2016-11-15 09:11:00	109.51	18.2937	1
100100000003	2016-11-15 09:11:00	109.511	18.294	1
100100000003	2016-11-15 09:11:00	109.512	18.2944	1
100100000003	2016-11-15 09:11:00	109.513	18.2946	1
100100000003	2016-11-15 09:12:00	109.513	18.2948	1
100100000003	2016-11-15 09:12:00	109.513	18.2949	1
100100000003	2016-11-15 09:12:00	109.513	18.2949	1
100100000003	2016-11-15 09:12:00	109.513	18.2949	1
100100000003	2016-11-15 09:12:00	109.513	18.2949	1
100100000003	2016-11-15 09:12:00	109.513	18.295	1
100100000003	2016-11-15 09:13:00	109.514	18.2951	1
100100000003	2016-11-15 09:14:00	109.519	18.2972	1
100100000003	2016-11-15 09:14:00	109.52	18.2973	1
100100000003	2016-11-15 09:14:00	109.52	18.2975	1
100100000003	2016-11-15 09:14:00	109.521	18.2977	1
100100000003	2016-11-15 09:15:00	109.522	18.2979	1
100100000003	2016-11-15 09:15:00	109.522	18.2981	1
100100000003	2016-11-15 09:15:00	109.523	18.2985	1
100100000003	2016-11-15 09:15:00	109.524	18.2987	1
100100000003	2016-11-15 09:15:00	109.525	18.2989	1
100100000003	2016-11-15 09:15:00	109.526	18.2992	1
100100000003	2016-11-15 09:16:00	109.526	18.2994	1
100100000003	2016-11-15 09:16:00	109.527	18.2995	1
100100000003	2016-11-15 09:16:00	109.527	18.2996	1
100100000003	2016-11-15 09:16:00	109.527	18.2996	1
100100000003	2016-11-15 09:16:00	109.527	18.2996	1
100100000003	2016-11-15 09:16:00	109.527	18.2996	1
100100000003	2016-11-15 09:17:00	109.527	18.2996	1
100100000003	2016-11-15 09:17:00	109.527	18.2996	1
100100000003	2016-11-15 09:17:00	109.527	18.2996	1
100100000003	2016-11-15 09:17:00	109.527	18.2996	1
100100000003	2016-11-15 09:17:00	109.527	18.2997	1
100100000003	2016-11-15 09:17:00	109.528	18.2999	1
100100000003	2016-11-15 09:18:00	109.529	18.3001	1
100100000003	2016-11-15 09:18:00	109.53	18.3003	1
100100000003	2016-11-15 09:18:00	109.531	18.3005	1
100100000003	2016-11-15 09:18:00	109.531	18.3005	1
100100000003	2016-11-15 09:18:00	109.532	18.3006	1
100100000003	2016-11-15 09:18:00	109.533	18.3007	1
100100000003	2016-11-15 09:19:00	109.534	18.3007	1
100100000003	2016-11-15 09:19:00	109.535	18.3004	1
100100000003	2016-11-15 09:19:00	109.536	18.2999	1
100100000003	2016-11-15 09:19:00	109.537	18.2993	1
100100000003	2016-11-15 09:19:00	109.538	18.299	1
100100000003	2016-11-15 09:19:00	109.538	18.2989	1
100100000003	2016-11-15 09:20:00	109.539	18.2988	1
100100000003	2016-11-15 09:20:00	109.539	18.2988	1
100100000003	2016-11-15 09:20:00	109.539	18.2987	1
100100000003	2016-11-15 09:20:00	109.539	18.2986	1
100100000003	2016-11-15 09:20:00	109.539	18.2985	1
100100000003	2016-11-15 09:20:00	109.539	18.2983	1
100100000003	2016-11-15 09:21:00	109.539	18.2983	1
100100000003	2016-11-15 09:21:00	109.539	18.2982	1
100100000003	2016-11-15 09:21:00	109.539	18.298	1
100100000003	2016-11-15 09:21:00	109.539	18.2977	1
100100000003	2016-11-15 09:21:00	109.54	18.2974	1
100100000003	2016-11-15 09:21:00	109.54	18.2971	1
100100000003	2016-11-15 09:22:00	109.54	18.2969	1
100100000003	2016-11-15 09:22:00	109.54	18.2967	1
100100000003	2016-11-15 09:22:00	109.54	18.2965	1
100100000003	2016-11-15 09:22:00	109.54	18.2964	1
100100000003	2016-11-15 09:22:00	109.54	18.2962	1
100100000003	2016-11-15 09:22:00	109.541	18.2959	1
100100000003	2016-11-15 09:23:00	109.541	18.2956	1
100100000003	2016-11-15 09:23:00	109.541	18.2953	1
100100000003	2016-11-15 09:23:00	109.542	18.2952	1
100100000003	2016-11-15 09:23:00	109.542	18.2959	1
100100000003	2016-11-15 09:23:00	109.543	18.2968	1
100100000003	2016-11-15 09:23:00	109.543	18.2978	1
100100000003	2016-11-15 09:23:00	109.544	18.2986	1
100100000003	2016-11-15 09:24:00	109.545	18.2989	1
100100000003	2016-11-15 09:24:00	109.545	18.2989	1
100100000003	2016-11-15 09:24:00	109.546	18.299	1
100100000003	2016-11-15 09:24:00	109.546	18.2992	1
100100000003	2016-11-15 09:24:00	109.547	18.2988	1
100100000003	2016-11-15 09:24:00	109.547	18.2983	1
100100000003	2016-11-15 09:25:00	109.547	18.2981	1
100100000003	2016-11-15 09:25:00	109.548	18.2983	1
100100000003	2016-11-15 09:25:00	109.548	18.2985	1
100100000003	2016-11-15 09:25:00	109.548	18.2986	1
100100000003	2016-11-15 09:25:00	109.548	18.2987	1
100100000003	2016-11-15 09:25:00	109.548	18.2987	1
100100000003	2016-11-15 09:25:00	109.548	18.2987	1
100100000003	2016-11-15 09:26:00	109.548	18.2987	1
100100000003	2016-11-15 09:26:00	109.548	18.2987	1
100100000003	2016-11-15 09:26:00	109.548	18.2987	1
100100000003	2016-11-15 09:26:00	109.548	18.2987	1
100100000003	2016-11-15 09:26:00	109.548	18.2987	1
100100000003	2016-11-15 09:26:00	109.548	18.2987	1
100100000003	2016-11-15 09:27:00	109.548	18.2987	0
100100000003	2016-11-15 09:27:00	109.548	18.2987	0
100100000003	2016-11-15 09:27:00	109.548	18.2987	0
100100000003	2016-11-15 09:27:00	109.548	18.2985	0
100100000003	2016-11-15 09:27:00	109.548	18.2984	0
100100000003	2016-11-15 09:27:00	109.548	18.2982	0
100100000003	2016-11-15 09:28:00	109.547	18.2981	0
100100000003	2016-11-15 09:28:00	109.547	18.2981	0
100100000003	2016-11-15 09:28:00	109.547	18.2984	0
100100000003	2016-11-15 09:28:00	109.546	18.2989	0
100100000003	2016-11-15 09:28:00	109.546	18.2992	0
100100000003	2016-11-15 09:28:00	109.546	18.2988	0
100100000003	2016-11-15 09:28:00	109.545	18.2988	0
100100000003	2016-11-15 09:29:00	109.545	18.2989	0
100100000003	2016-11-15 09:29:00	109.545	18.2988	0
100100000003	2016-11-15 09:29:00	109.544	18.2985	0
100100000003	2016-11-15 09:29:00	109.544	18.298	0
100100000003	2016-11-15 09:29:00	109.543	18.2974	0
100100000003	2016-11-15 09:29:00	109.543	18.2967	0
100100000003	2016-11-15 09:30:00	109.542	18.2961	0
100100000003	2016-11-15 09:30:00	109.542	18.2956	0
100100000003	2016-11-15 09:30:00	109.542	18.2954	0
100100000003	2016-11-15 09:30:00	109.542	18.2952	0
100100000003	2016-11-15 09:30:00	109.542	18.2952	0
100100000003	2016-11-15 09:30:00	109.542	18.2952	0
100100000003	2016-11-15 09:31:00	109.541	18.2955	0
100100000003	2016-11-15 09:31:00	109.541	18.2958	0
100100000003	2016-11-15 09:31:00	109.54	18.2962	0
100100000003	2016-11-15 09:31:00	109.54	18.2965	0
100100000003	2016-11-15 09:31:00	109.54	18.2969	0
100100000003	2016-11-15 09:31:00	109.54	18.2972	0
100100000003	2016-11-15 09:32:00	109.539	18.2976	0
100100000003	2016-11-15 09:32:00	109.539	18.2979	0
100100000003	2016-11-15 09:32:00	109.539	18.2982	0
100100000003	2016-11-15 09:32:00	109.539	18.2984	0
100100000003	2016-11-15 09:32:00	109.539	18.2985	0
100100000003	2016-11-15 09:32:00	109.539	18.2986	0
100100000003	2016-11-15 09:33:00	109.539	18.2987	0
100100000003	2016-11-15 09:33:00	109.538	18.2989	0
100100000003	2016-11-15 09:33:00	109.538	18.2989	0
100100000003	2016-11-15 09:33:00	109.538	18.2989	0
100100000003	2016-11-15 09:33:00	109.538	18.2989	0
100100000003	2016-11-15 09:33:00	109.538	18.2989	0
100100000003	2016-11-15 09:34:00	109.538	18.2989	0
100100000003	2016-11-15 09:34:00	109.538	18.2989	0
100100000003	2016-11-15 09:34:00	109.538	18.2989	0
100100000003	2016-11-15 09:34:00	109.538	18.2989	0
100100000003	2016-11-15 09:34:00	109.538	18.2989	0
100100000003	2016-11-15 09:34:00	109.538	18.2989	0
100100000003	2016-11-15 09:35:00	109.538	18.2989	0
100100000003	2016-11-15 09:35:00	109.538	18.2989	0
100100000003	2016-11-15 09:35:00	109.538	18.2989	0
100100000003	2016-11-15 09:35:00	109.538	18.2989	0
100100000003	2016-11-15 09:35:00	109.538	18.2989	0
100100000003	2016-11-15 09:35:00	109.538	18.2989	0
100100000003	2016-11-15 09:36:00	109.538	18.2989	0
100100000003	2016-11-15 09:36:00	109.538	18.2989	0
100100000003	2016-11-15 09:36:00	109.538	18.2989	0
100100000003	2016-11-15 09:36:00	109.538	18.2989	0
100100000003	2016-11-15 09:36:00	109.538	18.2989	0
100100000003	2016-11-15 09:36:00	109.538	18.2989	0
100100000003	2016-11-15 09:37:00	109.538	18.2989	0
100100000003	2016-11-15 09:37:00	109.538	18.2989	0
100100000003	2016-11-15 09:37:00	109.538	18.2989	0
100100000003	2016-11-15 09:37:00	109.538	18.2989	0
100100000003	2016-11-15 09:37:00	109.538	18.2989	0
100100000003	2016-11-15 09:37:00	109.538	18.2989	0
100100000003	2016-11-15 09:38:00	109.538	18.2989	0
100100000003	2016-11-15 09:38:00	109.538	18.2989	0
100100000003	2016-11-15 09:38:00	109.538	18.2989	0
100100000003	2016-11-15 09:38:00	109.538	18.2989	0
100100000003	2016-11-15 09:38:00	109.538	18.2989	0
100100000003	2016-11-15 09:38:00	109.538	18.2989	0
100100000003	2016-11-15 09:39:00	109.538	18.2989	0
100100000003	2016-11-15 09:39:00	109.538	18.299	0
100100000003	2016-11-15 09:39:00	109.538	18.2991	0
100100000003	2016-11-15 09:39:00	109.537	18.2994	0
100100000003	2016-11-15 09:39:00	109.536	18.2999	0
100100000003	2016-11-15 09:39:00	109.535	18.3003	0
100100000003	2016-11-15 09:40:00	109.534	18.3006	0
100100000003	2016-11-15 09:40:00	109.534	18.3007	0
100100000003	2016-11-15 09:40:00	109.533	18.3008	0
100100000003	2016-11-15 09:40:00	109.533	18.3008	0
100100000003	2016-11-15 09:40:00	109.533	18.3008	0
100100000003	2016-11-15 09:40:00	109.533	18.3008	0
100100000003	2016-11-15 09:41:00	109.533	18.3008	0
100100000003	2016-11-15 09:41:00	109.533	18.3008	0
100100000003	2016-11-15 09:41:00	109.533	18.3008	0
100100000003	2016-11-15 09:41:00	109.533	18.3008	0
100100000003	2016-11-15 09:41:00	109.533	18.3008	0
100100000003	2016-11-15 09:41:00	109.533	18.3008	1
100100000003	2016-11-15 09:42:00	109.532	18.3007	1
100100000003	2016-11-15 09:42:00	109.531	18.3006	1
100100000003	2016-11-15 09:42:00	109.53	18.3004	1
100100000003	2016-11-15 09:42:00	109.528	18.3001	1
100100000003	2016-11-15 09:42:00	109.528	18.2999	1
100100000003	2016-11-15 09:42:00	109.528	18.2999	1
100100000003	2016-11-15 09:43:00	109.528	18.2999	1
100100000003	2016-11-15 09:43:00	109.528	18.2999	1
100100000003	2016-11-15 09:43:00	109.527	18.2996	1
100100000003	2016-11-15 09:43:00	109.527	18.2989	1
100100000003	2016-11-15 09:43:00	109.528	18.2976	1
100100000003	2016-11-15 09:43:00	109.528	18.2956	1
100100000003	2016-11-15 09:44:00	109.529	18.2938	1
100100000003	2016-11-15 09:44:00	109.529	18.2926	1
100100000003	2016-11-15 09:44:00	109.528	18.2921	1
100100000003	2016-11-15 09:44:00	109.527	18.2915	1
100100000003	2016-11-15 09:44:00	109.526	18.2909	1
100100000003	2016-11-15 09:44:00	109.525	18.2904	1
100100000003	2016-11-15 09:45:00	109.525	18.2903	1
100100000003	2016-11-15 09:45:00	109.525	18.2903	1
100100000003	2016-11-15 09:45:00	109.525	18.2903	1
100100000003	2016-11-15 09:45:00	109.525	18.2903	1
100100000003	2016-11-15 09:45:00	109.525	18.2903	1
100100000003	2016-11-15 09:45:00	109.525	18.2903	1
100100000003	2016-11-15 09:46:00	109.525	18.2903	1
100100000003	2016-11-15 09:46:00	109.525	18.2903	1
100100000003	2016-11-15 09:46:00	109.525	18.2903	1
100100000003	2016-11-15 09:46:00	109.525	18.29	1
100100000003	2016-11-15 09:46:00	109.525	18.2891	1
100100000003	2016-11-15 09:46:00	109.525	18.2879	1
100100000003	2016-11-15 09:47:00	109.525	18.2863	1
100100000003	2016-11-15 09:47:00	109.526	18.2853	1
100100000003	2016-11-15 09:47:00	109.526	18.2839	1
100100000003	2016-11-15 09:47:00	109.526	18.2829	1
100100000003	2016-11-15 09:47:00	109.526	18.2825	1
100100000003	2016-11-15 09:47:00	109.525	18.2817	1
100100000003	2016-11-15 09:48:00	109.525	18.2808	1
100100000003	2016-11-15 09:48:00	109.524	18.2797	1
100100000003	2016-11-15 09:48:00	109.524	18.2782	1
100100000003	2016-11-15 09:48:00	109.524	18.2769	1
100100000003	2016-11-15 09:48:00	109.524	18.2758	1
100100000003	2016-11-15 09:48:00	109.525	18.2752	1
100100000003	2016-11-15 09:49:00	109.525	18.2751	1
100100000003	2016-11-15 09:49:00	109.525	18.2751	1
100100000003	2016-11-15 09:49:00	109.525	18.2749	1
100100000003	2016-11-15 09:49:00	109.525	18.2747	1
100100000003	2016-11-15 09:49:00	109.524	18.274	1
100100000003	2016-11-15 09:49:00	109.523	18.2732	1
100100000003	2016-11-15 09:49:00	109.522	18.2728	1
100100000003	2016-11-15 09:50:00	109.52	18.2729	1
100100000003	2016-11-15 09:50:00	109.519	18.2727	1
100100000003	2016-11-15 09:50:00	109.517	18.2721	1
100100000003	2016-11-15 09:50:00	109.516	18.2709	1
100100000003	2016-11-15 09:50:00	109.515	18.2704	1
100100000003	2016-11-15 09:50:00	109.515	18.2704	1
100100000003	2016-11-15 09:51:00	109.515	18.2704	1
100100000003	2016-11-15 09:51:00	109.515	18.2704	1
100100000003	2016-11-15 09:51:00	109.515	18.2704	1
100100000003	2016-11-15 09:51:00	109.515	18.2704	1
100100000003	2016-11-15 09:51:00	109.515	18.2704	1
100100000003	2016-11-15 09:51:00	109.515	18.2704	1
100100000003	2016-11-15 09:52:00	109.515	18.2701	1
100100000003	2016-11-15 09:52:00	109.514	18.2696	1
100100000003	2016-11-15 09:52:00	109.514	18.269	1
100100000003	2016-11-15 09:52:00	109.513	18.2685	1
100100000003	2016-11-15 09:52:00	109.513	18.2675	1
100100000003	2016-11-15 09:52:00	109.512	18.2668	1
100100000003	2016-11-15 09:53:00	109.512	18.2662	1
100100000003	2016-11-15 09:53:00	109.512	18.2654	1
100100000003	2016-11-15 09:53:00	109.511	18.265	1
100100000003	2016-11-15 09:53:00	109.511	18.2647	1
100100000003	2016-11-15 09:53:00	109.51	18.264	1
100100000003	2016-11-15 09:53:00	109.509	18.2632	1
100100000003	2016-11-15 09:54:00	109.508	18.2624	1
100100000003	2016-11-15 09:54:00	109.507	18.2616	1
100100000003	2016-11-15 09:54:00	109.507	18.2609	1
100100000003	2016-11-15 09:54:00	109.507	18.2608	1
100100000003	2016-11-15 09:54:00	109.507	18.2608	1
100100000003	2016-11-15 09:54:00	109.507	18.2608	1
100100000003	2016-11-15 09:55:00	109.507	18.2608	1
100100000003	2016-11-15 09:55:00	109.507	18.2608	1
100100000003	2016-11-15 09:55:00	109.507	18.2608	1
100100000003	2016-11-15 09:55:00	109.507	18.2606	1
100100000003	2016-11-15 09:55:00	109.507	18.2597	1
100100000003	2016-11-15 09:56:00	109.506	18.2581	1
100100000003	2016-11-15 09:56:00	109.507	18.2564	1
100100000003	2016-11-15 09:56:00	109.507	18.255	1
100100000003	2016-11-15 09:56:00	109.507	18.2543	1
100100000003	2016-11-15 09:56:00	109.507	18.254	1
100100000003	2016-11-15 09:56:00	109.506	18.2538	1
100100000003	2016-11-15 09:56:00	109.505	18.2537	1
100100000003	2016-11-15 09:57:00	109.505	18.2537	1
100100000003	2016-11-15 09:57:00	109.505	18.2537	1
100100000003	2016-11-15 09:57:00	109.504	18.2536	1
100100000003	2016-11-15 09:57:00	109.504	18.2535	1
100100000003	2016-11-15 09:57:00	109.503	18.2533	1
100100000003	2016-11-15 09:57:00	109.502	18.2532	1
100100000003	2016-11-15 09:58:00	109.502	18.2532	1
100100000003	2016-11-15 09:58:00	109.502	18.2531	1
100100000003	2016-11-15 09:58:00	109.502	18.2531	1
100100000003	2016-11-15 09:58:00	109.502	18.2531	1
100100000003	2016-11-15 09:58:00	109.502	18.2531	1
100100000003	2016-11-15 09:58:00	109.502	18.2531	1
100100000003	2016-11-15 09:59:00	109.502	18.2531	1
100100000003	2016-11-15 09:59:00	109.502	18.2531	0
100100000003	2016-11-15 09:59:00	109.502	18.2531	0
100100000003	2016-11-15 09:59:00	109.502	18.2531	0
100100000003	2016-11-15 09:59:00	109.502	18.2531	0
100100000003	2016-11-15 09:59:00	109.502	18.2531	0
100100000004	2016-11-15 09:00:00	109.604	18.2982	1
100100000004	2016-11-15 09:00:00	109.603	18.3001	1
100100000004	2016-11-15 09:00:00	109.602	18.3017	1
100100000004	2016-11-15 09:00:00	109.602	18.3023	1
100100000004	2016-11-15 09:00:00	109.602	18.3023	1
100100000004	2016-11-15 09:00:00	109.602	18.3024	1
100100000004	2016-11-15 09:01:00	109.601	18.3028	1
100100000004	2016-11-15 09:01:00	109.6	18.3036	1
100100000004	2016-11-15 09:01:00	109.599	18.3044	1
100100000004	2016-11-15 09:01:00	109.598	18.3052	1
100100000004	2016-11-15 09:01:00	109.598	18.3059	1
100100000004	2016-11-15 09:01:00	109.597	18.3065	1
100100000004	2016-11-15 09:02:00	109.596	18.3072	1
100100000004	2016-11-15 09:02:00	109.595	18.308	1
100100000004	2016-11-15 09:02:00	109.594	18.3087	1
100100000004	2016-11-15 09:02:00	109.593	18.3094	1
100100000004	2016-11-15 09:02:00	109.592	18.3099	1
100100000004	2016-11-15 09:02:00	109.591	18.3104	1
100100000004	2016-11-15 09:03:00	109.591	18.3106	1
100100000004	2016-11-15 09:03:00	109.591	18.3106	1
100100000004	2016-11-15 09:03:00	109.591	18.3106	1
100100000004	2016-11-15 09:03:00	109.591	18.3106	1
100100000004	2016-11-15 09:03:00	109.585	18.3136	1
100100000004	2016-11-15 09:03:00	109.585	18.3145	1
100100000004	2016-11-15 09:04:00	109.584	18.3155	1
100100000004	2016-11-15 09:04:00	109.583	18.3164	1
100100000004	2016-11-15 09:04:00	109.582	18.3174	1
100100000004	2016-11-15 09:04:00	109.581	18.3182	1
100100000004	2016-11-15 09:04:00	109.58	18.3192	1
100100000004	2016-11-15 09:04:00	109.579	18.3202	1
100100000004	2016-11-15 09:05:00	109.578	18.321	1
100100000004	2016-11-15 09:05:00	109.577	18.321	1
100100000004	2016-11-15 09:05:00	109.577	18.3204	1
100100000004	2016-11-15 09:05:00	109.576	18.3198	1
100100000004	2016-11-15 09:05:00	109.574	18.3196	1
100100000004	2016-11-15 09:05:00	109.573	18.3195	1
100100000004	2016-11-15 09:06:00	109.57	18.3195	1
100100000004	2016-11-15 09:06:00	109.568	18.3199	1
100100000004	2016-11-15 09:06:00	109.565	18.3206	1
100100000004	2016-11-15 09:06:00	109.563	18.3212	1
100100000004	2016-11-15 09:06:00	109.561	18.3214	1
100100000004	2016-11-15 09:06:00	109.558	18.3213	1
100100000004	2016-11-15 09:07:00	109.556	18.3208	1
100100000004	2016-11-15 09:07:00	109.553	18.32	1
100100000004	2016-11-15 09:07:00	109.551	18.3192	1
100100000004	2016-11-15 09:07:00	109.549	18.3183	1
100100000004	2016-11-15 09:07:00	109.547	18.3175	1
100100000004	2016-11-15 09:07:00	109.545	18.317	1
100100000004	2016-11-15 09:08:00	109.542	18.3166	1
100100000004	2016-11-15 09:08:00	109.54	18.3165	1
100100000004	2016-11-15 09:08:00	109.538	18.3163	1
100100000004	2016-11-15 09:08:00	109.535	18.3161	1
100100000004	2016-11-15 09:08:00	109.533	18.3159	1
100100000004	2016-11-15 09:08:00	109.531	18.3157	1
100100000004	2016-11-15 09:09:00	109.529	18.3156	1
100100000004	2016-11-15 09:09:00	109.526	18.3157	1
100100000004	2016-11-15 09:09:00	109.524	18.316	1
100100000004	2016-11-15 09:09:00	109.522	18.3167	1
100100000004	2016-11-15 09:09:00	109.52	18.3175	1
100100000004	2016-11-15 09:09:00	109.518	18.3187	1
100100000004	2016-11-15 09:10:00	109.517	18.32	1
100100000004	2016-11-15 09:10:00	109.515	18.3213	1
100100000004	2016-11-15 09:10:00	109.514	18.3225	1
100100000004	2016-11-15 09:10:00	109.513	18.3236	1
100100000004	2016-11-15 09:10:00	109.512	18.3246	1
100100000004	2016-11-15 09:10:00	109.51	18.3255	1
100100000004	2016-11-15 09:11:00	109.509	18.326	1
100100000004	2016-11-15 09:11:00	109.509	18.326	1
100100000004	2016-11-15 09:11:00	109.509	18.326	1
100100000004	2016-11-15 09:11:00	109.509	18.326	1
100100000004	2016-11-15 09:11:00	109.509	18.326	1
100100000004	2016-11-15 09:11:00	109.509	18.326	1
100100000004	2016-11-15 09:12:00	109.498	18.3256	1
100100000004	2016-11-15 09:12:00	109.495	18.3251	1
100100000004	2016-11-15 09:12:00	109.493	18.3246	1
100100000004	2016-11-15 09:12:00	109.491	18.3242	1
100100000004	2016-11-15 09:12:00	109.489	18.3241	1
100100000004	2016-11-15 09:12:00	109.486	18.3241	1
100100000004	2016-11-15 09:13:00	109.484	18.3242	1
100100000004	2016-11-15 09:13:00	109.482	18.3243	1
100100000004	2016-11-15 09:13:00	109.48	18.3245	1
100100000004	2016-11-15 09:13:00	109.477	18.3246	1
100100000004	2016-11-15 09:13:00	109.475	18.3247	1
100100000004	2016-11-15 09:13:00	109.473	18.3248	1
100100000004	2016-11-15 09:14:00	109.471	18.3249	1
100100000004	2016-11-15 09:14:00	109.468	18.3251	1
100100000004	2016-11-15 09:14:00	109.467	18.3251	1
100100000004	2016-11-15 09:14:00	109.465	18.3249	1
100100000004	2016-11-15 09:14:00	109.463	18.3246	1
100100000004	2016-11-15 09:14:00	109.461	18.324	1
100100000004	2016-11-15 09:15:00	109.459	18.3231	1
100100000004	2016-11-15 09:15:00	109.457	18.3222	1
100100000004	2016-11-15 09:15:00	109.454	18.3212	1
100100000004	2016-11-15 09:15:00	109.452	18.3204	1
100100000004	2016-11-15 09:15:00	109.451	18.3195	1
100100000004	2016-11-15 09:15:00	109.449	18.3187	1
100100000004	2016-11-15 09:16:00	109.447	18.3179	1
100100000004	2016-11-15 09:16:00	109.445	18.3172	1
100100000004	2016-11-15 09:16:00	109.442	18.3166	1
100100000004	2016-11-15 09:16:00	109.44	18.3163	1
100100000004	2016-11-15 09:16:00	109.438	18.3162	1
100100000004	2016-11-15 09:16:00	109.436	18.3163	1
100100000004	2016-11-15 09:17:00	109.434	18.3166	1
100100000004	2016-11-15 09:17:00	109.431	18.317	1
100100000004	2016-11-15 09:17:00	109.43	18.3173	1
100100000004	2016-11-15 09:17:00	109.428	18.3175	1
100100000004	2016-11-15 09:17:00	109.428	18.3175	1
100100000004	2016-11-15 09:17:00	109.428	18.3175	1
100100000004	2016-11-15 09:18:00	109.428	18.3175	1
100100000004	2016-11-15 09:18:00	109.421	18.3173	1
100100000004	2016-11-15 09:18:00	109.42	18.3171	1
100100000004	2016-11-15 09:18:00	109.418	18.317	1
100100000004	2016-11-15 09:18:00	109.416	18.317	1
100100000004	2016-11-15 09:18:00	109.414	18.317	1
100100000004	2016-11-15 09:19:00	109.412	18.3171	1
100100000004	2016-11-15 09:19:00	109.412	18.3171	1
100100000004	2016-11-15 09:19:00	109.412	18.3171	1
100100000004	2016-11-15 09:19:00	109.407	18.3179	1
100100000004	2016-11-15 09:19:00	109.405	18.3184	1
100100000004	2016-11-15 09:19:00	109.403	18.3189	1
100100000004	2016-11-15 09:20:00	109.401	18.3195	1
100100000004	2016-11-15 09:20:00	109.399	18.3201	1
100100000004	2016-11-15 09:20:00	109.397	18.3206	1
100100000004	2016-11-15 09:20:00	109.395	18.3212	1
100100000004	2016-11-15 09:20:00	109.393	18.3215	1
100100000004	2016-11-15 09:20:00	109.39	18.3216	1
100100000004	2016-11-15 09:21:00	109.388	18.3214	1
100100000004	2016-11-15 09:21:00	109.386	18.3209	1
100100000004	2016-11-15 09:21:00	109.384	18.3202	1
100100000004	2016-11-15 09:21:00	109.381	18.3191	1
100100000004	2016-11-15 09:21:00	109.38	18.3181	1
100100000004	2016-11-15 09:21:00	109.378	18.3168	1
100100000004	2016-11-15 09:22:00	109.376	18.3157	1
100100000004	2016-11-15 09:22:00	109.374	18.3143	1
100100000004	2016-11-15 09:22:00	109.373	18.3131	1
100100000004	2016-11-15 09:22:00	109.37	18.3123	1
100100000004	2016-11-15 09:22:00	109.368	18.312	1
100100000004	2016-11-15 09:22:00	109.366	18.3123	1
100100000004	2016-11-15 09:23:00	109.363	18.3132	1
100100000004	2016-11-15 09:23:00	109.361	18.3147	1
100100000004	2016-11-15 09:23:00	109.36	18.3164	1
100100000004	2016-11-15 09:23:00	109.359	18.3179	1
100100000004	2016-11-15 09:23:00	109.358	18.3193	1
100100000004	2016-11-15 09:23:00	109.357	18.3208	1
100100000004	2016-11-15 09:24:00	109.355	18.3223	1
100100000004	2016-11-15 09:24:00	109.354	18.3236	1
100100000004	2016-11-15 09:24:00	109.352	18.3245	1
100100000004	2016-11-15 09:24:00	109.35	18.3247	1
100100000004	2016-11-15 09:24:00	109.347	18.3243	1
100100000004	2016-11-15 09:24:00	109.346	18.3236	1
100100000004	2016-11-15 09:25:00	109.344	18.3228	1
100100000004	2016-11-15 09:25:00	109.342	18.322	1
100100000004	2016-11-15 09:25:00	109.34	18.3213	1
100100000004	2016-11-15 09:25:00	109.338	18.3204	1
100100000004	2016-11-15 09:25:00	109.336	18.3196	1
100100000004	2016-11-15 09:25:00	109.334	18.3188	1
100100000004	2016-11-15 09:26:00	109.332	18.318	1
100100000004	2016-11-15 09:26:00	109.33	18.3174	1
100100000004	2016-11-15 09:26:00	109.328	18.3171	1
100100000004	2016-11-15 09:26:00	109.326	18.3171	1
100100000004	2016-11-15 09:26:00	109.323	18.3176	1
100100000004	2016-11-15 09:26:00	109.321	18.3183	1
100100000004	2016-11-15 09:27:00	109.319	18.3191	1
100100000004	2016-11-15 09:27:00	109.317	18.3199	1
100100000004	2016-11-15 09:27:00	109.315	18.3206	1
100100000004	2016-11-15 09:27:00	109.313	18.3213	1
100100000004	2016-11-15 09:27:00	109.311	18.3219	1
100100000004	2016-11-15 09:27:00	109.308	18.322	1
100100000004	2016-11-15 09:28:00	109.306	18.3219	1
100100000004	2016-11-15 09:28:00	109.304	18.3213	1
100100000004	2016-11-15 09:28:00	109.301	18.3205	1
100100000004	2016-11-15 09:28:00	109.299	18.3197	1
100100000004	2016-11-15 09:28:00	109.297	18.3189	1
100100000004	2016-11-15 09:28:00	109.295	18.3182	1
100100000004	2016-11-15 09:29:00	109.293	18.3172	1
100100000004	2016-11-15 09:29:00	109.291	18.3164	1
100100000004	2016-11-15 09:29:00	109.288	18.3155	1
100100000004	2016-11-15 09:29:00	109.286	18.3147	1
100100000004	2016-11-15 09:29:00	109.284	18.3139	1
100100000004	2016-11-15 09:29:00	109.282	18.3131	1
100100000004	2016-11-15 09:30:00	109.28	18.3125	1
100100000004	2016-11-15 09:30:00	109.278	18.3121	1
100100000004	2016-11-15 09:30:00	109.276	18.3122	1
100100000004	2016-11-15 09:30:00	109.273	18.313	1
100100000004	2016-11-15 09:30:00	109.272	18.3144	1
100100000004	2016-11-15 09:30:00	109.27	18.3161	1
100100000004	2016-11-15 09:31:00	109.268	18.3179	1
100100000004	2016-11-15 09:31:00	109.267	18.3193	1
100100000004	2016-11-15 09:31:00	109.265	18.3209	1
100100000004	2016-11-15 09:31:00	109.263	18.3221	1
100100000004	2016-11-15 09:31:00	109.261	18.3226	1
100100000004	2016-11-15 09:32:00	109.258	18.3228	1
100100000004	2016-11-15 09:32:00	109.256	18.3225	1
100100000004	2016-11-15 09:32:00	109.254	18.322	1
100100000004	2016-11-15 09:32:00	109.252	18.3216	1
100100000004	2016-11-15 09:32:00	109.25	18.3211	1
100100000004	2016-11-15 09:32:00	109.248	18.3208	1
100100000004	2016-11-15 09:33:00	109.247	18.3208	1
100100000004	2016-11-15 09:33:00	109.246	18.3211	1
100100000004	2016-11-15 09:33:00	109.245	18.321	1
100100000004	2016-11-15 09:33:00	109.244	18.3207	1
100100000004	2016-11-15 09:33:00	109.244	18.3206	1
100100000004	2016-11-15 09:33:00	109.244	18.3198	1
100100000004	2016-11-15 09:33:00	109.244	18.3195	1
100100000004	2016-11-15 09:33:00	109.243	18.3195	1
100100000004	2016-11-15 09:34:00	109.243	18.3197	1
100100000004	2016-11-15 09:34:00	109.242	18.3196	1
100100000004	2016-11-15 09:34:00	109.242	18.3187	1
100100000004	2016-11-15 09:34:00	109.242	18.3175	1
100100000004	2016-11-15 09:34:00	109.241	18.3165	1
100100000004	2016-11-15 09:34:00	109.241	18.3164	1
100100000004	2016-11-15 09:34:00	109.24	18.3165	1
100100000004	2016-11-15 09:35:00	109.24	18.3168	1
100100000004	2016-11-15 09:35:00	109.239	18.3169	1
100100000004	2016-11-15 09:35:00	109.238	18.3174	1
100100000004	2016-11-15 09:35:00	109.237	18.318	1
100100000004	2016-11-15 09:35:00	109.236	18.3185	1
100100000004	2016-11-15 09:35:00	109.236	18.3189	1
100100000004	2016-11-15 09:35:00	109.236	18.319	1
100100000004	2016-11-15 09:36:00	109.236	18.319	1
100100000004	2016-11-15 09:36:00	109.236	18.319	1
100100000004	2016-11-15 09:36:00	109.236	18.319	1
100100000004	2016-11-15 09:36:00	109.236	18.319	1
100100000004	2016-11-15 09:36:00	109.236	18.319	1
100100000004	2016-11-15 09:36:00	109.236	18.319	1
100100000004	2016-11-15 09:37:00	109.236	18.319	1
100100000004	2016-11-15 09:37:00	109.236	18.319	1
100100000004	2016-11-15 09:37:00	109.236	18.319	1
100100000004	2016-11-15 09:37:00	109.236	18.319	1
100100000004	2016-11-15 09:37:00	109.236	18.319	1
100100000004	2016-11-15 09:37:00	109.236	18.319	1
100100000004	2016-11-15 09:38:00	109.236	18.319	1
100100000004	2016-11-15 09:38:00	109.236	18.319	1
100100000004	2016-11-15 09:38:00	109.236	18.319	1
100100000004	2016-11-15 09:38:00	109.236	18.319	1
100100000004	2016-11-15 09:39:00	109.236	18.319	1
100100000004	2016-11-15 09:39:00	109.236	18.319	1
100100000004	2016-11-15 09:39:00	109.236	18.319	1
100100000004	2016-11-15 09:39:00	109.236	18.319	1
100100000004	2016-11-15 09:40:00	109.236	18.319	1
100100000004	2016-11-15 09:40:00	109.236	18.319	1
100100000004	2016-11-15 09:40:00	109.236	18.319	1
100100000004	2016-11-15 09:40:00	109.236	18.319	1
100100000004	2016-11-15 09:41:00	109.236	18.319	1
100100000004	2016-11-15 09:41:00	109.236	18.319	1
100100000004	2016-11-15 09:41:00	109.236	18.319	1
100100000004	2016-11-15 09:41:00	109.236	18.319	1
100100000004	2016-11-15 09:42:00	109.236	18.319	1
100100000004	2016-11-15 09:42:00	109.236	18.319	1
100100000004	2016-11-15 09:42:00	109.236	18.319	1
100100000004	2016-11-15 09:42:00	109.236	18.319	1
100100000004	2016-11-15 09:42:00	109.236	18.319	1
100100000004	2016-11-15 09:43:00	109.236	18.319	1
100100000004	2016-11-15 09:43:00	109.235	18.319	1
100100000004	2016-11-15 09:43:00	109.235	18.3191	1
100100000004	2016-11-15 09:43:00	109.234	18.3195	1
100100000004	2016-11-15 09:43:00	109.233	18.3196	1
100100000004	2016-11-15 09:43:00	109.231	18.3196	1
100100000004	2016-11-15 09:44:00	109.23	18.3195	1
100100000004	2016-11-15 09:44:00	109.228	18.3194	1
100100000004	2016-11-15 09:44:00	109.227	18.3193	1
100100000004	2016-11-15 09:44:00	109.226	18.3192	1
100100000004	2016-11-15 09:44:00	109.224	18.3191	1
100100000004	2016-11-15 09:44:00	109.223	18.319	1
100100000004	2016-11-15 09:45:00	109.221	18.3189	1
100100000004	2016-11-15 09:45:00	109.22	18.3188	1
100100000004	2016-11-15 09:45:00	109.218	18.3186	1
100100000004	2016-11-15 09:45:00	109.217	18.3184	1
100100000004	2016-11-15 09:45:00	109.215	18.3182	1
100100000004	2016-11-15 09:45:00	109.214	18.3183	1
100100000004	2016-11-15 09:46:00	109.212	18.3185	1
100100000004	2016-11-15 09:46:00	109.211	18.3187	1
100100000004	2016-11-15 09:46:00	109.209	18.3188	1
100100000004	2016-11-15 09:46:00	109.208	18.3189	1
100100000004	2016-11-15 09:46:00	109.207	18.319	1
100100000004	2016-11-15 09:46:00	109.206	18.319	1
100100000004	2016-11-15 09:47:00	109.205	18.3188	1
100100000004	2016-11-15 09:47:00	109.205	18.318	1
100100000004	2016-11-15 09:47:00	109.205	18.3172	1
100100000004	2016-11-15 09:47:00	109.205	18.3162	1
100100000004	2016-11-15 09:47:00	109.205	18.3148	1
100100000004	2016-11-15 09:47:00	109.205	18.3136	1
100100000004	2016-11-15 09:48:00	109.205	18.3123	1
100100000004	2016-11-15 09:48:00	109.205	18.3114	1
100100000004	2016-11-15 09:48:00	109.205	18.3111	1
100100000004	2016-11-15 09:48:00	109.205	18.3103	1
100100000004	2016-11-15 09:48:00	109.205	18.3097	1
100100000004	2016-11-15 09:48:00	109.205	18.3095	1
100100000004	2016-11-15 09:49:00	109.205	18.3094	1
100100000004	2016-11-15 09:49:00	109.205	18.3089	1
100100000004	2016-11-15 09:49:00	109.205	18.308	1
100100000004	2016-11-15 09:49:00	109.205	18.3074	1
100100000004	2016-11-15 09:49:00	109.205	18.3073	1
100100000004	2016-11-15 09:49:00	109.205	18.3073	1
100100000004	2016-11-15 09:50:00	109.205	18.3073	1
100100000004	2016-11-15 09:50:00	109.205	18.3073	1
100100000004	2016-11-15 09:50:00	109.205	18.3073	1
100100000004	2016-11-15 09:50:00	109.205	18.3073	1
100100000004	2016-11-15 09:50:00	109.205	18.3073	1
100100000004	2016-11-15 09:50:00	109.205	18.3072	1
100100000004	2016-11-15 09:50:00	109.205	18.3072	1
100100000004	2016-11-15 09:51:00	109.205	18.3072	1
100100000004	2016-11-15 09:51:00	109.205	18.3074	0
100100000004	2016-11-15 09:51:00	109.205	18.3084	0
100100000004	2016-11-15 09:51:00	109.205	18.3093	0
100100000004	2016-11-15 09:51:00	109.205	18.3095	0
100100000004	2016-11-15 09:51:00	109.206	18.3098	0
100100000004	2016-11-15 09:51:00	109.206	18.3104	0
100100000004	2016-11-15 09:52:00	109.206	18.3107	0
100100000004	2016-11-15 09:52:00	109.206	18.3111	0
100100000004	2016-11-15 09:52:00	109.206	18.3116	0
100100000004	2016-11-15 09:52:00	109.205	18.3126	0
100100000004	2016-11-15 09:52:00	109.205	18.3136	0
100100000004	2016-11-15 09:52:00	109.206	18.3147	0
100100000004	2016-11-15 09:53:00	109.206	18.3161	0
100100000004	2016-11-15 09:53:00	109.206	18.3171	0
100100000004	2016-11-15 09:53:00	109.206	18.318	0
100100000004	2016-11-15 09:53:00	109.206	18.3189	0
100100000004	2016-11-15 09:53:00	109.206	18.3189	0
100100000004	2016-11-15 09:53:00	109.207	18.3189	0
100100000004	2016-11-15 09:54:00	109.208	18.3189	0
100100000004	2016-11-15 09:54:00	109.209	18.3188	0
100100000004	2016-11-15 09:54:00	109.21	18.3187	0
100100000004	2016-11-15 09:54:00	109.211	18.3186	0
100100000004	2016-11-15 09:54:00	109.212	18.3185	0
100100000004	2016-11-15 09:54:00	109.214	18.3183	0
100100000004	2016-11-15 09:55:00	109.215	18.3182	0
100100000004	2016-11-15 09:55:00	109.216	18.3183	0
100100000004	2016-11-15 09:55:00	109.218	18.3185	0
100100000004	2016-11-15 09:55:00	109.219	18.3187	0
100100000004	2016-11-15 09:55:00	109.22	18.3188	0
100100000004	2016-11-15 09:55:00	109.222	18.3189	0
100100000004	2016-11-15 09:56:00	109.223	18.319	0
100100000004	2016-11-15 09:56:00	109.225	18.3191	0
100100000004	2016-11-15 09:56:00	109.226	18.3192	0
100100000004	2016-11-15 09:56:00	109.228	18.3193	0
100100000004	2016-11-15 09:56:00	109.229	18.3194	0
100100000004	2016-11-15 09:56:00	109.23	18.3195	0
100100000004	2016-11-15 09:57:00	109.231	18.3195	0
100100000004	2016-11-15 09:57:00	109.232	18.3196	0
100100000004	2016-11-15 09:57:00	109.233	18.3196	0
100100000004	2016-11-15 09:57:00	109.233	18.3196	0
100100000004	2016-11-15 09:57:00	109.234	18.3195	0
100100000004	2016-11-15 09:57:00	109.235	18.3192	0
100100000004	2016-11-15 09:58:00	109.235	18.319	0
100100000004	2016-11-15 09:58:00	109.236	18.319	0
100100000004	2016-11-15 09:58:00	109.236	18.319	0
100100000004	2016-11-15 09:58:00	109.236	18.319	0
100100000004	2016-11-15 09:58:00	109.236	18.319	0
100100000004	2016-11-15 09:58:00	109.236	18.319	0
100100000004	2016-11-15 09:59:00	109.236	18.319	0
100100000004	2016-11-15 09:59:00	109.236	18.319	0
100100000004	2016-11-15 09:59:00	109.236	18.319	0
100100000004	2016-11-15 09:59:00	109.236	18.319	0
100100000004	2016-11-15 09:59:00	109.236	18.319	0
100100000004	2016-11-15 09:59:00	109.236	18.319	0
100100000005	2016-11-15 09:00:00	109.575	18.2862	0
100100000005	2016-11-15 09:00:00	109.575	18.2862	0
100100000005	2016-11-15 09:00:00	109.575	18.2862	0
100100000005	2016-11-15 09:00:00	109.575	18.2862	0
100100000005	2016-11-15 09:00:00	109.575	18.2862	0
100100000005	2016-11-15 09:00:00	109.575	18.2862	0
100100000005	2016-11-15 09:01:00	109.575	18.2862	0
100100000005	2016-11-15 09:01:00	109.575	18.2862	0
100100000005	2016-11-15 09:01:00	109.575	18.2862	0
100100000005	2016-11-15 09:01:00	109.575	18.2862	0
100100000005	2016-11-15 09:01:00	109.575	18.2862	0
100100000005	2016-11-15 09:01:00	109.575	18.2862	0
100100000005	2016-11-15 09:02:00	109.575	18.2862	0
100100000005	2016-11-15 09:02:00	109.575	18.2862	0
100100000005	2016-11-15 09:02:00	109.575	18.2862	0
100100000005	2016-11-15 09:02:00	109.575	18.2862	0
100100000005	2016-11-15 09:02:00	109.575	18.2862	0
100100000005	2016-11-15 09:02:00	109.575	18.2862	0
100100000005	2016-11-15 09:03:00	109.575	18.2862	1
100100000005	2016-11-15 09:03:00	109.575	18.2862	1
100100000005	2016-11-15 09:03:00	109.575	18.2862	1
100100000005	2016-11-15 09:03:00	109.575	18.2862	1
100100000005	2016-11-15 09:03:00	109.576	18.2862	1
100100000005	2016-11-15 09:03:00	109.576	18.2861	1
100100000005	2016-11-15 09:03:00	109.576	18.2853	1
100100000005	2016-11-15 09:03:00	109.576	18.2841	1
100100000005	2016-11-15 09:04:00	109.575	18.2831	1
100100000005	2016-11-15 09:04:00	109.575	18.2827	1
100100000005	2016-11-15 09:04:00	109.575	18.282	1
100100000005	2016-11-15 09:04:00	109.575	18.2819	1
100100000005	2016-11-15 09:04:00	109.576	18.2817	1
100100000005	2016-11-15 09:04:00	109.578	18.2816	1
100100000005	2016-11-15 09:05:00	109.579	18.2818	1
100100000005	2016-11-15 09:05:00	109.58	18.282	1
100100000005	2016-11-15 09:05:00	109.58	18.282	1
100100000005	2016-11-15 09:05:00	109.58	18.2821	1
100100000005	2016-11-15 09:05:00	109.581	18.2822	1
100100000005	2016-11-15 09:05:00	109.581	18.2822	1
100100000005	2016-11-15 09:06:00	109.581	18.2822	1
100100000005	2016-11-15 09:06:00	109.581	18.2822	1
100100000005	2016-11-15 09:06:00	109.581	18.2822	1
100100000005	2016-11-15 09:06:00	109.581	18.2822	1
100100000005	2016-11-15 09:06:00	109.581	18.2822	1
100100000005	2016-11-15 09:06:00	109.581	18.2822	1
100100000005	2016-11-15 09:07:00	109.581	18.2822	1
100100000005	2016-11-15 09:07:00	109.581	18.2822	1
100100000005	2016-11-15 09:07:00	109.581	18.2822	1
100100000005	2016-11-15 09:07:00	109.581	18.2822	1
100100000005	2016-11-15 09:07:00	109.581	18.2823	1
100100000005	2016-11-15 09:07:00	109.581	18.2824	1
100100000005	2016-11-15 09:08:00	109.582	18.2826	1
100100000005	2016-11-15 09:08:00	109.583	18.2829	1
100100000005	2016-11-15 09:08:00	109.584	18.2832	1
100100000005	2016-11-15 09:08:00	109.584	18.2834	1
100100000005	2016-11-15 09:08:00	109.585	18.2835	1
100100000005	2016-11-15 09:08:00	109.586	18.2835	1
100100000005	2016-11-15 09:09:00	109.587	18.2835	1
100100000005	2016-11-15 09:09:00	109.588	18.2835	1
100100000005	2016-11-15 09:09:00	109.588	18.2835	1
100100000005	2016-11-15 09:09:00	109.588	18.2836	1
100100000005	2016-11-15 09:09:00	109.587	18.2836	1
100100000005	2016-11-15 09:09:00	109.587	18.2836	1
100100000005	2016-11-15 09:10:00	109.586	18.2836	1
100100000005	2016-11-15 09:10:00	109.586	18.2836	1
100100000005	2016-11-15 09:10:00	109.586	18.2836	1
100100000005	2016-11-15 09:10:00	109.586	18.2836	1
100100000005	2016-11-15 09:10:00	109.586	18.2836	1
100100000005	2016-11-15 09:10:00	109.586	18.2836	0
100100000005	2016-11-15 09:10:00	109.586	18.2836	0
100100000005	2016-11-15 09:11:00	109.585	18.2836	1
100100000005	2016-11-15 09:11:00	109.585	18.2835	1
100100000005	2016-11-15 09:11:00	109.584	18.2832	1
100100000005	2016-11-15 09:11:00	109.583	18.2831	1
100100000005	2016-11-15 09:11:00	109.583	18.2831	1
100100000005	2016-11-15 09:11:00	109.583	18.2831	1
100100000005	2016-11-15 09:12:00	109.583	18.283	1
100100000005	2016-11-15 09:12:00	109.582	18.2828	1
100100000005	2016-11-15 09:12:00	109.582	18.2828	1
100100000005	2016-11-15 09:12:00	109.582	18.2828	1
100100000005	2016-11-15 09:12:00	109.582	18.2828	1
100100000005	2016-11-15 09:12:00	109.582	18.2828	1
100100000005	2016-11-15 09:13:00	109.582	18.2828	1
100100000005	2016-11-15 09:13:00	109.582	18.2828	1
100100000005	2016-11-15 09:13:00	109.582	18.2827	1
100100000005	2016-11-15 09:13:00	109.581	18.2825	1
100100000005	2016-11-15 09:13:00	109.58	18.2821	1
100100000005	2016-11-15 09:13:00	109.578	18.2818	1
100100000005	2016-11-15 09:14:00	109.576	18.2818	1
100100000005	2016-11-15 09:14:00	109.575	18.282	1
100100000005	2016-11-15 09:14:00	109.575	18.2821	1
100100000005	2016-11-15 09:14:00	109.575	18.2823	1
100100000005	2016-11-15 09:14:00	109.575	18.2831	1
100100000005	2016-11-15 09:14:00	109.576	18.2842	1
100100000005	2016-11-15 09:15:00	109.576	18.2856	1
100100000005	2016-11-15 09:15:00	109.576	18.2862	1
100100000005	2016-11-15 09:15:00	109.575	18.2862	1
100100000005	2016-11-15 09:15:00	109.575	18.2862	1
100100000005	2016-11-15 09:15:00	109.575	18.2862	1
100100000005	2016-11-15 09:15:00	109.575	18.2862	1
100100000005	2016-11-15 09:15:00	109.575	18.2862	1
100100000005	2016-11-15 09:16:00	109.575	18.2862	1
100100000005	2016-11-15 09:16:00	109.575	18.2862	1
100100000005	2016-11-15 09:16:00	109.575	18.2862	1
100100000005	2016-11-15 09:16:00	109.575	18.2862	1
100100000005	2016-11-15 09:16:00	109.575	18.2862	1
100100000005	2016-11-15 09:17:00	109.575	18.2862	1
100100000005	2016-11-15 09:17:00	109.575	18.2862	1
100100000005	2016-11-15 09:17:00	109.575	18.2862	1
100100000005	2016-11-15 09:17:00	109.575	18.2862	1
100100000005	2016-11-15 09:17:00	109.575	18.2862	1
100100000005	2016-11-15 09:17:00	109.575	18.2862	1
100100000005	2016-11-15 09:18:00	109.575	18.2862	1
100100000005	2016-11-15 09:18:00	109.575	18.2862	1
100100000005	2016-11-15 09:18:00	109.575	18.2862	1
100100000005	2016-11-15 09:18:00	109.575	18.2862	1
100100000005	2016-11-15 09:18:00	109.575	18.2862	1
100100000005	2016-11-15 09:18:00	109.575	18.2862	1
100100000005	2016-11-15 09:19:00	109.575	18.2862	1
100100000005	2016-11-15 09:19:00	109.575	18.2862	1
100100000005	2016-11-15 09:19:00	109.575	18.2862	1
100100000005	2016-11-15 09:19:00	109.575	18.2862	1
100100000005	2016-11-15 09:19:00	109.575	18.2862	1
100100000005	2016-11-15 09:19:00	109.575	18.2862	1
100100000005	2016-11-15 09:20:00	109.575	18.2862	1
100100000005	2016-11-15 09:20:00	109.575	18.2862	1
100100000005	2016-11-15 09:20:00	109.575	18.2862	1
100100000005	2016-11-15 09:20:00	109.575	18.2862	1
100100000005	2016-11-15 09:20:00	109.575	18.2862	1
100100000005	2016-11-15 09:20:00	109.575	18.2862	1
100100000005	2016-11-15 09:21:00	109.575	18.2862	1
100100000005	2016-11-15 09:21:00	109.575	18.2862	1
100100000005	2016-11-15 09:21:00	109.575	18.2862	1
100100000005	2016-11-15 09:21:00	109.575	18.2862	1
100100000005	2016-11-15 09:21:00	109.575	18.2862	1
100100000005	2016-11-15 09:21:00	109.575	18.2862	1
100100000005	2016-11-15 09:22:00	109.575	18.2862	1
100100000005	2016-11-15 09:22:00	109.575	18.2862	1
100100000005	2016-11-15 09:22:00	109.575	18.2862	1
100100000005	2016-11-15 09:22:00	109.575	18.2862	1
100100000005	2016-11-15 09:22:00	109.575	18.2862	1
100100000005	2016-11-15 09:22:00	109.575	18.2862	1
100100000005	2016-11-15 09:23:00	109.575	18.2862	1
100100000005	2016-11-15 09:23:00	109.575	18.2862	1
100100000005	2016-11-15 09:23:00	109.575	18.2862	1
100100000005	2016-11-15 09:23:00	109.575	18.2862	1
100100000005	2016-11-15 09:23:00	109.575	18.2862	1
100100000005	2016-11-15 09:23:00	109.575	18.2862	1
100100000005	2016-11-15 09:24:00	109.575	18.2862	1
100100000005	2016-11-15 09:24:00	109.575	18.2862	1
100100000005	2016-11-15 09:24:00	109.575	18.2862	1
100100000005	2016-11-15 09:24:00	109.576	18.2862	1
100100000005	2016-11-15 09:24:00	109.576	18.2862	0
100100000005	2016-11-15 09:24:00	109.576	18.286	0
100100000005	2016-11-15 09:24:00	109.576	18.2852	0
100100000005	2016-11-15 09:24:00	109.575	18.2838	0
100100000005	2016-11-15 09:25:00	109.575	18.2828	0
100100000005	2016-11-15 09:25:00	109.575	18.2826	0
100100000005	2016-11-15 09:25:00	109.575	18.2826	0
100100000005	2016-11-15 09:25:00	109.575	18.2826	0
100100000005	2016-11-15 09:25:00	109.575	18.2826	0
100100000005	2016-11-15 09:25:00	109.575	18.2826	0
100100000005	2016-11-15 09:26:00	109.575	18.2826	0
100100000005	2016-11-15 09:26:00	109.575	18.2824	0
100100000005	2016-11-15 09:26:00	109.575	18.2819	0
100100000005	2016-11-15 09:26:00	109.576	18.2817	0
100100000005	2016-11-15 09:26:00	109.578	18.2816	0
100100000005	2016-11-15 09:26:00	109.58	18.2819	0
100100000005	2016-11-15 09:27:00	109.581	18.2822	0
100100000005	2016-11-15 09:27:00	109.581	18.2823	0
100100000005	2016-11-15 09:27:00	109.581	18.2823	0
100100000005	2016-11-15 09:27:00	109.581	18.2823	0
100100000005	2016-11-15 09:27:00	109.581	18.2823	0
100100000005	2016-11-15 09:27:00	109.581	18.2823	0
100100000005	2016-11-15 09:28:00	109.581	18.2823	0
100100000005	2016-11-15 09:28:00	109.581	18.2823	0
100100000005	2016-11-15 09:28:00	109.581	18.2823	0
100100000005	2016-11-15 09:28:00	109.581	18.2823	0
100100000005	2016-11-15 09:28:00	109.581	18.2823	0
100100000005	2016-11-15 09:28:00	109.581	18.2823	0
100100000005	2016-11-15 09:29:00	109.581	18.2824	0
100100000005	2016-11-15 09:29:00	109.582	18.2828	0
100100000005	2016-11-15 09:29:00	109.583	18.2833	0
100100000005	2016-11-15 09:29:00	109.583	18.2834	0
100100000005	2016-11-15 09:29:00	109.583	18.2834	0
100100000005	2016-11-15 09:29:00	109.583	18.2834	0
100100000005	2016-11-15 09:30:00	109.583	18.2838	0
100100000005	2016-11-15 09:30:00	109.584	18.2841	0
100100000005	2016-11-15 09:30:00	109.584	18.2847	0
100100000005	2016-11-15 09:30:00	109.585	18.2853	0
100100000005	2016-11-15 09:30:00	109.586	18.286	0
100100000005	2016-11-15 09:30:00	109.587	18.2868	0
100100000005	2016-11-15 09:31:00	109.588	18.2876	0
100100000005	2016-11-15 09:31:00	109.588	18.2882	0
100100000005	2016-11-15 09:31:00	109.59	18.2892	0
100100000005	2016-11-15 09:31:00	109.591	18.2902	0
100100000005	2016-11-15 09:31:00	109.592	18.2912	0
100100000005	2016-11-15 09:31:00	109.593	18.2924	0
100100000005	2016-11-15 09:32:00	109.594	18.2934	0
100100000005	2016-11-15 09:32:00	109.595	18.2947	0
100100000005	2016-11-15 09:32:00	109.596	18.2961	0
100100000005	2016-11-15 09:32:00	109.597	18.2975	0
100100000005	2016-11-15 09:32:00	109.598	18.2986	0
100100000005	2016-11-15 09:32:00	109.598	18.2993	0
100100000005	2016-11-15 09:33:00	109.598	18.2999	0
100100000005	2016-11-15 09:33:00	109.597	18.3005	0
100100000005	2016-11-15 09:33:00	109.597	18.3011	0
100100000005	2016-11-15 09:33:00	109.597	18.3017	0
100100000005	2016-11-15 09:33:00	109.598	18.3025	0
100100000005	2016-11-15 09:33:00	109.599	18.3028	0
100100000005	2016-11-15 09:34:00	109.599	18.3029	0
100100000005	2016-11-15 09:34:00	109.599	18.3029	0
100100000005	2016-11-15 09:34:00	109.599	18.3029	0
100100000005	2016-11-15 09:34:00	109.598	18.3029	0
100100000005	2016-11-15 09:34:00	109.598	18.303	0
100100000005	2016-11-15 09:34:00	109.598	18.3035	0
100100000005	2016-11-15 09:34:00	109.598	18.3036	0
100100000005	2016-11-15 09:34:00	109.598	18.3036	0
100100000005	2016-11-15 09:35:00	109.598	18.3036	0
100100000005	2016-11-15 09:35:00	109.598	18.3036	0
100100000005	2016-11-15 09:35:00	109.598	18.3036	0
100100000005	2016-11-15 09:35:00	109.598	18.3036	0
100100000005	2016-11-15 09:36:00	109.598	18.3036	0
100100000005	2016-11-15 09:36:00	109.598	18.3036	0
100100000005	2016-11-15 09:36:00	109.598	18.3036	0
100100000005	2016-11-15 09:36:00	109.598	18.3036	0
100100000005	2016-11-15 09:37:00	109.598	18.3036	0
100100000005	2016-11-15 09:37:00	109.598	18.3036	0
100100000005	2016-11-15 09:37:00	109.598	18.3036	0
100100000005	2016-11-15 09:37:00	109.598	18.3036	0
100100000005	2016-11-15 09:38:00	109.598	18.3036	0
100100000005	2016-11-15 09:38:00	109.598	18.3036	0
100100000005	2016-11-15 09:38:00	109.598	18.3036	0
100100000005	2016-11-15 09:38:00	109.598	18.3036	0
100100000005	2016-11-15 09:39:00	109.598	18.3036	0
100100000005	2016-11-15 09:39:00	109.598	18.3036	0
100100000005	2016-11-15 09:39:00	109.598	18.3036	0
100100000005	2016-11-15 09:39:00	109.598	18.3036	0
100100000005	2016-11-15 09:40:00	109.598	18.3036	0
100100000005	2016-11-15 09:40:00	109.598	18.3036	0
100100000005	2016-11-15 09:40:00	109.598	18.3036	0
100100000005	2016-11-15 09:40:00	109.598	18.3036	0
100100000005	2016-11-15 09:41:00	109.598	18.3036	0
100100000005	2016-11-15 09:41:00	109.598	18.3036	0
100100000005	2016-11-15 09:41:00	109.598	18.3036	0
100100000005	2016-11-15 09:41:00	109.598	18.3036	0
100100000005	2016-11-15 09:42:00	109.598	18.3036	0
100100000005	2016-11-15 09:42:00	109.598	18.3036	0
100100000005	2016-11-15 09:42:00	109.598	18.3036	0
100100000005	2016-11-15 09:42:00	109.598	18.3036	0
100100000005	2016-11-15 09:43:00	109.598	18.3036	0
100100000005	2016-11-15 09:43:00	109.598	18.3036	0
100100000005	2016-11-15 09:43:00	109.598	18.3036	0
100100000005	2016-11-15 09:43:00	109.598	18.3036	0
100100000005	2016-11-15 09:44:00	109.598	18.3036	0
100100000005	2016-11-15 09:44:00	109.598	18.3036	0
100100000005	2016-11-15 09:44:00	109.598	18.3036	0
100100000005	2016-11-15 09:44:00	109.598	18.3036	0
100100000005	2016-11-15 09:45:00	109.598	18.3036	0
100100000005	2016-11-15 09:45:00	109.598	18.3036	0
100100000005	2016-11-15 09:45:00	109.598	18.3036	0
100100000005	2016-11-15 09:45:00	109.598	18.3036	0
100100000005	2016-11-15 09:45:00	109.598	18.3036	0
100100000005	2016-11-15 09:45:00	109.598	18.3036	0
100100000005	2016-11-15 09:46:00	109.598	18.3036	0
100100000005	2016-11-15 09:46:00	109.598	18.3036	0
100100000005	2016-11-15 09:46:00	109.598	18.3036	0
100100000005	2016-11-15 09:46:00	109.598	18.3036	0
100100000005	2016-11-15 09:46:00	109.598	18.3036	0
100100000005	2016-11-15 09:46:00	109.598	18.3036	0
100100000005	2016-11-15 09:47:00	109.598	18.3036	0
100100000005	2016-11-15 09:47:00	109.598	18.3036	0
100100000005	2016-11-15 09:47:00	109.598	18.3036	0
100100000005	2016-11-15 09:47:00	109.598	18.3036	0
100100000005	2016-11-15 09:47:00	109.598	18.3036	0
100100000005	2016-11-15 09:47:00	109.598	18.3036	0
100100000005	2016-11-15 09:48:00	109.598	18.3036	0
100100000005	2016-11-15 09:48:00	109.598	18.3036	0
100100000005	2016-11-15 09:48:00	109.598	18.3036	0
100100000005	2016-11-15 09:48:00	109.598	18.3035	0
100100000005	2016-11-15 09:48:00	109.598	18.3032	0
100100000005	2016-11-15 09:48:00	109.598	18.3029	0
100100000005	2016-11-15 09:49:00	109.598	18.3028	0
100100000005	2016-11-15 09:49:00	109.598	18.3027	0
100100000005	2016-11-15 09:49:00	109.598	18.3025	0
100100000005	2016-11-15 09:49:00	109.598	18.3025	0
100100000005	2016-11-15 09:49:00	109.598	18.3025	0
100100000005	2016-11-15 09:49:00	109.598	18.3025	0
100100000005	2016-11-15 09:49:00	109.598	18.3025	0
100100000005	2016-11-15 09:50:00	109.598	18.3025	0
100100000005	2016-11-15 09:50:00	109.598	18.3025	0
100100000005	2016-11-15 09:50:00	109.598	18.3025	0
100100000005	2016-11-15 09:50:00	109.598	18.3025	0
100100000005	2016-11-15 09:50:00	109.598	18.3025	0
100100000005	2016-11-15 09:50:00	109.598	18.3025	0
100100000005	2016-11-15 09:51:00	109.598	18.3025	0
100100000005	2016-11-15 09:51:00	109.598	18.3026	0
100100000005	2016-11-15 09:51:00	109.599	18.3028	0
100100000005	2016-11-15 09:51:00	109.599	18.3034	0
100100000005	2016-11-15 09:51:00	109.6	18.3036	0
100100000005	2016-11-15 09:51:00	109.601	18.3029	0
100100000005	2016-11-15 09:52:00	109.601	18.3027	0
100100000005	2016-11-15 09:52:00	109.601	18.3027	0
100100000005	2016-11-15 09:52:00	109.601	18.3027	1
100100000005	2016-11-15 09:52:00	109.601	18.3027	1
100100000005	2016-11-15 09:52:00	109.601	18.3027	1
100100000005	2016-11-15 09:52:00	109.601	18.3027	1
100100000005	2016-11-15 09:52:00	109.601	18.3027	1
100100000005	2016-11-15 09:53:00	109.601	18.3026	1
100100000005	2016-11-15 09:53:00	109.602	18.3017	1
100100000005	2016-11-15 09:53:00	109.603	18.3003	1
100100000005	2016-11-15 09:53:00	109.604	18.2984	1
100100000005	2016-11-15 09:53:00	109.604	18.2966	1
100100000005	2016-11-15 09:53:00	109.604	18.2943	1
100100000005	2016-11-15 09:54:00	109.604	18.2916	1
100100000005	2016-11-15 09:54:00	109.604	18.2892	1
100100000005	2016-11-15 09:54:00	109.604	18.2872	1
100100000005	2016-11-15 09:54:00	109.605	18.285	1
100100000005	2016-11-15 09:54:00	109.605	18.2833	1
100100000005	2016-11-15 09:54:00	109.606	18.2819	1
100100000005	2016-11-15 09:55:00	109.606	18.2801	1
100100000005	2016-11-15 09:55:00	109.607	18.2784	1
100100000005	2016-11-15 09:55:00	109.607	18.2776	1
100100000005	2016-11-15 09:55:00	109.607	18.2776	1
100100000005	2016-11-15 09:55:00	109.607	18.2776	1
100100000005	2016-11-15 09:56:00	109.607	18.2776	1
100100000005	2016-11-15 09:56:00	109.607	18.2776	1
100100000005	2016-11-15 09:56:00	109.607	18.2774	1
100100000005	2016-11-15 09:56:00	109.607	18.2761	1
100100000005	2016-11-15 09:56:00	109.608	18.275	1
100100000005	2016-11-15 09:56:00	109.608	18.2731	1
100100000005	2016-11-15 09:57:00	109.609	18.2714	1
100100000005	2016-11-15 09:57:00	109.609	18.2699	1
100100000005	2016-11-15 09:57:00	109.609	18.2686	1
100100000005	2016-11-15 09:57:00	109.608	18.2672	1
100100000005	2016-11-15 09:57:00	109.608	18.2656	1
100100000005	2016-11-15 09:57:00	109.609	18.2643	1
100100000005	2016-11-15 09:58:00	109.61	18.263	1
100100000005	2016-11-15 09:58:00	109.611	18.262	1
100100000005	2016-11-15 09:58:00	109.612	18.2608	1
100100000005	2016-11-15 09:58:00	109.613	18.2592	1
100100000005	2016-11-15 09:58:00	109.614	18.2578	1
100100000005	2016-11-15 09:58:00	109.615	18.2562	1
100100000005	2016-11-15 09:59:00	109.616	18.255	1
100100000005	2016-11-15 09:59:00	109.617	18.254	1
100100000005	2016-11-15 09:59:00	109.618	18.2529	1
100100000005	2016-11-15 09:59:00	109.619	18.2518	1
100100000005	2016-11-15 09:59:00	109.619	18.2507	1
100100000005	2016-11-15 09:59:00	109.62	18.2495	1
100100000006	2016-11-15 09:00:00	109.494	18.2322	0
100100000006	2016-11-15 09:00:00	109.495	18.2326	0
100100000006	2016-11-15 09:00:00	109.496	18.2332	0
100100000006	2016-11-15 09:00:00	109.497	18.2333	0
100100000006	2016-11-15 09:00:00	109.498	18.2333	0
100100000006	2016-11-15 09:00:00	109.498	18.2331	0
100100000006	2016-11-15 09:01:00	109.499	18.2331	0
100100000006	2016-11-15 09:01:00	109.499	18.2329	0
100100000006	2016-11-15 09:01:00	109.5	18.2327	0
100100000006	2016-11-15 09:01:00	109.501	18.2321	0
100100000006	2016-11-15 09:01:00	109.501	18.2314	0
100100000006	2016-11-15 09:01:00	109.502	18.2306	0
100100000006	2016-11-15 09:02:00	109.502	18.2299	0
100100000006	2016-11-15 09:02:00	109.502	18.2293	0
100100000006	2016-11-15 09:02:00	109.503	18.2284	0
100100000006	2016-11-15 09:02:00	109.503	18.2276	0
100100000006	2016-11-15 09:02:00	109.504	18.2275	0
100100000006	2016-11-15 09:02:00	109.504	18.2275	0
100100000006	2016-11-15 09:03:00	109.504	18.2275	0
100100000006	2016-11-15 09:03:00	109.504	18.2275	0
100100000006	2016-11-15 09:03:00	109.504	18.2275	0
100100000006	2016-11-15 09:03:00	109.504	18.2275	0
100100000006	2016-11-15 09:03:00	109.504	18.2275	0
100100000006	2016-11-15 09:03:00	109.504	18.2275	0
100100000006	2016-11-15 09:04:00	109.504	18.2275	0
100100000006	2016-11-15 09:04:00	109.504	18.2275	0
100100000006	2016-11-15 09:04:00	109.504	18.2275	0
100100000006	2016-11-15 09:04:00	109.504	18.2275	0
100100000006	2016-11-15 09:04:00	109.504	18.2275	0
100100000006	2016-11-15 09:04:00	109.504	18.2272	0
100100000006	2016-11-15 09:05:00	109.504	18.2269	0
100100000006	2016-11-15 09:05:00	109.504	18.2264	0
100100000006	2016-11-15 09:05:00	109.504	18.2264	0
100100000006	2016-11-15 09:05:00	109.504	18.2264	0
100100000006	2016-11-15 09:05:00	109.505	18.2263	1
100100000006	2016-11-15 09:05:00	109.505	18.2263	1
100100000006	2016-11-15 09:06:00	109.506	18.2263	1
100100000006	2016-11-15 09:06:00	109.507	18.2262	1
100100000006	2016-11-15 09:06:00	109.507	18.226	1
100100000006	2016-11-15 09:06:00	109.508	18.226	1
100100000006	2016-11-15 09:06:00	109.509	18.2263	1
100100000006	2016-11-15 09:06:00	109.51	18.2264	1
100100000006	2016-11-15 09:07:00	109.511	18.2265	1
100100000006	2016-11-15 09:07:00	109.511	18.2268	1
100100000006	2016-11-15 09:07:00	109.512	18.2274	1
100100000006	2016-11-15 09:07:00	109.513	18.2282	1
100100000006	2016-11-15 09:07:00	109.513	18.2288	1
100100000006	2016-11-15 09:07:00	109.514	18.2289	1
100100000006	2016-11-15 09:08:00	109.514	18.2289	1
100100000006	2016-11-15 09:08:00	109.514	18.2289	1
100100000006	2016-11-15 09:08:00	109.514	18.2289	1
100100000006	2016-11-15 09:08:00	109.514	18.2289	1
100100000006	2016-11-15 09:08:00	109.514	18.2289	1
100100000006	2016-11-15 09:08:00	109.514	18.2289	1
100100000006	2016-11-15 09:09:00	109.515	18.229	1
100100000006	2016-11-15 09:09:00	109.515	18.2292	1
100100000006	2016-11-15 09:09:00	109.515	18.2301	1
100100000006	2016-11-15 09:09:00	109.515	18.2314	1
100100000006	2016-11-15 09:09:00	109.515	18.2325	1
100100000006	2016-11-15 09:09:00	109.515	18.233	1
100100000006	2016-11-15 09:10:00	109.515	18.2332	1
100100000006	2016-11-15 09:10:00	109.515	18.2332	1
100100000006	2016-11-15 09:10:00	109.515	18.2333	1
100100000006	2016-11-15 09:10:00	109.515	18.2338	1
100100000006	2016-11-15 09:10:00	109.514	18.2339	1
100100000006	2016-11-15 09:10:00	109.514	18.2341	1
100100000006	2016-11-15 09:11:00	109.513	18.2344	1
100100000006	2016-11-15 09:11:00	109.512	18.2349	1
100100000006	2016-11-15 09:11:00	109.511	18.2353	1
100100000006	2016-11-15 09:11:00	109.51	18.2357	1
100100000006	2016-11-15 09:11:00	109.509	18.2361	1
100100000006	2016-11-15 09:11:00	109.509	18.2361	1
100100000006	2016-11-15 09:12:00	109.509	18.2362	1
100100000006	2016-11-15 09:12:00	109.508	18.2364	1
100100000006	2016-11-15 09:12:00	109.507	18.2366	1
100100000006	2016-11-15 09:12:00	109.507	18.237	1
100100000006	2016-11-15 09:12:00	109.506	18.2371	1
100100000006	2016-11-15 09:12:00	109.506	18.2373	1
100100000006	2016-11-15 09:13:00	109.506	18.2374	1
100100000006	2016-11-15 09:13:00	109.506	18.2375	1
100100000006	2016-11-15 09:13:00	109.506	18.2382	1
100100000006	2016-11-15 09:13:00	109.506	18.2389	1
100100000006	2016-11-15 09:13:00	109.506	18.2397	1
100100000006	2016-11-15 09:13:00	109.505	18.2403	1
100100000006	2016-11-15 09:13:00	109.505	18.2409	1
100100000006	2016-11-15 09:14:00	109.505	18.2418	1
100100000006	2016-11-15 09:14:00	109.505	18.2425	1
100100000006	2016-11-15 09:14:00	109.505	18.2434	1
100100000006	2016-11-15 09:14:00	109.505	18.2445	1
100100000006	2016-11-15 09:14:00	109.505	18.2455	1
100100000006	2016-11-15 09:14:00	109.505	18.2462	1
100100000006	2016-11-15 09:15:00	109.505	18.247	1
100100000006	2016-11-15 09:15:00	109.505	18.2481	1
100100000006	2016-11-15 09:15:00	109.505	18.2492	1
100100000006	2016-11-15 09:15:00	109.504	18.2501	1
100100000006	2016-11-15 09:15:00	109.504	18.2509	1
100100000006	2016-11-15 09:15:00	109.504	18.2518	1
100100000006	2016-11-15 09:16:00	109.504	18.2526	1
100100000006	2016-11-15 09:16:00	109.504	18.2532	1
100100000006	2016-11-15 09:16:00	109.504	18.2532	1
100100000006	2016-11-15 09:16:00	109.504	18.2532	1
100100000006	2016-11-15 09:16:00	109.504	18.2532	1
100100000006	2016-11-15 09:16:00	109.504	18.2532	1
100100000006	2016-11-15 09:17:00	109.504	18.2532	1
100100000006	2016-11-15 09:17:00	109.504	18.2532	1
100100000006	2016-11-15 09:17:00	109.504	18.2532	1
100100000006	2016-11-15 09:17:00	109.504	18.2535	1
100100000006	2016-11-15 09:17:00	109.503	18.2534	1
100100000006	2016-11-15 09:17:00	109.502	18.2532	1
100100000006	2016-11-15 09:18:00	109.502	18.2531	1
100100000006	2016-11-15 09:18:00	109.501	18.253	1
100100000006	2016-11-15 09:18:00	109.501	18.253	1
100100000006	2016-11-15 09:18:00	109.5	18.2532	1
100100000006	2016-11-15 09:18:00	109.5	18.2539	1
100100000006	2016-11-15 09:18:00	109.5	18.2547	1
100100000006	2016-11-15 09:19:00	109.5	18.2549	1
100100000006	2016-11-15 09:19:00	109.5	18.255	1
100100000006	2016-11-15 09:19:00	109.5	18.2553	1
100100000006	2016-11-15 09:19:00	109.5	18.2557	1
100100000006	2016-11-15 09:19:00	109.5	18.2557	1
100100000006	2016-11-15 09:19:00	109.5	18.2557	1
100100000006	2016-11-15 09:20:00	109.5	18.2557	1
100100000006	2016-11-15 09:20:00	109.5	18.2557	1
100100000006	2016-11-15 09:20:00	109.5	18.2557	1
100100000006	2016-11-15 09:20:00	109.5	18.2557	1
100100000006	2016-11-15 09:20:00	109.5	18.2557	1
100100000006	2016-11-15 09:20:00	109.5	18.2557	1
100100000006	2016-11-15 09:21:00	109.5	18.2557	1
100100000006	2016-11-15 09:21:00	109.5	18.2557	1
100100000006	2016-11-15 09:21:00	109.5	18.2557	1
100100000006	2016-11-15 09:21:00	109.5	18.2559	1
100100000006	2016-11-15 09:21:00	109.5	18.2565	1
100100000006	2016-11-15 09:21:00	109.499	18.2574	1
100100000006	2016-11-15 09:22:00	109.499	18.2583	1
100100000006	2016-11-15 09:22:00	109.499	18.259	1
100100000006	2016-11-15 09:22:00	109.499	18.2602	1
100100000006	2016-11-15 09:22:00	109.499	18.261	1
100100000006	2016-11-15 09:22:00	109.499	18.2614	1
100100000006	2016-11-15 09:22:00	109.499	18.2614	1
100100000006	2016-11-15 09:23:00	109.499	18.2614	1
100100000006	2016-11-15 09:23:00	109.499	18.2614	1
100100000006	2016-11-15 09:23:00	109.499	18.2614	1
100100000006	2016-11-15 09:23:00	109.498	18.2619	1
100100000006	2016-11-15 09:23:00	109.498	18.2626	1
100100000006	2016-11-15 09:23:00	109.497	18.2631	1
100100000006	2016-11-15 09:24:00	109.497	18.2637	1
100100000006	2016-11-15 09:24:00	109.496	18.2645	1
100100000006	2016-11-15 09:24:00	109.496	18.2651	1
100100000006	2016-11-15 09:24:00	109.495	18.2652	1
100100000006	2016-11-15 09:24:00	109.495	18.2652	1
100100000006	2016-11-15 09:24:00	109.495	18.2652	1
100100000006	2016-11-15 09:25:00	109.495	18.2652	1
100100000006	2016-11-15 09:25:00	109.495	18.2652	1
100100000006	2016-11-15 09:25:00	109.495	18.2652	1
100100000006	2016-11-15 09:25:00	109.495	18.2652	1
100100000006	2016-11-15 09:25:00	109.495	18.2652	1
100100000006	2016-11-15 09:25:00	109.495	18.2652	1
100100000006	2016-11-15 09:26:00	109.495	18.2652	1
100100000006	2016-11-15 09:26:00	109.495	18.2652	1
100100000006	2016-11-15 09:26:00	109.495	18.2652	1
100100000006	2016-11-15 09:26:00	109.495	18.2652	1
100100000006	2016-11-15 09:26:00	109.495	18.2657	1
100100000006	2016-11-15 09:26:00	109.494	18.2664	1
100100000006	2016-11-15 09:27:00	109.493	18.2673	1
100100000006	2016-11-15 09:27:00	109.493	18.268	1
100100000006	2016-11-15 09:27:00	109.492	18.2683	1
100100000006	2016-11-15 09:27:00	109.492	18.2684	1
100100000006	2016-11-15 09:27:00	109.492	18.2684	1
100100000006	2016-11-15 09:27:00	109.492	18.2684	1
100100000006	2016-11-15 09:28:00	109.492	18.2685	1
100100000006	2016-11-15 09:28:00	109.492	18.2685	1
100100000006	2016-11-15 09:28:00	109.492	18.2685	1
100100000006	2016-11-15 09:28:00	109.492	18.2685	1
100100000006	2016-11-15 09:28:00	109.492	18.2685	1
100100000006	2016-11-15 09:28:00	109.492	18.2685	1
100100000006	2016-11-15 09:29:00	109.492	18.2688	1
100100000006	2016-11-15 09:29:00	109.492	18.2689	1
100100000006	2016-11-15 09:29:00	109.492	18.269	1
100100000006	2016-11-15 09:29:00	109.492	18.269	1
100100000006	2016-11-15 09:29:00	109.492	18.269	1
100100000006	2016-11-15 09:29:00	109.492	18.269	1
100100000006	2016-11-15 09:30:00	109.492	18.269	1
100100000006	2016-11-15 09:30:00	109.491	18.2693	1
100100000006	2016-11-15 09:30:00	109.491	18.2693	1
100100000006	2016-11-15 09:30:00	109.491	18.2693	1
100100000006	2016-11-15 09:30:00	109.491	18.2693	1
100100000006	2016-11-15 09:30:00	109.491	18.2693	1
100100000006	2016-11-15 09:31:00	109.491	18.2693	1
100100000006	2016-11-15 09:31:00	109.491	18.2693	1
100100000006	2016-11-15 09:31:00	109.491	18.2693	1
100100000006	2016-11-15 09:31:00	109.491	18.2693	1
100100000006	2016-11-15 09:31:00	109.491	18.2693	1
100100000006	2016-11-15 09:31:00	109.491	18.2693	1
100100000006	2016-11-15 09:32:00	109.491	18.2696	1
100100000006	2016-11-15 09:32:00	109.491	18.2697	1
100100000006	2016-11-15 09:32:00	109.491	18.2698	1
100100000006	2016-11-15 09:32:00	109.491	18.2699	1
100100000006	2016-11-15 09:32:00	109.49	18.27	1
100100000006	2016-11-15 09:32:00	109.49	18.27	1
100100000006	2016-11-15 09:33:00	109.49	18.27	1
100100000006	2016-11-15 09:33:00	109.49	18.27	1
100100000006	2016-11-15 09:33:00	109.49	18.2702	1
100100000006	2016-11-15 09:33:00	109.49	18.2702	1
100100000006	2016-11-15 09:33:00	109.49	18.2702	1
100100000006	2016-11-15 09:33:00	109.49	18.2702	1
100100000006	2016-11-15 09:34:00	109.49	18.2702	1
100100000006	2016-11-15 09:34:00	109.49	18.2702	1
100100000006	2016-11-15 09:34:00	109.49	18.2705	1
100100000006	2016-11-15 09:34:00	109.49	18.2706	1
100100000006	2016-11-15 09:34:00	109.49	18.2707	1
100100000006	2016-11-15 09:34:00	109.49	18.2707	1
100100000006	2016-11-15 09:35:00	109.49	18.2707	1
100100000006	2016-11-15 09:35:00	109.49	18.2707	1
100100000006	2016-11-15 09:35:00	109.49	18.2707	0
100100000006	2016-11-15 09:35:00	109.49	18.2707	0
[truncated: 14,492 more rows]

## Sheet: Original
No	Time	Longitude	Latitude	Passenger
1	0	109.528	18.2974	0
1	1	109.527	18.2995	0
1	2	109.527	18.2997	0
1	3	109.527	18.3047	0
1	4	109.527	18.3087	0
1	5	109.527	18.3135	0
1	6	109.533	18.3158	0
1	7	109.547	18.3177	0
1	8	109.56	18.3209	0
1	9	109.573	18.3196	0
1	10	109.579	18.3199	0
1	11	109.599	18.3233	0
1	12	109.601	18.3237	0
1	13	109.614	18.3246	0
1	14	109.624	18.3233	0
1	15	109.635	18.3276	0
1	16	109.646	18.3304	0
1	17	109.653	18.3292	0
1	18	109.655	18.3278	0
1	19	109.671	18.3215	0
1	20	109.683	18.3276	0
1	21	109.695	18.3387	0
1	22	109.703	18.3507	0
1	23	109.709	18.3631	0
1	24	109.717	18.3747	0
1	25	109.725	18.3823	0
1	26	109.729	18.3883	0
1	27	109.735	18.3918	0
1	28	109.74	18.3949	0
1	29	109.744	18.399	0
1	30	109.747	18.4011	0
1	31	109.749	18.4023	0
1	32	109.751	18.4042	0
1	33	109.752	18.4082	0
1	34	109.756	18.4088	0
1	35	109.757	18.409	0
1	36	109.758	18.4096	0
1	37	109.758	18.4102	0
1	38	109.757	18.4092	0
1	39	109.757	18.4089	0
1	40	109.757	18.4089	0
1	41	109.757	18.4089	0
1	42	109.755	18.4088	0
1	43	109.752	18.4081	0
1	44	109.75	18.404	0
1	45	109.748	18.4018	0
1	46	109.745	18.4005	0
1	47	109.745	18.4003	0
1	48	109.744	18.3992	0
1	49	109.743	18.3981	0
1	50	109.742	18.3976	0
1	51	109.742	18.3975	0
1	52	109.742	18.3975	0
1	53	109.742	18.3973	1
1	54	109.739	18.3942	1
1	55	109.735	18.3918	1
1	56	109.73	18.3892	1
1	57	109.724	18.3818	1
1	58	109.714	18.3717	1
1	59	109.706	18.3573	1
2	0	109.504	18.2855	1
2	1	109.5	18.2881	1
2	2	109.496	18.2892	1
2	3	109.491	18.2893	1
2	4	109.484	18.2911	1
2	5	109.484	18.2957	1
2	6	109.489	18.2963	1
2	7	109.489	18.2974	1
2	8	109.489	18.2974	0
2	9	109.489	18.2974	0
2	10	109.489	18.2974	0
2	11	109.489	18.2974	0
2	12	109.489	18.2974	0
2	13	109.489	18.2975	0
2	14	109.489	18.2974	0
2	15	109.489	18.2974	0
2	16	109.489	18.2974	0
2	17	109.489	18.2974	0
2	18	109.489	18.2974	0
2	19	109.489	18.2974	0
2	20	109.489	18.2974	0
2	21	109.489	18.2974	0
2	22	109.488	18.2974	0
2	23	109.488	18.2974	0
2	24	109.488	18.2974	1
2	25	109.486	18.2963	1
2	26	109.483	18.2962	1
2	27	109.484	18.2938	1
2	28	109.485	18.2887	1
2	29	109.488	18.2847	1
2	30	109.491	18.281	1
2	31	109.491	18.277	1
2	32	109.489	18.2739	1
2	33	109.487	18.2718	1
2	34	109.487	18.2694	1
2	35	109.487	18.2692	1
2	36	109.486	18.2684	1
2	37	109.487	18.2684	1
2	38	109.487	18.2688	1
2	39	109.486	18.2703	0
2	40	109.485	18.2703	0
2	41	109.483	18.2683	0
2	42	109.485	18.266	0
2	43	109.489	18.2629	1
2	44	109.491	18.2619	1
2	45	109.494	18.264	1
2	46	109.494	18.2647	1
2	47	109.495	18.265	1
2	48	109.495	18.265	1
2	49	109.495	18.2653	1
2	50	109.497	18.267	1
2	51	109.498	18.2677	1
2	52	109.5	18.2676	1
2	53	109.503	18.2642	1
2	54	109.506	18.2608	1
2	55	109.508	18.2602	1
2	56	109.51	18.2595	1
2	57	109.509	18.257	1
2	58	109.509	18.2551	1
2	59	109.509	18.2543	1
3	0	109.502	18.2658	1
3	1	109.501	18.267	1
3	2	109.5	18.2684	1
3	3	109.502	18.2709	1
3	4	109.506	18.2746	1
3	5	109.508	18.2764	1
3	6	109.509	18.2769	1
3	7	109.506	18.2801	1
3	8	109.501	18.2854	1
3	9	109.5	18.2876	1
3	10	109.505	18.2913	1
3	11	109.511	18.2938	1
3	12	109.513	18.2949	1
3	13	109.514	18.2951	1
3	14	109.52	18.2974	1
3	15	109.524	18.2985	1
3	16	109.527	18.2996	1
3	17	109.527	18.2997	1
3	18	109.531	18.3005	1
3	19	109.536	18.2997	1
3	20	109.539	18.2986	1
3	21	109.539	18.2978	1
3	22	109.54	18.2964	1
3	23	109.542	18.2964	1
3	24	109.546	18.2988	1
3	25	109.548	18.2985	1
3	26	109.548	18.2987	1
3	27	109.548	18.2986	0
3	28	109.546	18.2986	0
3	29	109.544	18.298	0
3	30	109.542	18.2955	0
3	31	109.54	18.2964	0
3	32	109.539	18.2982	0
3	33	109.538	18.2988	0
3	34	109.538	18.2989	0
3	35	109.538	18.2989	0
3	36	109.538	18.2989	0
3	37	109.538	18.2989	0
3	38	109.538	18.2989	0
3	39	109.537	18.2994	0
3	40	109.533	18.3007	0
3	41	109.533	18.3008	1
3	42	109.529	18.3003	1
3	43	109.528	18.2986	1
3	44	109.527	18.2919	1
3	45	109.525	18.2903	1
3	46	109.525	18.2897	1
3	47	109.526	18.2838	1
3	48	109.524	18.2778	1
3	49	109.524	18.2743	1
3	50	109.517	18.2716	1
3	51	109.515	18.2704	1
3	52	109.514	18.2686	1
3	53	109.511	18.2648	1
3	54	109.507	18.2612	1
3	55	109.507	18.2605	1
3	56	109.506	18.255	1
3	57	109.504	18.2535	1
3	58	109.502	18.2531	1
3	59	109.502	18.2531	1
4	0	109.602	18.3012	1
4	1	109.599	18.3047	1
4	2	109.594	18.3089	1
4	3	109.589	18.3117	1
4	4	109.581	18.3178	1
4	5	109.576	18.3202	1
4	6	109.564	18.3206	1
4	7	109.55	18.3188	1
4	8	109.536	18.3162	1
4	9	109.523	18.3167	1
4	10	109.513	18.3229	1
4	11	109.509	18.326	1
4	12	109.492	18.3246	1
4	13	109.479	18.3245	1
4	14	109.466	18.3248	1
4	15	109.454	18.3209	1
4	16	109.441	18.3167	1
4	17	109.43	18.3172	1
4	18	109.419	18.3172	1
4	19	109.409	18.3177	1
4	20	109.396	18.3207	1
4	21	109.383	18.3194	1
4	22	109.371	18.3133	1
4	23	109.36	18.317	1
4	24	109.351	18.3238	1
4	25	109.339	18.3208	1
4	26	109.327	18.3176	1
4	27	109.314	18.3208	1
4	28	109.3	18.3201	1
4	29	109.287	18.3152	1
4	30	109.275	18.3134	1
4	31	109.265	18.3206	1
4	32	109.253	18.3218	1
4	33	109.245	18.3204	1
4	34	109.242	18.3178	1
4	35	109.237	18.3179	1
4	36	109.236	18.319	1
4	37	109.236	18.319	1
4	38	109.236	18.319	1
4	39	109.236	18.319	1
4	40	109.236	18.319	1
4	41	109.236	18.319	1
4	42	109.236	18.319	1
4	43	109.234	18.3193	1
4	44	109.226	18.3192	1
4	45	109.217	18.3185	1
4	46	109.209	18.3188	1
4	47	109.205	18.3164	1
4	48	109.205	18.3107	1
4	49	109.205	18.308	1
4	50	109.205	18.3072	1
4	51	109.205	18.3089	1
4	52	109.206	18.3124	0
4	53	109.206	18.318	0
4	54	109.211	18.3186	0
4	55	109.218	18.3186	0
4	56	109.227	18.3193	0
4	57	109.233	18.3195	0
4	58	109.236	18.319	0
4	59	109.236	18.319	0
5	0	109.575	18.2862	0
5	1	109.575	18.2862	0
5	2	109.575	18.2862	0
5	3	109.576	18.2858	1
5	4	109.576	18.2822	1
5	5	109.58	18.282	1
5	6	109.581	18.2822	1
5	7	109.581	18.2823	1
5	8	109.584	18.2832	1
5	9	109.587	18.2835	1
5	10	109.586	18.2836	1
5	11	109.584	18.2833	1
5	12	109.582	18.2828	1
5	13	109.581	18.2824	1
5	14	109.575	18.2826	1
5	15	109.576	18.2861	1
5	16	109.575	18.2862	1
5	17	109.575	18.2862	1
5	18	109.575	18.2862	1
5	19	109.575	18.2862	1
5	20	109.575	18.2862	1
5	21	109.575	18.2862	1
5	22	109.575	18.2862	1
5	23	109.575	18.2862	1
5	24	109.576	18.2858	1
5	25	109.575	18.2826	0
5	26	109.577	18.282	0
5	27	109.581	18.2823	0
5	28	109.581	18.2823	0
5	29	109.582	18.2831	0
5	30	109.585	18.2851	0
5	31	109.59	18.2898	0
5	32	109.597	18.2966	0
5	33	109.597	18.3014	0
5	34	109.598	18.3032	0
5	35	109.598	18.3036	0
5	36	109.598	18.3036	0
5	37	109.598	18.3036	0
5	38	109.598	18.3036	0
5	39	109.598	18.3036	0
5	40	109.598	18.3036	0
5	41	109.598	18.3036	0
5	42	109.598	18.3036	0
5	43	109.598	18.3036	0
5	44	109.598	18.3036	0
5	45	109.598	18.3036	0
5	46	109.598	18.3036	0
5	47	109.598	18.3036	0
5	48	109.598	18.3034	0
5	49	109.598	18.3026	0
5	50	109.598	18.3025	0
5	51	109.599	18.303	0
5	52	109.601	18.3027	1
5	53	109.603	18.299	1
5	54	109.605	18.2864	1
5	55	109.607	18.2783	1
5	56	109.607	18.2761	1
5	57	109.609	18.2678	1
5	58	109.613	18.2598	1
5	59	109.618	18.2523	1
6	0	109.496	18.233	0
6	1	109.5	18.2321	0
6	2	109.503	18.2284	0
6	3	109.504	18.2275	0
6	4	109.504	18.2275	0
6	5	109.504	18.2265	1
6	6	109.508	18.2262	1
6	7	109.512	18.2278	1
6	8	109.514	18.2289	1
6	9	109.515	18.2309	1
6	10	109.515	18.2336	1
6	11	109.51	18.2354	1
6	12	109.507	18.2368	1
6	13	109.506	18.239	1
6	14	109.505	18.244	1
6	15	109.505	18.2495	1
6	16	109.504	18.2531	1
6	17	109.504	18.2533	1
6	18	109.501	18.2535	1
6	19	109.5	18.2554	1
6	20	109.5	18.2557	1
6	21	109.5	18.2561	1
6	22	109.499	18.2602	1
6	23	109.498	18.262	1
6	24	109.496	18.2648	1
6	25	109.495	18.2652	1
6	26	109.495	18.2655	1
6	27	109.492	18.2681	1
6	28	109.492	18.2685	1
6	29	109.492	18.2689	1
6	30	109.491	18.2692	1
6	31	109.491	18.2693	1
6	32	109.491	18.2698	1
6	33	109.49	18.2702	1
6	34	109.49	18.2705	1
6	35	109.49	18.2707	1
6	36	109.489	18.2712	1
6	37	109.488	18.2724	1
6	38	109.488	18.2729	1
6	39	109.491	18.2777	1
6	40	109.493	18.2799	1
6	41	109.496	18.2831	1
6	42	109.498	18.2858	1
6	43	109.498	18.2861	1
6	44	109.499	18.2866	1
6	45	109.499	18.2866	1
6	46	109.499	18.2875	1
6	47	109.496	18.2896	1
6	48	109.495	18.2928	1
6	49	109.495	18.2946	1
6	50	109.495	18.2972	0
6	51	109.492	18.2963	0
6	52	109.49	18.2966	0
6	53	109.49	18.2967	0
6	54	109.49	18.2967	0
6	55	109.49	18.2968	0
6	56	109.49	18.2969	0
6	57	109.49	18.2971	0
6	58	109.49	18.2973	0
6	59	109.49	18.2974	0
7	0	109.51	18.2707	0
7	1	109.51	18.2707	0
7	2	109.51	18.2707	0
7	3	109.51	18.2707	0
7	4	109.51	18.2707	0
7	5	109.51	18.2707	0
7	6	109.51	18.2707	0
7	7	109.51	18.2707	0
7	8	109.51	18.2707	0
7	9	109.51	18.2707	0
7	10	109.51	18.2707	0
7	11	109.51	18.2707	0
7	12	109.51	18.2707	0
7	13	109.51	18.2705	0
7	14	109.51	18.2704	0
7	15	109.51	18.2705	0
7	16	109.51	18.2705	0
7	17	109.509	18.2708	0
7	18	109.508	18.2729	0
7	19	109.506	18.2747	1
7	20	109.508	18.2766	1
7	21	109.509	18.2769	1
7	22	109.509	18.277	1
7	23	109.512	18.2793	1
7	24	109.516	18.2832	1
7	25	109.522	18.2882	1
7	26	109.523	18.2891	1
7	27	109.523	18.2889	1
7	28	109.521	18.2877	1
7	29	109.516	18.283	1
7	30	109.512	18.2802	1
7	31	109.511	18.2785	1
7	32	109.51	18.2781	1
7	33	109.51	18.2777	1
7	34	109.51	18.2777	1
7	35	109.509	18.2773	1
7	36	109.512	18.2736	1
7	37	109.514	18.2718	1
7	38	109.514	18.27	1
7	39	109.511	18.265	1
7	40	109.507	18.2611	1
7	41	109.507	18.2601	1
7	42	109.507	18.2551	1
7	43	109.504	18.2548	1
7	44	109.501	18.259	1
7	45	109.499	18.2617	1
7	46	109.499	18.2619	1
7	47	109.499	18.2608	1
7	48	109.499	18.2568	1
7	49	109.499	18.2558	1
7	50	109.497	18.2554	0
7	51	109.496	18.2548	0
7	52	109.497	18.2507	0
7	53	109.498	18.2479	0
7	54	109.5	18.2457	0
7	55	109.5	18.2452	1
7	56	109.499	18.2485	1
7	57	109.498	18.2514	1
7	58	109.498	18.2524	1
7	59	109.497	18.2541	1
8	0	109.534	18.2993	1
8	1	109.532	18.3003	1
8	2	109.528	18.2997	1
8	3	109.522	18.2978	1
8	4	109.518	18.2964	1
8	5	109.513	18.2947	1
8	6	109.509	18.2929	1
8	7	109.502	18.2897	1
8	8	109.498	18.2884	1
8	9	109.495	18.2898	1
8	10	109.495	18.2934	1
8	11	109.496	18.2968	1
8	12	109.493	18.2968	1
8	13	109.49	18.2968	1
8	14	109.49	18.2969	1
8	15	109.49	18.2969	1
8	16	109.49	18.2969	1
8	17	109.49	18.2969	1
8	18	109.49	18.2969	1
8	19	109.49	18.2969	1
8	20	109.49	18.2969	1
8	21	109.49	18.2969	1
8	22	109.49	18.2969	0
8	23	109.49	18.2969	0
8	24	109.49	18.2969	0
8	25	109.49	18.2969	0
8	26	109.49	18.2969	0
8	27	109.49	18.2969	0
8	28	109.49	18.2969	0
8	29	109.49	18.2969	0
8	30	109.49	18.2969	0
8	31	109.489	18.2972	1
8	32	109.488	18.2973	1
8	33	109.492	18.296	1
8	34	109.495	18.2923	1
8	35	109.495	18.2908	1
8	36	109.495	18.2908	1
8	37	109.498	18.2887	1
8	38	109.501	18.2859	1
8	39	109.506	18.2798	1
8	40	109.508	18.2774	1
8	41	109.511	18.2745	1
8	42	109.514	18.2712	1
8	43	109.514	18.2708	1
8	44	109.515	18.2697	1
8	45	109.516	18.2695	1
8	46	109.516	18.2695	1
8	47	109.516	18.2695	1
8	48	109.516	18.2695	1
8	49	109.516	18.2695	1
8	50	109.516	18.2695	1
8	51	109.55	18.2387	1
8	52	109.546	18.2351	1
8	53	109.545	18.2331	1
8	54	109.545	18.2318	0
8	55	109.545	18.2319	0
8	56	109.545	18.2319	0
8	57	109.545	18.2319	0
8	58	109.545	18.2319	0
8	59	109.545	18.2319	0
9	0	109.483	18.2894	1
9	1	109.48	18.2895	1
9	2	109.477	18.2898	0
9	3	109.473	18.2909	0
9	4	109.48	18.2893	0
9	5	109.485	18.2883	0
9	6	109.488	18.2846	0
9	7	109.49	18.2831	0
9	8	109.492	18.2801	0
9	9	109.491	18.2768	0
9	10	109.488	18.2734	0
9	11	109.488	18.2718	0
9	12	109.489	18.2709	0
9	13	109.49	18.2707	0
9	14	109.49	18.2704	1
9	15	109.492	18.2689	1
9	16	109.494	18.2665	1
9	17	109.497	18.267	1
9	18	109.499	18.2686	1
9	19	109.499	18.2687	1
9	20	109.501	18.2704	1
9	21	109.505	18.2737	1
9	22	109.508	18.2762	1
9	23	109.51	18.2777	1
9	24	109.514	18.281	1
9	25	109.519	18.2855	1
9	26	109.523	18.2891	1
9	27	109.524	18.2898	1
9	28	109.528	18.292	1
9	29	109.535	18.2938	1
9	30	109.537	18.295	1
9	31	109.538	18.3004	1
9	32	109.54	18.3071	1
9	33	109.543	18.3138	1
9	34	109.544	18.3183	1
9	35	109.541	18.324	1
9	36	109.546	18.3282	1
9	37	109.554	18.3281	1
9	38	109.556	18.3279	1
9	39	109.557	18.3279	0
9	40	109.557	18.3279	0
9	41	109.557	18.3279	0
9	42	109.557	18.3279	1
9	43	109.555	18.328	1
9	44	109.553	18.3281	1
9	45	109.55	18.3283	1
9	46	109.543	18.3273	1
9	47	109.542	18.3211	1
9	48	109.543	18.3154	1
9	49	109.54	18.3072	1
9	50	109.538	18.2995	1
9	51	109.536	18.2945	1
9	52	109.531	18.2932	1
9	53	109.527	18.2913	1
9	54	109.525	18.2905	1
9	55	109.522	18.2879	1
9	56	109.515	18.2826	1
9	57	109.511	18.2786	1
9	58	109.509	18.2775	1
9	59	109.507	18.2754	1
10	0	109.694	18.3302	1
10	1	109.692	18.322	1
10	2	109.691	18.3108	1
10	3	109.692	18.3016	1
10	4	109.693	18.3001	1
10	5	109.694	18.2993	1
10	6	109.7	18.2965	1
10	7	109.703	18.2956	1
10	8	109.706	18.2949	1
10	9	109.71	18.2929	1
10	10	109.711	18.2918	1
10	11	109.711	18.2917	1
10	12	109.711	18.2914	1
10	13	109.711	18.2914	1
10	14	109.711	18.2914	1
10	15	109.711	18.2914	1
10	16	109.71	18.2931	0
10	17	109.71	18.2943	0
10	18	109.717	18.2938	0
10	19	109.719	18.2979	0
10	20	109.722	18.3055	0
10	21	109.725	18.3132	0
10	22	109.726	18.3181	0
10	23	109.722	18.3195	0
10	24	109.715	18.3217	0
10	25	109.713	18.3218	0
10	26	109.71	18.3221	0
10	27	109.703	18.3239	0
10	28	109.703	18.3242	0
10	29	109.702	18.3228	0
10	30	109.7	18.3176	0
10	31	109.699	18.3135	0
10	32	109.698	18.3109	0
10	33	109.698	18.3116	0
10	34	109.698	18.3116	0
10	35	109.698	18.3116	0
10	36	109.698	18.3116	0
10	37	109.699	18.3117	0
10	38	109.699	18.3117	0
10	39	109.699	18.3117	0
10	40	109.699	18.3117	0
10	41	109.699	18.3119	0
10	42	109.699	18.3136	0
10	43	109.699	18.3138	0
10	44	109.698	18.3105	1
10	45	109.699	18.3117	1
10	46	109.699	18.3117	1
10	47	109.699	18.3117	1
10	48	109.699	18.3117	1
10	49	109.699	18.312	1
10	50	109.7	18.3156	1
10	51	109.701	18.3205	1
10	52	109.705	18.3231	1
10	53	109.715	18.3214	1
10	54	109.724	18.319	1
10	55	109.726	18.3217	1
10	56	109.727	18.3228	1
10	57	109.727	18.325	0
10	58	109.728	18.3294	0
10	59	109.73	18.3342	0
11	0	109.491	18.2961	1
11	1	109.491	18.2961	1
11	2	109.491	18.2961	1
11	3	109.491	18.2961	1
11	4	109.491	18.2961	1
11	5	109.491	18.2961	1
11	6	109.491	18.2961	1
11	7	109.491	18.2961	1
11	8	109.491	18.2961	1
11	9	109.491	18.2961	1
11	10	109.491	18.2961	1
11	11	109.491	18.2961	1
11	12	109.491	18.2961	1
11	13	109.491	18.2961	1
11	14	109.49	18.2962	1
11	15	109.486	18.2963	1
11	16	109.483	18.2993	1
11	17	109.484	18.3071	1
11	18	109.487	18.3156	1
11	19	109.49	18.3217	1
11	20	109.487	18.3244	1
11	21	109.476	18.3246	1
11	22	109.462	18.3241	1
11	23	109.449	18.3188	1
11	24	109.436	18.3165	1
11	25	109.427	18.3175	1
11	26	109.415	18.317	1
11	27	109.403	18.319	1
11	28	109.388	18.3209	1
11	29	109.374	18.3146	1
11	30	109.361	18.3157	1
11	31	109.351	18.3238	1
11	32	109.339	18.3209	1
11	33	109.326	18.3177	1
11	34	109.312	18.3211	1
11	35	109.297	18.3189	1
11	36	109.282	18.3135	1
11	37	109.269	18.3167	1
11	38	109.258	18.3223	1
11	39	109.248	18.321	1
11	40	109.243	18.3196	1
11	41	109.24	18.317	1
11	42	109.23	18.3192	1
11	43	109.222	18.3189	1
11	44	109.213	18.3184	1
11	45	109.206	18.3184	1
11	46	109.205	18.3129	1
11	47	109.205	18.3105	1
11	48	109.205	18.3082	1
11	49	109.205	18.3076	1
11	50	109.205	18.3074	1
11	51	109.205	18.3088	0
11	52	109.206	18.3107	0
11	53	109.206	18.3154	0
11	54	109.207	18.3188	0
11	55	109.214	18.3184	0
11	56	109.221	18.3188	0
11	57	109.23	18.3194	0
11	58	109.235	18.3191	0
11	59	109.238	18.3174	0
12	0	109.431	18.2894	0
12	1	109.431	18.2894	0
12	2	109.431	18.2894	0
12	3	109.431	18.2894	0
12	4	109.431	18.2894	0
12	5	109.431	18.2894	0
12	6	109.431	18.2894	0
12	7	109.431	18.2894	0
12	8	109.431	18.2894	0
12	9	109.431	18.2893	1
12	10	109.434	18.2891	1
12	11	109.436	18.2888	1
12	12	109.439	18.2883	1
12	13	109.446	18.2868	1
12	14	109.452	18.2849	1
12	15	109.456	18.2836	1
12	16	109.464	18.2805	1
12	17	109.472	18.276	1
12	18	109.479	18.2717	1
12	19	109.482	18.2689	1
12	20	109.483	18.2678	1
12	21	109.487	18.2643	1
12	22	109.49	18.2613	1
12	23	109.492	18.2591	1
12	24	109.494	18.2566	1
12	25	109.496	18.2552	1
12	26	109.497	18.2555	1
12	27	109.496	18.257	0
12	28	109.495	18.2592	0
12	29	109.494	18.2589	0
12	30	109.494	18.2589	0
12	31	109.494	18.2589	0
12	32	109.494	18.2589	0
12	33	109.494	18.2589	0
12	34	109.494	18.2589	0
12	35	109.494	18.2588	0
12	36	109.494	18.2587	0
12	37	109.494	18.2587	0
12	38	109.494	18.2587	0
12	39	109.494	18.2587	0
12	40	109.494	18.2587	0
12	41	109.494	18.2587	0
12	42	109.494	18.2587	0
12	43	109.494	18.2587	0
12	44	109.494	18.2587	0
12	45	109.494	18.2587	0
12	46	109.494	18.2587	0
12	47	109.494	18.2587	0
12	48	109.495	18.2594	0
12	49	109.496	18.2602	0
12	50	109.496	18.2603	0
12	51	109.498	18.2616	0
12	52	109.501	18.2603	1
12	53	109.502	18.2575	1
12	54	109.501	18.2563	1
12	55	109.499	18.2573	1
12	56	109.499	18.2596	1
12	57	109.499	18.2616	1
12	58	109.5	18.2617	1
12	59	109.5	18.2617	1
13	0	109.527	18.2271	0
13	1	109.527	18.2271	0
13	2	109.527	18.2271	0
13	3	109.527	18.2271	0
13	4	109.527	18.2271	0
13	5	109.527	18.2271	0
13	6	109.527	18.2271	0
13	7	109.527	18.2271	0
13	8	109.527	18.2271	0
13	9	109.527	18.2271	0
13	10	109.527	18.2271	0
13	11	109.527	18.2271	0
13	12	109.527	18.2271	0
13	13	109.527	18.227	0
13	14	109.524	18.2254	0
13	15	109.519	18.2262	0
13	16	109.516	18.2276	0
13	17	109.515	18.2266	0
13	18	109.512	18.2242	0
13	19	109.509	18.2226	0
13	20	109.509	18.2231	0
13	21	109.509	18.2231	0
13	22	109.509	18.2231	0
13	23	109.509	18.2231	0
13	24	109.509	18.2231	0
13	25	109.509	18.2231	0
13	26	109.509	18.2231	0
13	27	109.509	18.2231	0
13	28	109.509	18.2231	0
13	29	109.509	18.2231	0
13	30	109.509	18.2231	0
13	31	109.509	18.2231	0
13	32	109.509	18.2231	0
13	33	109.509	18.2231	0
13	34	109.509	18.2231	0
13	35	109.509	18.2231	0
13	36	109.509	18.2231	0
13	37	109.509	18.2231	0
13	38	109.509	18.2231	0
13	39	109.509	18.2231	0
13	40	109.509	18.2231	0
13	41	109.509	18.2231	0
13	42	109.509	18.223	0
13	43	109.509	18.223	0
13	44	109.509	18.223	0
13	45	109.509	18.223	0
13	46	109.509	18.223	0
13	47	109.509	18.223	0
13	48	109.509	18.223	0
13	49	109.509	18.223	0
13	50	109.509	18.223	0
13	51	109.509	18.223	0
13	52	109.509	18.223	0
13	53	109.509	18.223	0
13	54	109.509	18.223	0
13	55	109.509	18.223	0
13	56	109.509	18.223	0
13	57	109.509	18.223	0
13	58	109.509	18.223	0
13	59	109.509	18.223	0
14	0	109.623	18.2283	0
14	1	109.623	18.2283	0
14	2	109.623	18.2283	0
14	3	109.623	18.2283	0
14	4	109.623	18.2283	0
14	5	109.623	18.2283	0
14	6	109.623	18.2283	0
14	7	109.623	18.2283	0
14	8	109.623	18.2283	0
14	9	109.623	18.2283	0
14	10	109.623	18.2283	0
14	11	109.623	18.2283	0
14	12	109.623	18.2283	0
14	13	109.624	18.2286	0
14	14	109.624	18.2289	0
14	15	109.623	18.2283	0
14	16	109.623	18.2283	0
14	17	109.623	18.2283	0
14	18	109.623	18.2283	0
14	19	109.623	18.2283	0
14	20	109.623	18.2283	0
14	21	109.623	18.2283	0
14	22	109.623	18.2283	0
14	23	109.623	18.2283	0
14	24	109.623	18.2283	0
14	25	109.623	18.2283	0
14	26	109.623	18.2283	0
14	27	109.623	18.2283	0
14	28	109.623	18.2283	0
14	29	109.623	18.2283	0
14	30	109.623	18.2283	0
14	31	109.623	18.2283	0
14	32	109.623	18.2283	0
14	33	109.623	18.2283	0
14	34	109.623	18.2283	0
14	35	109.623	18.2283	0
14	36	109.623	18.2283	0
14	37	109.623	18.2283	0
14	38	109.623	18.2283	0
14	39	109.623	18.2283	0
14	40	109.623	18.2283	0
14	41	109.623	18.2283	0
14	42	109.623	18.2283	0
14	43	109.623	18.2283	0
14	44	109.623	18.2283	0
14	45	109.623	18.2283	0
14	46	109.623	18.2283	0
14	47	109.623	18.2283	0
14	48	109.623	18.2283	0
14	49	109.623	18.2283	0
14	50	109.623	18.2283	0
14	51	109.623	18.2283	0
14	52	109.623	18.2283	0
14	53	109.624	18.2278	0
14	54	109.625	18.228	0
14	55	109.624	18.2281	0
14	56	109.624	18.2281	0
14	57	109.624	18.2281	0
14	58	109.624	18.2281	0
14	59	109.624	18.2281	0
15	0	109.438	18.3023	0
15	1	109.438	18.3023	0
15	2	109.438	18.3023	0
15	3	109.438	18.3023	0
15	4	109.438	18.3023	0
15	5	109.438	18.3023	0
15	6	109.438	18.3023	0
15	7	109.438	18.3023	0
15	8	109.438	18.3023	0
15	9	109.438	18.3023	0
15	10	109.438	18.3023	0
15	11	109.438	18.3023	0
15	12	109.438	18.3023	0
15	13	109.438	18.3023	0
15	14	109.438	18.3023	0
15	15	109.438	18.3023	0
15	16	109.438	18.3023	0
15	17	109.438	18.3041	0
15	18	109.437	18.3053	0
15	19	109.432	18.308	0
15	20	109.424	18.3088	0
15	21	109.418	18.3106	0
15	22	109.415	18.3105	0
15	23	109.408	18.3106	0
15	24	109.406	18.3097	0
15	25	109.407	18.3094	0
15	26	109.407	18.3093	0
15	27	109.407	18.3091	0
15	28	109.407	18.3093	0
15	29	109.407	18.3094	0
15	30	109.407	18.3093	0
15	31	109.407	18.309	0
15	32	109.407	18.309	0
15	33	109.407	18.3091	0
15	34	109.407	18.3092	0
15	35	109.407	18.3091	0
15	36	109.408	18.309	0
15	37	109.407	18.3089	0
15	38	109.407	18.309	0
15	39	109.407	18.309	0
15	40	109.407	18.3091	0
15	41	109.407	18.3092	0
15	42	109.407	18.3091	0
15	43	109.407	18.3091	0
15	44	109.407	18.3094	0
15	45	109.407	18.3095	0
15	46	109.407	18.3093	0
15	47	109.407	18.3093	0
15	48	109.407	18.3092	0
15	49	109.407	18.3091	0
15	50	109.407	18.3093	0
15	51	109.407	18.3097	0
15	52	109.407	18.3094	0
15	53	109.408	18.3094	0
15	54	109.408	18.3101	0
15	55	109.408	18.3097	0
15	56	109.408	18.3095	0
15	57	109.408	18.3094	0
15	58	109.408	18.3096	0
15	59	109.408	18.3097	0
16	0	109.474	18.2761	0
16	1	109.484	18.2691	0
16	2	109.484	18.2691	0
16	3	109.484	18.2691	0
16	4	109.483	18.2686	0
16	5	109.48	18.2705	0
16	6	109.477	18.2733	0
16	7	109.47	18.2774	0
16	8	109.462	18.2814	0
16	9	109.455	18.2837	0
16	10	109.454	18.2844	0
16	11	109.454	18.2844	0
16	12	109.452	18.2851	0
16	13	109.45	18.2856	0
16	14	109.45	18.2858	0
16	15	109.445	18.287	0
16	16	109.438	18.2883	0
16	17	109.436	18.2912	0
16	18	109.437	18.2957	0
16	19	109.439	18.2987	1
16	20	109.438	18.301	1
16	21	109.438	18.302	1
16	22	109.438	18.3044	1
16	23	109.443	18.3072	1
16	24	109.443	18.3106	1
16	25	109.443	18.3095	1
16	26	109.439	18.3054	0
16	27	109.434	18.3075	0
16	28	109.427	18.3084	0
16	29	109.42	18.3101	0
16	30	109.411	18.3105	0
16	31	109.406	18.3098	0
16	32	109.407	18.3093	0
16	33	109.407	18.3093	0
16	34	109.407	18.3092	0
16	35	109.407	18.3092	0
16	36	109.407	18.3092	0
16	37	109.407	18.3092	0
16	38	109.407	18.3092	0
16	39	109.407	18.3092	0
16	40	109.407	18.309	0
16	41	109.407	18.3089	0
16	42	109.407	18.3092	0
16	43	109.407	18.3092	0
16	44	109.407	18.3092	0
16	45	109.407	18.3092	0
16	46	109.407	18.3093	0
16	47	109.407	18.3094	0
16	48	109.407	18.3094	0
16	49	109.407	18.3093	0
16	50	109.407	18.3092	0
16	51	109.407	18.3092	0
16	52	109.407	18.3092	0
16	53	109.407	18.3092	0
16	54	109.407	18.3092	0
16	55	109.408	18.3093	0
16	56	109.408	18.3093	0
16	57	109.407	18.3095	0
16	58	109.408	18.3096	0
16	59	109.408	18.3095	0
17	0	109.494	18.2741	1
17	1	109.495	18.2728	1
17	2	109.499	18.2696	1
17	3	109.499	18.269	1
17	4	109.502	18.2654	1
17	5	109.506	18.261	1
17	6	109.507	18.2556	1
17	7	109.507	18.2542	1
17	8	109.507	18.2497	1
17	9	109.508	18.2469	1
17	10	109.51	18.2467	1
17	11	109.511	18.2466	1
17	12	109.512	18.2468	1
17	13	109.512	18.2508	1
17	14	109.514	18.2547	1
17	15	109.519	18.2554	1
17	16	109.525	18.2538	1
17	17	109.531	18.2526	1
17	18	109.531	18.2526	1
17	19	109.542	18.238	1
17	20	109.543	18.2371	1
17	21	109.55	18.2398	1
17	22	109.555	18.2428	1
17	23	109.557	18.2439	1
17	24	109.558	18.2429	1
17	25	109.559	18.2427	1
17	26	109.558	18.2429	0
17	27	109.558	18.244	0
17	28	109.556	18.2436	0
17	29	109.552	18.2415	0
17	30	109.55	18.2404	0
17	31	109.55	18.2401	0
17	32	109.546	18.2376	0
17	33	109.541	18.2363	0
17	34	109.535	18.2334	0
17	35	109.531	18.2304	0
17	36	109.528	18.2278	0
17	37	109.525	18.2255	0
17	38	109.523	18.2254	0
17	39	109.523	18.2254	0
17	40	109.52	18.226	0
17	41	109.516	18.2293	0
17	42	109.514	18.2338	0
17	43	109.511	18.2353	0
17	44	109.508	18.2363	0
17	45	109.506	18.2373	0
17	46	109.504	18.2386	0
17	47	109.503	18.2398	0
17	48	109.502	18.2421	0
17	49	109.499	18.2429	0
17	50	109.498	18.2463	0
17	51	109.498	18.2479	0
17	52	109.497	18.2478	0
17	53	109.497	18.2478	0
17	54	109.498	18.2479	0
17	55	109.498	18.2498	0
17	56	109.498	18.2515	0
17	57	109.498	18.2518	0
17	58	109.499	18.2525	0
17	59	109.5	18.2541	1
18	0	109.446	18.2891	0
18	1	109.446	18.2891	0
18	2	109.446	18.2891	0
18	3	109.446	18.2891	0
18	4	109.446	18.2891	0
18	5	109.446	18.2891	0
18	6	109.446	18.2891	0
18	7	109.446	18.2891	0
18	8	109.446	18.2891	0
18	9	109.446	18.2891	0
18	10	109.446	18.2891	0
18	11	109.446	18.2891	0
18	12	109.446	18.2891	0
18	13	109.446	18.2891	0
18	14	109.446	18.2891	0
18	15	109.446	18.2891	0
18	16	109.446	18.2891	0
18	17	109.446	18.2891	0
18	18	109.446	18.2891	0
18	19	109.446	18.2891	0
18	20	109.446	18.2891	0
18	21	109.446	18.2891	0
18	22	109.446	18.2891	0
18	23	109.446	18.2891	0
18	24	109.446	18.2891	0
18	25	109.446	18.2891	0
18	26	109.446	18.2891	0
18	27	109.446	18.2891	0
18	28	109.446	18.2891	0
18	29	109.446	18.2891	0
18	30	109.446	18.2891	0
18	31	109.446	18.2891	0
18	32	109.446	18.2891	0
18	33	109.446	18.2891	0
18	34	109.446	18.2891	0
18	35	109.446	18.2891	0
18	36	109.446	18.2891	0
18	37	109.446	18.2891	0
18	38	109.446	18.2891	0
18	39	109.446	18.2891	0
18	40	109.446	18.2891	0
18	41	109.446	18.2891	0
18	42	109.446	18.2891	0
18	43	109.446	18.2891	0
18	44	109.446	18.2891	0
18	45	109.446	18.2891	0
18	46	109.446	18.2891	0
18	47	109.446	18.2891	0
18	48	109.446	18.2891	0
18	49	109.446	18.2891	0
18	50	109.446	18.2891	0
18	51	109.446	18.2891	0
18	52	109.446	18.2891	0
18	53	109.446	18.2891	0
18	54	109.446	18.2891	0
18	55	109.446	18.2891	0
18	56	109.446	18.2891	0
18	57	109.446	18.2891	0
18	58	109.446	18.2891	0
18	59	109.446	18.2891	0
19	0	109.714	18.2935	0
19	1	109.714	18.2935	0
19	2	109.714	18.2935	0
19	3	109.714	18.2935	0
19	4	109.714	18.2935	0
19	5	109.714	18.2935	0
19	6	109.714	18.2935	0
19	7	109.714	18.2935	0
19	8	109.714	18.2935	0
19	9	109.714	18.2935	0
19	10	109.714	18.2936	0
19	11	109.71	18.2945	0
19	12	109.709	18.294	0
19	13	109.711	18.2918	0
19	14	109.711	18.2911	0
19	15	109.711	18.291	0
19	16	109.711	18.291	0
19	17	109.711	18.2917	0
19	18	109.711	18.2919	0
19	19	109.711	18.2915	0
19	20	109.711	18.291	0
19	21	109.711	18.2919	0
19	22	109.711	18.2916	1
19	23	109.711	18.2925	1
19	24	109.709	18.2939	1
19	25	109.705	18.2952	1
19	26	109.703	18.2957	1
19	27	109.696	18.2988	1
19	28	109.69	18.3058	1
19	29	109.693	18.3153	1
19	30	109.691	18.3255	1
19	31	109.687	18.3314	1
19	32	109.681	18.3262	1
19	33	109.669	18.3224	1
19	34	109.663	18.3242	1
19	35	109.65	18.3305	1
19	36	109.637	18.3283	1
19	37	109.627	18.3244	1
19	38	109.621	18.32	1
19	39	109.615	18.3137	1
19	40	109.606	18.3077	1
19	41	109.602	18.3029	1
19	42	109.601	18.3026	1
19	43	109.603	18.2971	1
19	44	109.605	18.2848	1
19	45	109.607	18.277	1
19	46	109.609	18.2698	1
19	47	109.611	18.2615	1
19	48	109.617	18.2544	1
19	49	109.621	18.248	1
19	50	109.626	18.2466	1
19	51	109.634	18.2431	1
19	52	109.639	18.2379	1
19	53	109.636	18.2338	1
19	54	109.636	18.2335	1
19	55	109.636	18.2335	1
19	56	109.635	18.2328	0
19	57	109.631	18.2313	0
19	58	109.631	18.2311	0
19	59	109.632	18.2315	0
20	0	109.499	18.2594	0
20	1	109.499	18.2594	0
20	2	109.499	18.2594	0
20	3	109.499	18.2594	0
20	4	109.499	18.2594	0
20	5	109.499	18.2594	0
20	6	109.499	18.2594	0
20	7	109.499	18.2594	0
20	8	109.499	18.2594	0
20	9	109.499	18.2594	0
20	10	109.499	18.2594	0
20	11	109.499	18.2594	0
20	12	109.499	18.2594	0
20	13	109.499	18.2594	0
20	14	109.499	18.2594	0
20	15	109.499	18.2594	0
20	16	109.499	18.2595	0
20	17	109.499	18.2596	0
20	18	109.499	18.2596	0
20	19	109.499	18.2596	0
20	20	109.499	18.2597	0
20	21	109.499	18.2607	0
20	22	109.499	18.2619	0
20	23	109.5	18.2619	0
20	24	109.5	18.2619	0
20	25	109.5	18.2617	0
20	26	109.502	18.2578	0
20	27	109.503	18.2563	1
20	28	109.504	18.255	1
20	29	109.504	18.2539	1
20	30	109.504	18.2538	1
20	31	109.507	18.2539	1
20	32	109.511	18.2545	1
20	33	109.514	18.255	1
20	34	109.517	18.253	1
20	35	109.516	18.2463	1
20	36	109.517	18.249	1
20	37	109.517	18.2536	1
20	38	109.517	18.254	1
20	39	109.517	18.2551	1
20	40	109.517	18.2552	1
20	41	109.513	18.2549	1
20	42	109.511	18.2545	1
20	43	109.51	18.254	1
20	44	109.509	18.2524	1
20	45	109.509	18.2524	1
20	46	109.509	18.2538	0
20	47	109.511	18.2545	0
20	48	109.516	18.2547	0
20	49	109.517	18.2535	0
20	50	109.517	18.2535	0
20	51	109.517	18.2535	0
20	52	109.517	18.2526	0
20	53	109.516	18.247	0
20	54	109.516	18.2436	0
20	55	109.516	18.2371	0
20	56	109.516	18.2341	0
20	57	109.516	18.2352	1
20	58	109.516	18.24	1
20	59	109.516	18.247	1
21	0	109.506	18.2605	1
21	1	109.503	18.2643	1
21	2	109.501	18.2671	1
21	3	109.5	18.2679	1
21	4	109.5	18.2682	1
21	5	109.498	18.2677	1
21	6	109.495	18.2662	1
21	7	109.492	18.2688	1
21	8	109.491	18.2697	1
21	9	109.49	18.2701	1
21	10	109.49	18.2704	1
21	11	109.49	18.2706	1
21	12	109.49	18.2707	1
21	13	109.49	18.2708	1
21	14	109.489	18.271	1
21	15	109.489	18.2711	1
21	16	109.489	18.2716	1
21	17	109.488	18.2719	1
21	18	109.488	18.2721	1
21	19	109.488	18.2723	1
21	20	109.488	18.2725	1
21	21	109.488	18.2734	1
21	22	109.49	18.2757	1
21	23	109.492	18.2791	1
21	24	109.492	18.2796	1
21	25	109.49	18.2829	1
21	26	109.489	18.2841	1
21	27	109.485	18.2883	1
21	28	109.485	18.2892	1
21	29	109.484	18.2939	1
21	30	109.487	18.2962	1
21	31	109.489	18.2973	1
21	32	109.488	18.2969	0
21	33	109.492	18.2962	0
21	34	109.495	18.2944	0
21	35	109.495	18.2907	0
21	36	109.494	18.2894	0
21	37	109.493	18.2897	0
21	38	109.493	18.2897	0
21	39	109.493	18.2896	0
21	40	109.489	18.2893	0
21	41	109.488	18.2891	0
21	42	109.49	18.2885	0
21	43	109.491	18.2877	0
21	44	109.491	18.2851	0
21	45	109.49	18.2832	0
21	46	109.492	18.2802	0
21	47	109.493	18.2778	0
21	48	109.496	18.2723	0
21	49	109.499	18.2691	0
21	50	109.497	18.2665	0
21	51	109.496	18.2659	0
21	52	109.496	18.2658	0
21	53	109.496	18.2644	0
21	54	109.499	18.262	0
21	55	109.501	18.2593	0
21	56	109.502	18.2573	0
21	57	109.502	18.2578	0
21	58	109.502	18.258	0
21	59	109.502	18.258	0
22	0	109.496	18.3068	1
22	1	109.496	18.3068	1
22	2	109.496	18.3068	1
22	3	109.496	18.3068	1
22	4	109.497	18.3069	1
22	5	109.497	18.3069	1
22	6	109.497	18.3069	1
22	7	109.497	18.3069	1
22	8	109.497	18.3069	1
22	9	109.497	18.3069	1
22	10	109.497	18.3069	1
22	11	109.497	18.3069	1
22	12	109.497	18.3069	1
22	13	109.497	18.3068	1
22	14	109.497	18.3068	1
22	15	109.497	18.3068	1
22	16	109.497	18.3068	1
22	17	109.497	18.3068	1
22	18	109.497	18.3068	1
22	19	109.497	18.3068	1
22	20	109.497	18.3068	1
22	21	109.497	18.3069	1
22	22	109.497	18.3069	1
22	23	109.497	18.3069	1
22	24	109.497	18.3069	1
22	25	109.497	18.3069	1
22	26	109.497	18.3069	1
22	27	109.497	18.3069	1
22	28	109.497	18.3069	1
22	29	109.497	18.3069	1
22	30	109.497	18.3069	1
22	31	109.497	18.3069	1
22	32	109.497	18.3069	1
22	33	109.497	18.307	1
22	34	109.497	18.307	1
22	35	109.497	18.307	1
22	36	109.497	18.307	1
22	37	109.497	18.307	1
22	38	109.497	18.307	1
22	39	109.497	18.307	1
22	40	109.497	18.307	1
22	41	109.497	18.307	1
22	42	109.497	18.307	1
22	43	109.497	18.307	1
22	44	109.497	18.307	1
22	45	109.497	18.307	1
22	46	109.497	18.307	1
22	47	109.497	18.307	1
22	48	109.497	18.307	1
22	49	109.497	18.307	1
22	50	109.497	18.307	1
22	51	109.497	18.3069	1
22	52	109.496	18.3069	1
22	53	109.496	18.3068	1
22	54	109.496	18.3068	1
22	55	109.497	18.3069	1
22	56	109.497	18.3068	1
22	57	109.497	18.307	1
22	58	109.497	18.3071	1
22	59	109.497	18.3071	1
23	0	109.503	18.2626	1
23	1	109.503	18.2626	1
23	2	109.503	18.2626	1
23	3	109.503	18.2626	1
23	4	109.503	18.2626	1
23	5	109.503	18.2626	1
23	6	109.503	18.2626	1
23	7	109.503	18.2626	1
23	8	109.503	18.2626	1
23	9	109.503	18.2626	1
23	10	109.503	18.2626	1
23	11	109.503	18.2626	1
23	12	109.503	18.2626	1
23	13	109.503	18.2626	1
23	14	109.503	18.2626	1
23	15	109.503	18.2626	1
23	16	109.503	18.2626	1
23	17	109.503	18.2626	1
23	18	109.503	18.2626	1
23	19	109.503	18.2626	1
23	20	109.503	18.2626	1
23	21	109.503	18.2626	1
23	22	109.503	18.2626	1
23	23	109.503	18.2626	1
23	24	109.503	18.2626	1
23	25	109.503	18.2626	1
23	26	109.503	18.2626	1
23	27	109.503	18.2626	1
23	28	109.503	18.2626	1
23	29	109.503	18.2626	1
23	30	109.503	18.2626	1
23	31	109.503	18.2626	1
23	32	109.503	18.2626	1
23	33	109.503	18.2626	1
23	34	109.503	18.2626	1
23	35	109.503	18.2626	1
23	36	109.503	18.2626	1
23	37	109.503	18.2626	1
23	38	109.503	18.2626	1
23	39	109.503	18.2626	1
23	40	109.503	18.2626	1
23	41	109.503	18.2626	1
23	42	109.504	18.2628	1
23	43	109.504	18.2623	1
23	44	109.506	18.2615	1
23	45	109.506	18.2625	1
23	46	109.506	18.2619	1
23	47	109.506	18.2616	1
23	48	109.506	18.2613	1
23	49	109.506	18.2613	1
23	50	109.506	18.2606	1
23	51	109.506	18.2553	1
23	52	109.503	18.2553	1
23	53	109.502	18.2578	1
23	54	109.503	18.2579	1
23	55	109.503	18.2579	1
23	56	109.503	18.2579	1
23	57	109.503	18.2579	1
23	58	109.503	18.2579	1
23	59	109.503	18.2579	1
24	0	109.629	18.2369	0
24	1	109.629	18.2369	0
24	2	109.629	18.2369	0
24	3	109.629	18.2369	0
24	4	109.629	18.2369	0
24	5	109.629	18.2369	0
24	6	109.629	18.2369	0
24	7	109.629	18.2369	0
24	8	109.629	18.2369	0
24	9	109.629	18.2369	0
24	10	109.629	18.2369	0
24	11	109.629	18.2369	0
24	12	109.629	18.2369	0
24	13	109.629	18.2369	0
24	14	109.629	18.2369	0
24	15	109.629	18.2369	0
24	16	109.629	18.2369	0
24	17	109.629	18.2369	0
24	18	109.629	18.2369	0
24	19	109.629	18.2369	0
24	20	109.629	18.2369	0
24	21	109.629	18.2369	0
24	22	109.629	18.2369	0
24	23	109.629	18.2369	0
24	24	109.629	18.2369	0
24	25	109.629	18.2369	0
24	26	109.629	18.2369	0
24	27	109.629	18.2369	0
24	28	109.629	18.2368	0
24	29	109.629	18.2368	0
24	30	109.629	18.2369	0
24	31	109.629	18.2368	0
24	32	109.629	18.2368	0
24	33	109.629	18.2368	0
24	34	109.629	18.2368	0
24	35	109.629	18.2368	0
24	36	109.629	18.2368	0
24	37	109.629	18.2368	0
24	38	109.629	18.2368	0
24	39	109.629	18.2368	0
24	40	109.629	18.2368	0
24	41	109.629	18.2368	0
24	42	109.629	18.2368	0
24	43	109.629	18.2368	0
24	44	109.629	18.2368	0
24	45	109.629	18.2368	0
24	46	109.629	18.2368	0
24	47	109.629	18.2368	0
24	48	109.629	18.2368	0
24	49	109.629	18.2368	0
24	50	109.629	18.2368	0
24	51	109.629	18.2368	0
24	52	109.629	18.2368	0
24	53	109.629	18.2368	0
24	54	109.629	18.2368	0
24	55	109.629	18.2368	0
24	56	109.629	18.2368	0
24	57	109.629	18.2368	0
24	58	109.629	18.2368	0
24	59	109.629	18.2368	0
25	0	109.397	18.2905	1
25	1	109.391	18.2903	1
25	2	109.383	18.2899	1
25	3	109.376	18.2896	1
25	4	109.371	18.2904	1
25	5	109.372	18.2939	1
25	6	109.374	18.2964	1
25	7	109.374	18.2967	1
25	8	109.369	18.2965	1
25	9	109.364	18.295	1
25	10	109.363	18.2941	1
25	11	109.363	18.2941	1
25	12	109.363	18.2941	1
25	13	109.363	18.2941	1
25	14	109.363	18.2941	1
25	15	109.363	18.2941	1
25	16	109.363	18.2941	1
25	17	109.363	18.2941	1
25	18	109.363	18.2941	1
25	19	109.363	18.2941	1
25	20	109.363	18.2941	1
25	21	109.363	18.2941	1
25	22	109.363	18.2941	1
25	23	109.363	18.2941	1
25	24	109.363	18.2941	1
25	25	109.363	18.2941	1
25	26	109.363	18.2941	1
25	27	109.363	18.2941	1
25	28	109.363	18.2941	1
25	29	109.363	18.2941	1
25	30	109.363	18.2941	1
25	31	109.364	18.2941	1
25	32	109.364	18.2942	1
25	33	109.364	18.2942	1
25	34	109.364	18.2942	1
25	35	109.364	18.2942	1
25	36	109.364	18.2942	1
25	37	109.364	18.2942	1
25	38	109.364	18.2942	1
25	39	109.364	18.2942	1
25	40	109.364	18.2942	1
25	41	109.364	18.2942	1
25	42	109.364	18.2942	1
25	43	109.364	18.2942	1
25	44	109.364	18.2942	1
25	45	109.364	18.2942	1
25	46	109.364	18.2942	1
25	47	109.364	18.2942	1
25	48	109.364	18.2942	1
25	49	109.364	18.2942	1
25	50	109.364	18.2942	1
25	51	109.364	18.2942	1
25	52	109.364	18.2942	1
25	53	109.364	18.2942	1
25	54	109.364	18.2942	1
25	55	109.364	18.2942	1
25	56	109.364	18.2942	1
25	57	109.364	18.2942	1
25	58	109.364	18.2942	1
25	59	109.364	18.2942	1
26	0	109.516	18.2712	1
26	1	109.515	18.2703	1
26	2	109.511	18.2646	1
26	3	109.508	18.2625	1
26	4	109.507	18.2583	1
26	5	109.507	18.2551	1
26	6	109.507	18.2543	1
26	7	109.507	18.2536	1
26	8	109.507	18.2522	1
26	9	109.507	18.2522	1
26	10	109.507	18.2511	1
26	11	109.508	18.2456	0
26	12	109.509	18.2387	0
26	13	109.505	18.2376	0
26	14	109.503	18.2379	0
26	15	109.502	18.2366	0
26	16	109.502	18.2378	1
26	17	109.501	18.2405	1
26	18	109.5	18.2439	1
26	19	109.499	18.2482	1
26	20	109.498	18.2515	1
26	21	109.498	18.2528	1
26	22	109.497	18.2537	1
26	23	109.496	18.2562	1
26	24	109.496	18.2595	1
26	25	109.494	18.2628	1
26	26	109.493	18.2632	1
26	27	109.49	18.2618	1
26	28	109.489	18.2626	1
26	29	109.491	18.2609	0
26	30	109.492	18.2586	0
26	31	109.495	18.2555	0
26	32	109.497	18.2502	0
26	33	109.499	18.248	0
26	34	109.499	18.246	0
26	35	109.5	18.2432	0
26	36	109.501	18.2407	0
26	37	109.501	18.2402	0
26	38	109.5	18.2428	0
26	39	109.499	18.246	0
26	40	109.499	18.2491	0
26	41	109.498	18.2515	0
26	42	109.5	18.2526	0
26	43	109.5	18.2536	0
26	44	109.5	18.2542	0
26	45	109.5	18.2542	0
26	46	109.5	18.2542	0
26	47	109.5	18.2542	0
26	48	109.5	18.2542	0
26	49	109.5	18.2542	0
26	50	109.5	18.2542	0
26	51	109.5	18.2543	0
26	52	109.5	18.2553	0
26	53	109.5	18.256	0
26	54	109.502	18.2568	0
26	55	109.502	18.2578	0
26	56	109.502	18.2573	0
26	57	109.502	18.2578	0
26	58	109.503	18.258	0
26	59	109.503	18.258	0
27	0	109.526	18.2906	1
27	1	109.532	18.2931	1
27	2	109.539	18.2935	1
27	3	109.548	18.2906	1
27	4	109.557	18.2868	1
27	5	109.565	18.2845	1
27	6	109.571	18.2828	1
27	7	109.575	18.2819	1
27	8	109.58	18.282	1
27	9	109.58	18.2821	1
27	10	109.581	18.2822	1
27	11	109.581	18.2823	1
27	12	109.581	18.2823	1
27	13	109.585	18.2833	1
27	14	109.592	18.2835	1
27	15	109.598	18.2811	1
27	16	109.605	18.2777	1
27	17	109.609	18.2721	1
27	18	109.61	18.264	1
27	19	109.615	18.2569	1
27	20	109.62	18.2503	1
27	21	109.622	18.2468	1
27	22	109.625	18.2468	1
27	23	109.632	18.2447	0
27	24	109.638	18.2391	0
27	25	109.641	18.2342	0
27	26	109.64	18.2371	0
27	27	109.639	18.2391	0
27	28	109.635	18.2424	0
27	29	109.628	18.2464	0
27	30	109.621	18.2482	0
27	31	109.619	18.254	0
27	32	109.616	18.2608	0
27	33	109.612	18.2664	0
27	34	109.609	18.273	0
27	35	109.607	18.2772	0
27	36	109.605	18.2848	0
27	37	109.604	18.2971	0
27	38	109.602	18.3023	0
27	39	109.601	18.3015	0
27	40	109.595	18.2945	0
27	41	109.588	18.2881	0
27	42	109.584	18.2848	0
27	43	109.582	18.283	0
27	44	109.579	18.2804	0
27	45	109.574	18.2774	1
27	46	109.571	18.2738	1
27	47	109.569	18.2695	1
27	48	109.565	18.2609	1
27	49	109.561	18.2498	1
27	50	109.558	18.2447	1
27	51	109.555	18.243	1
27	52	109.549	18.239	1
27	53	109.543	18.237	1
27	54	109.537	18.2346	1
27	55	109.531	18.2302	1
27	56	109.526	18.2262	1
27	57	109.521	18.2259	1
27	58	109.515	18.2302	1
27	59	109.513	18.2342	1
28	0	109.434	18.3004	1
28	1	109.438	18.3024	1
28	2	109.437	18.3049	1
28	3	109.436	18.3062	1
28	4	109.43	18.3081	1
28	5	109.423	18.309	1
28	6	109.418	18.3107	1
28	7	109.415	18.3105	1
28	8	109.408	18.3105	1
28	9	109.407	18.3093	1
28	10	109.408	18.3095	1
28	11	109.41	18.3098	0
28	12	109.416	18.3105	0
28	13	109.416	18.3106	0
28	14	109.41	18.3105	0
28	15	109.406	18.3099	0
28	16	109.407	18.3094	0
28	17	109.407	18.3095	0
28	18	109.407	18.3096	0
28	19	109.407	18.3094	0
28	20	109.407	18.309	0
28	21	109.407	18.3091	0
28	22	109.407	18.3091	0
28	23	109.408	18.3088	0
28	24	109.407	18.3088	0
28	25	109.407	18.3082	0
28	26	109.405	18.3042	0
28	27	109.405	18.3035	0
28	28	109.404	18.3014	0
28	29	109.404	18.3016	0
28	30	109.407	18.3079	0
28	31	109.41	18.315	0
28	32	109.415	18.3229	0
28	33	109.416	18.326	0
28	34	109.416	18.326	0
28	35	109.416	18.326	0
28	36	109.416	18.326	0
28	37	109.416	18.326	0
28	38	109.415	18.3233	0
28	39	109.408	18.3091	0
28	40	109.408	18.3091	0
28	41	109.408	18.3091	0
28	42	109.408	18.3091	0
28	43	109.408	18.3091	0
28	44	109.408	18.3088	0
28	45	109.408	18.309	0
28	46	109.408	18.3092	0
28	47	109.408	18.3092	0
28	48	109.408	18.3092	0
28	49	109.408	18.3092	0
28	50	109.408	18.3094	0
28	51	109.408	18.3094	0
28	52	109.408	18.3094	0
28	53	109.408	18.3094	0
28	54	109.408	18.3092	0
28	55	109.408	18.3093	0
28	56	109.408	18.3094	0
28	57	109.408	18.3094	0
28	58	109.408	18.3097	0
28	59	109.408	18.3095	0
29	0	109.48	18.2978	0
29	1	109.48	18.2978	0
29	2	109.48	18.2978	0
29	3	109.48	18.2978	0
29	4	109.48	18.2978	0
29	5	109.48	18.2978	0
29	6	109.48	18.2978	0
29	7	109.48	18.2978	0
29	8	109.48	18.2978	0
29	9	109.48	18.2978	0
29	10	109.48	18.2978	0
29	11	109.48	18.2978	0
29	12	109.48	18.2978	0
29	13	109.48	18.2978	0
29	14	109.48	18.2978	0
29	15	109.48	18.2978	0
29	16	109.48	18.2978	0
29	17	109.48	18.2978	0
29	18	109.48	18.2978	0
29	19	109.48	18.2978	0
29	20	109.48	18.2978	0
29	21	109.48	18.2978	0
29	22	109.48	18.2978	0
29	23	109.48	18.2978	0
29	24	109.48	18.2978	0
29	25	109.48	18.2978	0
29	26	109.48	18.2978	0
29	27	109.48	18.2978	0
29	28	109.48	18.2978	0
29	29	109.48	18.2978	0
29	30	109.48	18.2978	0
29	31	109.48	18.2978	0
29	32	109.48	18.2978	0
29	33	109.48	18.2978	0
29	34	109.48	18.2978	0
29	35	109.48	18.2978	0
29	36	109.48	18.2978	0
29	37	109.48	18.2978	0
29	38	109.48	18.2978	0
29	39	109.48	18.2978	0
29	40	109.48	18.2978	0
29	41	109.48	18.2978	0
29	42	109.48	18.2978	0
29	43	109.48	18.2978	0
29	44	109.48	18.2979	0
29	45	109.479	18.2968	0
29	46	109.479	18.2963	0
29	47	109.479	18.2941	0
29	48	109.483	18.2919	0
29	49	109.485	18.2895	0
29	50	109.491	18.2885	0
29	51	109.49	18.2843	0
29	52	109.49	18.2836	0
29	53	109.49	18.2835	0
29	54	109.492	18.2809	0
29	55	109.494	18.2765	0
29	56	109.497	18.2715	0
29	57	109.499	18.2686	0
29	58	109.496	18.2664	0
29	59	109.496	18.2658	0
30	0	109.736	18.3504	0
30	1	109.736	18.3504	0
30	2	109.736	18.3507	1
30	3	109.736	18.3546	1
30	4	109.735	18.3515	1
30	5	109.731	18.3406	1
30	6	109.728	18.3303	1
30	7	109.726	18.3204	1
30	8	109.718	18.3208	1
30	9	109.708	18.3226	1
30	10	109.703	18.3253	1
30	11	109.703	18.3256	1
30	12	109.703	18.3254	1
30	13	109.698	18.3254	1
30	14	109.688	18.3302	1
30	15	109.685	18.3295	1
30	16	109.674	18.3224	1
30	17	109.664	18.3239	1
30	18	109.657	18.3274	1
30	19	109.641	18.3293	1
30	20	109.628	18.3247	1
30	21	109.615	18.3245	1
30	22	109.609	18.3261	1
30	23	109.595	18.3222	1
30	24	109.577	18.3198	1
30	25	109.562	18.3208	1
30	26	109.547	18.3178	1
30	27	109.532	18.3159	1
30	28	109.519	18.3189	1
30	29	109.51	18.3255	1
30	30	109.5	18.3253	1
30	31	109.484	18.3242	1
30	32	109.47	18.3249	1
30	33	109.456	18.3219	1
30	34	109.445	18.3174	1
30	35	109.442	18.3155	1
30	36	109.443	18.3082	1
30	37	109.438	18.3058	1
30	38	109.432	18.3081	1
30	39	109.43	18.3082	1
30	40	109.422	18.3095	1
30	41	109.414	18.3104	1
30	42	109.407	18.3105	1
30	43	109.406	18.3093	1
30	44	109.408	18.3094	1
30	45	109.408	18.3094	0
30	46	109.411	18.3099	0
30	47	109.418	18.3102	0
30	48	109.426	18.3083	0
30	49	109.432	18.308	0
30	50	109.437	18.3044	0
30	51	109.439	18.3021	0
30	52	109.442	18.3027	0
30	53	109.442	18.3056	0
30	54	109.437	18.306	0
30	55	109.432	18.3081	0
30	56	109.428	18.3082	0
30	57	109.42	18.3099	0
30	58	109.412	18.3105	0
30	59	109.406	18.3102	0
31	0	109.487	18.2855	1
31	1	109.489	18.2834	1
31	2	109.492	18.2802	1
31	3	109.494	18.276	1
31	4	109.497	18.2715	1
31	5	109.499	18.2695	1
31	6	109.499	18.2694	1
31	7	109.501	18.2674	1
31	8	109.503	18.2639	1
31	9	109.506	18.2599	1
31	10	109.507	18.255	1
31	11	109.507	18.2513	1
31	12	109.507	18.2487	1
31	13	109.508	18.2444	1
31	14	109.509	18.2392	1
31	15	109.507	18.2369	1
31	16	109.504	18.2387	1
31	17	109.503	18.2426	1
31	18	109.503	18.2432	1
31	19	109.502	18.2441	1
31	20	109.502	18.2452	0
31	21	109.501	18.2478	0
31	22	109.501	18.2521	0
31	23	109.503	18.2535	0
31	24	109.503	18.2567	0
31	25	109.502	18.2578	0
31	26	109.502	18.2578	0
31	27	109.502	18.2578	0
31	28	109.502	18.2578	0
31	29	109.502	18.2578	0
31	30	109.502	18.2578	0
31	31	109.502	18.2578	0
31	32	109.502	18.2578	0
31	33	109.502	18.2578	0
31	34	109.502	18.2578	0
31	35	109.502	18.2578	0
31	36	109.502	18.2578	0
31	37	109.502	18.2578	0
31	38	109.502	18.2578	0
31	39	109.502	18.2578	0
31	40	109.502	18.2578	0
31	41	109.502	18.2578	0
31	42	109.502	18.2578	0
31	43	109.502	18.2578	0
31	44	109.502	18.2578	0
31	45	109.502	18.2578	0
31	46	109.502	18.2578	0
31	47	109.502	18.2578	0
31	48	109.502	18.2578	0
31	49	109.502	18.2578	0
31	50	109.502	18.2578	0
31	51	109.502	18.2578	0
31	52	109.502	18.2578	0
31	53	109.502	18.2578	0
31	54	109.502	18.2578	0
31	55	109.502	18.2578	0
31	56	109.502	18.2578	0
31	57	109.502	18.2578	0
31	58	109.502	18.2578	0
31	59	109.502	18.2578	0
32	0	109.58	18.2821	0
32	1	109.581	18.2822	0
32	2	109.581	18.2824	0
32	3	109.583	18.2835	0
32	4	109.584	18.2841	0
32	5	109.586	18.286	0
32	6	109.589	18.2889	0
32	7	109.594	18.2937	0
32	8	109.599	18.3	0
32	9	109.601	18.302	0
32	10	109.604	18.3049	0
32	11	109.611	18.3106	0
32	12	109.618	18.3153	0
32	13	109.624	18.3204	0
32	14	109.633	18.3265	0
32	15	109.642	18.3296	0
32	16	109.65	18.3303	0
32	17	109.654	18.3286	0
32	18	109.67	18.3217	0
32	19	109.682	18.3262	0
32	20	109.688	18.3294	0
32	21	109.692	18.3227	0
32	22	109.692	18.312	0
32	23	109.691	18.3029	0
32	24	109.693	18.3003	0
32	25	109.694	18.2999	0
32	26	109.695	18.301	0
32	27	109.696	18.3026	0
32	28	109.695	18.3017	0
32	29	109.696	18.3032	0
32	30	109.696	18.3034	0
32	31	109.696	18.3034	0
32	32	109.697	18.3043	0
32	33	109.697	18.3063	0
32	34	109.698	18.3102	0
32	35	109.699	18.3145	0
32	36	109.701	18.3184	0
32	37	109.702	18.3227	0
32	38	109.709	18.3222	0
32	39	109.713	18.3217	0
32	40	109.719	18.3203	0
32	41	109.726	18.3184	0
32	42	109.726	18.3224	0
32	43	109.728	18.3304	0
32	44	109.731	18.336	0
32	45	109.732	18.3435	0
32	46	109.734	18.3484	0
32	47	109.736	18.3483	0
32	48	109.734	18.3502	0
32	49	109.736	18.3551	0
32	50	109.735	18.3534	0
32	51	109.733	18.347	0
32	52	109.731	18.3404	0
32	53	109.73	18.3384	0
32	54	109.729	18.3325	0
32	55	109.726	18.3233	0
32	56	109.722	18.3195	0
32	57	109.714	18.3218	0
32	58	109.713	18.3218	0
32	59	109.707	18.3229	0
33	0	109.491	18.2877	1
33	1	109.491	18.2877	1
33	2	109.491	18.2877	1
33	3	109.491	18.2877	1
33	4	109.491	18.2877	1
33	5	109.491	18.2877	1
33	6	109.491	18.2877	1
33	7	109.491	18.2877	1
33	8	109.491	18.2877	1
33	9	109.491	18.2877	1
33	10	109.491	18.2877	1
33	11	109.491	18.2877	1
33	12	109.491	18.2877	1
33	13	109.491	18.2877	1
33	14	109.491	18.2877	1
33	15	109.491	18.2877	1
33	16	109.491	18.2877	1
33	17	109.491	18.2877	1
33	18	109.491	18.2877	1
33	19	109.491	18.2877	1
33	20	109.491	18.2877	1
33	21	109.491	18.2877	1
33	22	109.491	18.2877	1
33	23	109.491	18.2877	1
33	24	109.491	18.2877	1
33	25	109.491	18.2877	1
33	26	109.491	18.2877	1
33	27	109.491	18.2877	1
33	28	109.491	18.2877	1
33	29	109.491	18.2877	1
33	30	109.491	18.2877	1
33	31	109.491	18.2877	1
33	32	109.491	18.2877	1
33	33	109.491	18.2877	1
33	34	109.491	18.2877	1
33	35	109.491	18.2877	1
33	36	109.491	18.2877	1
33	37	109.491	18.2877	1
33	38	109.491	18.2877	1
33	39	109.491	18.2877	1
33	40	109.491	18.2877	1
33	41	109.491	18.2877	1
33	42	109.491	18.2877	1
33	43	109.491	18.2877	1
33	44	109.491	18.2877	1
33	45	109.491	18.2877	1
33	46	109.491	18.2877	1
33	47	109.491	18.2877	1
33	48	109.491	18.2877	1
33	49	109.491	18.2877	1
33	50	109.491	18.2877	1
33	51	109.491	18.2877	1
33	52	109.491	18.2877	1
33	53	109.491	18.2878	0
33	54	109.491	18.2882	0
33	55	109.491	18.2881	0
33	56	109.491	18.2881	0
33	57	109.49	18.2884	0
33	58	109.488	18.2889	0
33	59	109.488	18.2889	0
34	0	109.575	18.282	0
34	1	109.579	18.2818	0
34	2	109.58	18.282	0
34	3	109.581	18.2822	0
34	4	109.581	18.2822	0
34	5	109.582	18.2825	0
34	6	109.585	18.2834	0
34	7	109.59	18.2836	0
34	8	109.594	18.2835	0
34	9	109.594	18.2836	1
34	10	109.599	18.2809	1
34	11	109.605	18.278	1
34	12	109.607	18.2786	1
34	13	109.604	18.2878	1
34	14	109.604	18.2976	1
34	15	109.604	18.3053	1
34	16	109.611	18.3112	1
34	17	109.616	18.3143	1
34	18	109.619	18.3162	0
[truncated: 1,062 more rows]

## Sheet: Modeled
No	Time	Longitude	Latitude	Passenger
1	0	109.528	18.2974	0
1	1	109.528	18.2974	0
1	2	109.528	18.2974	0
1	3	109.528	18.2974	0
1	4	109.528	18.2974	0
1	5	109.528	18.2974	0
1	6	109.528	18.2974	0
1	7	109.528	18.2974	0
1	8	109.528	18.2974	0
1	9	109.528	18.2974	0
1	10	109.528	18.2974	0
1	11	109.528	18.2974	0
1	12	109.528	18.2974	0
1	13	109.528	18.2974	0
1	14	109.528	18.2974	0
1	15	109.528	18.2974	0
1	16	109.528	18.2974	0
1	17	109.528	18.2974	0
1	18	109.528	18.2974	0
1	19	109.528	18.2974	0
1	20	109.528	18.2974	0
1	21	109.528	18.2974	0
1	22	109.528	18.2974	0
1	23	109.528	18.2974	0
1	24	109.528	18.2974	0
1	25	109.528	18.2974	0
1	26	109.528	18.2974	0
1	27	109.528	18.2974	0
1	28	109.528	18.2974	0
1	29	109.528	18.2974	0
1	30	109.533	18.3007	1
1	31	109.529	18.3002	1
1	32	109.525	18.2992	1
1	33	109.521	18.2977	1
1	34	109.516	18.2961	1
1	35	109.512	18.2944	1
1	36	109.506	18.2919	1
1	37	109.502	18.2899	1
1	38	109.5	18.2875	1
1	39	109.5	18.2875	1
1	40	109.499	18.2868	1
1	41	109.496	18.2843	1
1	42	109.495	18.2827	1
1	43	109.496	18.2843	1
1	44	109.494	18.2817	1
1	45	109.492	18.2795	1
1	46	109.49	18.2759	1
1	47	109.488	18.2734	1
1	48	109.489	18.2715	1
1	49	109.489	18.2708	1
1	50	109.49	18.2704	1
1	51	109.492	18.2683	1
1	52	109.495	18.2659	1
1	53	109.495	18.2658	1
1	54	109.496	18.2658	1
1	55	109.498	18.2678	1
1	56	109.499	18.2684	1
1	57	109.499	18.2688	1
1	58	109.5	18.2691	1
1	59	109.503	18.2719	1
2	0	109.504	18.2855	1
2	1	109.5	18.2881	1
2	2	109.496	18.2892	1
2	3	109.491	18.2893	1
2	4	109.484	18.2911	1
2	5	109.484	18.2957	1
2	6	109.489	18.2963	1
2	7	109.489	18.2974	1
2	8	109.489	18.2974	0
2	9	109.489	18.2974	0
2	10	109.489	18.2974	0
2	11	109.489	18.2974	0
2	12	109.489	18.2974	0
2	13	109.489	18.2974	0
2	14	109.489	18.2974	0
2	15	109.489	18.2974	0
2	16	109.489	18.2974	0
2	17	109.489	18.2974	0
2	18	109.489	18.2974	0
2	19	109.489	18.2974	0
2	20	109.488	18.2974	1
2	21	109.487	18.2966	1
2	22	109.484	18.2961	1
2	23	109.484	18.292	1
2	24	109.485	18.2879	1
2	25	109.489	18.2839	1
2	26	109.49	18.283	1
2	27	109.492	18.28	1
2	28	109.492	18.2795	1
2	29	109.494	18.275	1
2	30	109.498	18.2704	1
2	31	109.498	18.2676	1
2	32	109.496	18.2658	1
2	33	109.496	18.2657	1
2	34	109.496	18.2641	1
2	35	109.498	18.2616	1
2	36	109.499	18.2578	1
2	37	109.5	18.2553	1
2	38	109.499	18.253	1
2	39	109.497	18.2531	1
2	40	109.497	18.2536	1
2	41	109.497	18.2536	0
2	42	109.497	18.2536	0
2	43	109.497	18.2536	0
2	44	109.497	18.2536	0
2	45	109.497	18.2536	0
2	46	109.497	18.2536	0
2	47	109.497	18.2536	0
2	48	109.498	18.2527	1
2	49	109.497	18.2542	1
2	50	109.497	18.255	1
2	51	109.496	18.2551	1
2	52	109.496	18.2529	1
2	53	109.498	18.2484	1
2	54	109.499	18.2456	1
2	55	109.5	18.2418	1
2	56	109.501	18.2389	1
2	57	109.502	18.237	1
2	58	109.504	18.2376	1
2	59	109.507	18.2366	1
3	0	109.502	18.2658	1
3	1	109.501	18.267	1
3	2	109.5	18.2684	1
3	3	109.502	18.2709	1
3	4	109.506	18.2746	1
3	5	109.508	18.2764	1
3	6	109.509	18.2769	1
3	7	109.506	18.2801	1
3	8	109.501	18.2854	1
3	9	109.5	18.2876	1
3	10	109.505	18.2913	1
3	11	109.511	18.2938	1
3	12	109.513	18.2949	1
3	13	109.514	18.2951	1
3	14	109.52	18.2974	1
3	15	109.524	18.2985	1
3	16	109.527	18.2996	1
3	17	109.527	18.2997	1
3	18	109.531	18.3005	1
3	19	109.536	18.2997	1
3	20	109.539	18.2986	1
3	21	109.539	18.2978	1
3	22	109.54	18.2964	1
3	23	109.542	18.2964	1
3	24	109.546	18.2988	1
3	25	109.548	18.2985	1
3	26	109.548	18.2987	1
3	27	109.548	18.2987	0
3	28	109.548	18.2987	0
3	29	109.548	18.2987	0
3	30	109.548	18.2987	0
3	31	109.548	18.2987	0
3	32	109.548	18.2987	0
3	33	109.548	18.2987	0
3	34	109.548	18.2987	0
3	35	109.548	18.2987	0
3	36	109.548	18.2987	0
3	37	109.548	18.2987	0
3	38	109.548	18.2987	0
3	39	109.548	18.2987	0
3	40	109.548	18.2987	0
3	41	109.548	18.2987	0
3	42	109.548	18.2987	0
3	43	109.548	18.2987	0
3	44	109.548	18.2987	0
3	45	109.548	18.2987	0
3	46	109.548	18.2987	0
3	47	109.548	18.2987	0
3	48	109.548	18.2987	0
3	49	109.548	18.2987	0
3	50	109.544	18.2926	1
3	51	109.548	18.2909	1
3	52	109.541	18.2934	1
3	53	109.535	18.2939	1
3	54	109.53	18.293	1
3	55	109.526	18.2911	1
3	56	109.52	18.2864	1
3	57	109.514	18.2817	1
3	58	109.513	18.2803	1
3	59	109.512	18.2801	1
4	0	109.602	18.3012	1
4	1	109.599	18.3047	1
4	2	109.594	18.3089	1
4	3	109.589	18.3117	1
4	4	109.581	18.3178	1
4	5	109.576	18.3202	1
4	6	109.564	18.3206	1
4	7	109.55	18.3188	1
4	8	109.536	18.3162	1
4	9	109.523	18.3167	1
4	10	109.513	18.3229	1
4	11	109.509	18.326	1
4	12	109.492	18.3246	1
4	13	109.479	18.3245	1
4	14	109.466	18.3248	1
4	15	109.454	18.3209	1
4	16	109.441	18.3167	1
4	17	109.43	18.3172	1
4	18	109.419	18.3172	1
4	19	109.409	18.3177	1
4	20	109.396	18.3207	1
4	21	109.383	18.3194	1
4	22	109.371	18.3133	1
4	23	109.36	18.317	1
4	24	109.351	18.3238	1
4	25	109.339	18.3208	1
4	26	109.327	18.3176	1
4	27	109.314	18.3208	1
4	28	109.3	18.3201	1
4	29	109.287	18.3152	1
4	30	109.275	18.3134	1
4	31	109.265	18.3206	1
4	32	109.253	18.3218	1
4	33	109.245	18.3204	1
4	34	109.242	18.3178	1
4	35	109.237	18.3179	1
4	36	109.236	18.319	1
4	37	109.236	18.319	1
4	38	109.236	18.319	1
4	39	109.236	18.319	1
4	40	109.236	18.319	1
4	41	109.236	18.319	1
4	42	109.236	18.319	1
4	43	109.234	18.3193	1
4	44	109.226	18.3192	1
4	45	109.217	18.3185	1
4	46	109.209	18.3188	1
4	47	109.205	18.3164	1
4	48	109.205	18.3107	1
4	49	109.205	18.308	1
4	50	109.205	18.3072	1
4	51	109.205	18.3089	1
4	52	109.205	18.3089	0
4	53	109.205	18.3089	0
4	54	109.205	18.3089	0
4	55	109.205	18.3089	0
4	56	109.205	18.3089	0
4	57	109.205	18.3089	0
4	58	109.205	18.3089	0
4	59	109.205	18.3089	0
5	0	109.575	18.2862	0
5	1	109.575	18.2862	0
5	2	109.575	18.2862	0
5	3	109.576	18.2858	1
5	4	109.576	18.2822	1
5	5	109.58	18.282	1
5	6	109.581	18.2822	1
5	7	109.581	18.2823	1
5	8	109.584	18.2832	1
5	9	109.587	18.2835	1
5	10	109.586	18.2836	1
5	11	109.584	18.2833	1
5	12	109.582	18.2828	1
5	13	109.581	18.2824	1
5	14	109.575	18.2826	1
5	15	109.576	18.2861	1
5	16	109.575	18.2862	1
5	17	109.575	18.2862	1
5	18	109.575	18.2862	1
5	19	109.575	18.2862	1
5	20	109.575	18.2862	1
5	21	109.575	18.2862	1
5	22	109.575	18.2862	1
5	23	109.575	18.2862	1
5	24	109.576	18.2858	1
5	25	109.576	18.2858	0
5	26	109.576	18.2858	0
5	27	109.576	18.2858	0
5	28	109.576	18.2858	0
5	29	109.576	18.2858	0
5	30	109.576	18.2858	0
5	31	109.576	18.2858	0
5	32	109.576	18.2858	0
5	33	109.576	18.2858	0
5	34	109.576	18.2858	0
5	35	109.576	18.2858	0
5	36	109.576	18.2858	0
5	37	109.576	18.2858	0
5	38	109.576	18.2858	0
5	39	109.576	18.2858	0
5	40	109.576	18.2858	0
5	41	109.576	18.2858	0
5	42	109.576	18.2858	0
5	43	109.576	18.286	1
5	44	109.575	18.2827	1
5	45	109.567	18.2841	1
5	46	109.557	18.2868	1
5	47	109.549	18.2906	1
5	48	109.54	18.2937	1
5	49	109.534	18.2938	1
5	50	109.529	18.2923	1
5	51	109.525	18.2898	1
5	52	109.526	18.2846	1
5	53	109.524	18.2787	1
5	54	109.523	18.2735	1
5	55	109.517	18.2716	1
5	56	109.515	18.2702	1
5	57	109.513	18.2678	1
5	58	109.508	18.2619	1
5	59	109.507	18.2555	1
6	0	109.496	18.233	0
6	1	109.496	18.233	0
6	2	109.496	18.233	0
6	3	109.496	18.233	0
6	4	109.496	18.233	0
6	5	109.496	18.233	0
6	6	109.496	18.233	0
6	7	109.496	18.233	0
6	8	109.496	18.233	0
6	9	109.496	18.233	0
6	10	109.496	18.233	0
6	11	109.496	18.233	0
6	12	109.496	18.233	0
6	13	109.496	18.233	0
6	14	109.496	18.233	0
6	15	109.496	18.233	0
6	16	109.496	18.233	0
6	17	109.496	18.233	0
6	18	109.496	18.233	0
6	19	109.496	18.233	0
6	20	109.496	18.233	0
6	21	109.496	18.233	0
6	22	109.496	18.233	0
6	23	109.496	18.233	0
6	24	109.496	18.233	0
6	25	109.496	18.233	0
6	26	109.496	18.233	0
6	27	109.496	18.233	0
6	28	109.496	18.233	0
6	29	109.496	18.233	0
6	30	109.496	18.233	0
6	31	109.496	18.233	0
6	32	109.496	18.233	0
6	33	109.496	18.233	0
6	34	109.496	18.233	0
6	35	109.496	18.233	0
6	36	109.496	18.233	0
6	37	109.496	18.233	0
6	38	109.496	18.233	0
6	39	109.496	18.233	0
6	40	109.496	18.233	0
6	41	109.496	18.233	0
6	42	109.496	18.233	0
6	43	109.496	18.233	0
6	44	109.496	18.233	0
6	45	109.496	18.233	0
6	46	109.496	18.233	0
6	47	109.496	18.233	0
6	48	109.496	18.233	0
6	49	109.503	18.2377	1
6	50	109.505	18.2373	1
6	51	109.51	18.2356	1
6	52	109.513	18.2335	1
6	53	109.515	18.2283	1
6	54	109.514	18.2257	1
6	55	109.51	18.2231	1
6	56	109.506	18.221	1
6	57	109.502	18.222	1
6	58	109.502	18.2222	1
6	59	109.502	18.2222	0
7	0	109.51	18.2707	0
7	1	109.51	18.2707	0
7	2	109.51	18.2707	0
7	3	109.51	18.2707	0
7	4	109.51	18.2707	0
7	5	109.51	18.2707	0
7	6	109.51	18.2707	0
7	7	109.51	18.2707	0
7	8	109.51	18.2707	0
7	9	109.51	18.2707	0
7	10	109.51	18.2707	0
7	11	109.51	18.2707	0
7	12	109.51	18.2707	0
7	13	109.51	18.2707	0
7	14	109.51	18.2707	0
7	15	109.51	18.2707	0
7	16	109.51	18.2707	0
7	17	109.51	18.2707	0
7	18	109.51	18.2707	0
7	19	109.51	18.2707	0
7	20	109.51	18.2707	0
7	21	109.51	18.2707	0
7	22	109.51	18.2707	0
7	23	109.51	18.2707	0
7	24	109.51	18.2707	0
7	25	109.51	18.2707	0
7	26	109.51	18.2707	0
7	27	109.51	18.2707	0
7	28	109.51	18.2707	0
7	29	109.51	18.2707	0
7	30	109.51	18.2707	0
7	31	109.51	18.2707	0
7	32	109.51	18.2707	0
7	33	109.51	18.2707	0
7	34	109.51	18.2707	0
7	35	109.51	18.2707	0
7	36	109.51	18.2707	0
7	37	109.51	18.2707	0
7	38	109.51	18.2707	0
7	39	109.51	18.2707	0
7	40	109.51	18.2707	0
7	41	109.51	18.2707	0
7	42	109.51	18.2707	0
7	43	109.51	18.2707	0
7	44	109.51	18.2707	0
7	45	109.51	18.2707	0
7	46	109.51	18.2707	0
7	47	109.51	18.2707	0
7	48	109.51	18.2707	0
7	49	109.51	18.2707	0
7	50	109.51	18.2707	0
7	51	109.51	18.2707	0
7	52	109.51	18.2707	0
7	53	109.51	18.2707	0
7	54	109.51	18.2707	0
7	55	109.51	18.2707	0
7	56	109.51	18.2707	0
7	57	109.51	18.2707	0
7	58	109.51	18.2707	0
7	59	109.51	18.2707	0
8	0	109.534	18.2993	1
8	1	109.532	18.3003	1
8	2	109.528	18.2997	1
8	3	109.522	18.2978	1
8	4	109.518	18.2964	1
8	5	109.513	18.2947	1
8	6	109.509	18.2929	1
8	7	109.502	18.2897	1
8	8	109.498	18.2884	1
8	9	109.495	18.2898	1
8	10	109.495	18.2934	1
8	11	109.496	18.2968	1
8	12	109.493	18.2968	1
8	13	109.49	18.2968	1
8	14	109.49	18.2969	1
8	15	109.49	18.2969	1
8	16	109.49	18.2969	1
8	17	109.49	18.2969	1
8	18	109.49	18.2969	1
8	19	109.49	18.2969	1
8	20	109.49	18.2969	1
8	21	109.49	18.2969	1
8	22	109.49	18.2969	0
8	23	109.49	18.2969	0
8	24	109.49	18.2969	0
8	25	109.49	18.2969	0
8	26	109.49	18.2969	0
8	27	109.49	18.2969	0
8	28	109.49	18.2969	0
8	29	109.49	18.2969	0
8	30	109.49	18.2969	0
8	31	109.49	18.2969	0
8	32	109.49	18.2969	0
8	33	109.49	18.2969	0
8	34	109.49	18.2969	0
8	35	109.49	18.2969	0
8	36	109.49	18.2969	0
8	37	109.49	18.2969	0
8	38	109.49	18.2969	0
8	39	109.49	18.2969	0
8	40	109.49	18.2969	0
8	41	109.49	18.2969	0
8	42	109.49	18.2969	0
8	43	109.49	18.2969	0
8	44	109.49	18.2969	0
8	45	109.49	18.2969	0
8	46	109.49	18.2969	0
8	47	109.49	18.2969	0
8	48	109.49	18.2969	0
8	49	109.49	18.2969	0
8	50	109.49	18.2969	0
8	51	109.49	18.2969	0
8	52	109.49	18.2969	0
8	53	109.49	18.2969	0
8	54	109.49	18.2969	0
8	55	109.49	18.2969	0
8	56	109.49	18.2969	0
8	57	109.49	18.2969	0
8	58	109.49	18.2969	0
8	59	109.49	18.2969	0
9	0	109.483	18.2894	1
9	1	109.48	18.2895	1
9	2	109.48	18.2895	0
9	3	109.48	18.2895	0
9	4	109.48	18.2895	0
9	5	109.48	18.2895	0
9	6	109.48	18.2895	0
9	7	109.48	18.2895	0
9	8	109.48	18.2895	0
9	9	109.48	18.2895	0
9	10	109.48	18.2895	0
9	11	109.48	18.2895	0
9	12	109.48	18.2895	0
9	13	109.48	18.2895	0
9	14	109.48	18.2895	0
9	15	109.48	18.2895	0
9	16	109.48	18.2895	0
9	17	109.48	18.2895	0
9	18	109.48	18.2895	0
9	19	109.48	18.2895	0
9	20	109.48	18.2895	0
9	21	109.48	18.2895	0
9	22	109.48	18.2895	0
9	23	109.48	18.2895	0
9	24	109.48	18.2893	1
9	25	109.484	18.2893	1
9	26	109.484	18.2893	1
9	27	109.49	18.2892	1
9	28	109.495	18.2891	1
9	29	109.497	18.2888	1
9	30	109.499	18.288	1
9	31	109.499	18.288	1
9	32	109.499	18.2878	1
9	33	109.499	18.2876	1
9	34	109.499	18.2876	1
9	35	109.5	18.2881	1
9	36	109.508	18.2925	1
9	37	109.512	18.2943	1
9	38	109.513	18.2947	1
9	39	109.513	18.2948	1
9	40	109.515	18.2955	1
9	41	109.519	18.2971	1
9	42	109.522	18.2981	1
9	43	109.527	18.299	1
9	44	109.528	18.2961	1
9	45	109.528	18.2961	0
9	46	109.525	18.2991	1
9	47	109.522	18.298	1
9	48	109.521	18.2975	1
9	49	109.523	18.2983	1
9	50	109.527	18.2989	1
9	51	109.529	18.2935	1
9	52	109.525	18.2904	1
9	53	109.521	18.2877	1
9	54	109.52	18.2881	1
9	55	109.52	18.2881	0
9	56	109.52	18.2881	0
9	57	109.52	18.2881	0
9	58	109.52	18.2881	0
9	59	109.52	18.2881	0
10	0	109.694	18.3302	1
10	1	109.692	18.322	1
10	2	109.691	18.3108	1
10	3	109.692	18.3016	1
10	4	109.693	18.3001	1
10	5	109.694	18.2993	1
10	6	109.7	18.2965	1
10	7	109.703	18.2956	1
10	8	109.706	18.2949	1
10	9	109.71	18.2929	1
10	10	109.711	18.2918	1
10	11	109.711	18.2917	1
10	12	109.711	18.2914	1
10	13	109.711	18.2914	1
10	14	109.711	18.2914	1
10	15	109.711	18.2914	1
10	16	109.711	18.2914	0
10	17	109.711	18.2914	0
10	18	109.711	18.2914	0
10	19	109.711	18.2914	0
10	20	109.711	18.2914	0
10	21	109.711	18.2914	0
10	22	109.711	18.2914	0
10	23	109.711	18.2914	0
10	24	109.711	18.2914	0
10	25	109.711	18.2914	0
10	26	109.711	18.2914	0
10	27	109.711	18.2914	0
10	28	109.711	18.2914	0
10	29	109.711	18.2914	0
10	30	109.711	18.2914	0
10	31	109.711	18.2914	0
10	32	109.711	18.2914	0
10	33	109.711	18.2914	0
10	34	109.711	18.2914	0
10	35	109.711	18.2914	0
10	36	109.711	18.2914	0
10	37	109.711	18.2914	0
10	38	109.711	18.2914	0
10	39	109.711	18.2914	0
10	40	109.711	18.2914	0
10	41	109.711	18.2914	0
10	42	109.711	18.2914	1
10	43	109.709	18.2937	1
10	44	109.708	18.2946	1
10	45	109.703	18.2954	1
10	46	109.7	18.2966	1
10	47	109.694	18.2994	1
10	48	109.693	18.3001	1
10	49	109.69	18.3061	1
10	50	109.693	18.3171	1
10	51	109.69	18.3273	1
10	52	109.687	18.3314	1
10	53	109.68	18.3253	1
10	54	109.668	18.3225	1
10	55	109.661	18.3251	1
10	56	109.65	18.3303	1
10	57	109.638	18.3284	1
10	58	109.624	18.3235	1
10	59	109.611	18.3257	1
11	0	109.491	18.2961	1
11	1	109.491	18.2961	1
11	2	109.491	18.2961	1
11	3	109.491	18.2961	1
11	4	109.491	18.2961	1
11	5	109.491	18.2961	1
11	6	109.491	18.2961	1
11	7	109.491	18.2961	1
11	8	109.491	18.2961	1
11	9	109.491	18.2961	1
11	10	109.491	18.2961	1
11	11	109.491	18.2961	1
11	12	109.491	18.2961	1
11	13	109.491	18.2961	1
11	14	109.49	18.2962	1
11	15	109.486	18.2963	1
11	16	109.483	18.2993	1
11	17	109.484	18.3071	1
11	18	109.487	18.3156	1
11	19	109.49	18.3217	1
11	20	109.487	18.3244	1
11	21	109.476	18.3246	1
11	22	109.462	18.3241	1
11	23	109.449	18.3188	1
11	24	109.436	18.3165	1
11	25	109.427	18.3175	1
11	26	109.415	18.317	1
11	27	109.403	18.319	1
11	28	109.388	18.3209	1
11	29	109.374	18.3146	1
11	30	109.361	18.3157	1
11	31	109.351	18.3238	1
11	32	109.339	18.3209	1
11	33	109.326	18.3177	1
11	34	109.312	18.3211	1
11	35	109.297	18.3189	1
11	36	109.282	18.3135	1
11	37	109.269	18.3167	1
11	38	109.258	18.3223	1
11	39	109.248	18.321	1
11	40	109.243	18.3196	1
11	41	109.24	18.317	1
11	42	109.23	18.3192	1
11	43	109.222	18.3189	1
11	44	109.213	18.3184	1
11	45	109.206	18.3184	1
11	46	109.205	18.3129	1
11	47	109.205	18.3105	1
11	48	109.205	18.3082	1
11	49	109.205	18.3076	1
11	50	109.205	18.3074	1
11	51	109.205	18.3074	0
11	52	109.205	18.3074	0
11	53	109.205	18.3074	0
11	54	109.205	18.3074	0
11	55	109.205	18.3074	0
11	56	109.205	18.3074	0
11	57	109.205	18.3074	0
11	58	109.205	18.3074	0
11	59	109.205	18.3074	0
12	0	109.431	18.2894	0
12	1	109.431	18.2894	0
12	2	109.431	18.2894	0
12	3	109.431	18.2894	0
12	4	109.431	18.2894	0
12	5	109.431	18.2894	0
12	6	109.431	18.2894	0
12	7	109.431	18.2894	0
12	8	109.431	18.2894	0
12	9	109.431	18.2893	1
12	10	109.434	18.2891	1
12	11	109.436	18.2888	1
12	12	109.439	18.2883	1
12	13	109.446	18.2868	1
12	14	109.452	18.2849	1
12	15	109.456	18.2836	1
12	16	109.464	18.2805	1
12	17	109.472	18.276	1
12	18	109.479	18.2717	1
12	19	109.482	18.2689	1
12	20	109.483	18.2678	1
12	21	109.487	18.2643	1
12	22	109.49	18.2613	1
12	23	109.492	18.2591	1
12	24	109.494	18.2566	1
12	25	109.496	18.2552	1
12	26	109.497	18.2555	1
12	27	109.497	18.2555	0
12	28	109.497	18.2555	0
12	29	109.497	18.2555	0
12	30	109.497	18.2554	1
12	31	109.497	18.2557	1
12	32	109.496	18.2562	1
12	33	109.496	18.2589	1
12	34	109.494	18.2623	1
12	35	109.491	18.2621	1
12	36	109.488	18.2638	1
12	37	109.487	18.2644	1
12	38	109.486	18.2649	1
12	39	109.486	18.2653	1
12	40	109.485	18.2659	1
12	41	109.483	18.2685	1
12	42	109.479	18.2713	1
12	43	109.474	18.2753	1
12	44	109.466	18.2794	1
12	45	109.458	18.2829	1
12	46	109.454	18.2844	1
12	47	109.449	18.2859	1
12	48	109.443	18.2874	1
12	49	109.439	18.2898	1
12	50	109.438	18.2938	1
12	51	109.438	18.2985	1
12	52	109.435	18.2987	1
12	53	109.434	18.2988	1
12	54	109.434	18.2988	0
12	55	109.434	18.2988	0
12	56	109.434	18.2988	0
12	57	109.434	18.2988	0
12	58	109.434	18.2988	0
12	59	109.434	18.2988	0
13	0	109.527	18.2271	0
13	1	109.527	18.2271	0
13	2	109.527	18.2271	0
13	3	109.527	18.2271	0
13	4	109.527	18.2271	0
13	5	109.527	18.2271	0
13	6	109.527	18.2271	0
13	7	109.527	18.2271	0
13	8	109.527	18.2271	0
13	9	109.527	18.2271	0
13	10	109.527	18.2271	0
13	11	109.527	18.2271	0
13	12	109.527	18.2271	0
13	13	109.527	18.2271	0
13	14	109.527	18.2271	0
13	15	109.527	18.2271	0
13	16	109.527	18.2271	0
13	17	109.527	18.2271	0
13	18	109.527	18.2271	0
13	19	109.527	18.2271	0
13	20	109.527	18.2271	0
13	21	109.527	18.2271	0
13	22	109.528	18.2279	1
13	23	109.525	18.2258	1
13	24	109.519	18.2266	1
13	25	109.515	18.2308	1
13	26	109.516	18.2344	1
13	27	109.516	18.2405	1
13	28	109.516	18.2451	1
13	29	109.517	18.2504	1
13	30	109.517	18.2523	1
13	31	109.517	18.2525	1
13	32	109.517	18.2542	1
13	33	109.517	18.2547	1
13	34	109.517	18.2562	1
13	35	109.517	18.2619	1
13	36	109.516	18.2679	1
13	37	109.516	18.2687	1
13	38	109.515	18.2705	1
13	39	109.512	18.2744	1
13	40	109.51	18.2765	1
13	41	109.508	18.2779	1
13	42	109.505	18.2808	1
13	43	109.502	18.2848	1
13	44	109.501	18.2855	1
13	45	109.501	18.2862	1
13	46	109.5	18.2866	1
13	47	109.5	18.2872	1
13	48	109.496	18.2891	1
13	49	109.49	18.2893	1
13	50	109.484	18.2893	1
13	51	109.475	18.2903	1
13	52	109.467	18.2952	1
13	53	109.458	18.2979	1
13	54	109.451	18.3	1
13	55	109.447	18.3013	1
13	56	109.441	18.302	1
13	57	109.438	18.3022	1
13	58	109.433	18.3013	1
13	59	109.431	18.301	1
14	0	109.623	18.2283	0
14	1	109.623	18.2283	0
14	2	109.623	18.2283	0
14	3	109.623	18.2283	0
14	4	109.623	18.2283	0
14	5	109.623	18.2283	0
14	6	109.623	18.2283	0
14	7	109.623	18.2283	0
14	8	109.623	18.2283	0
14	9	109.623	18.2283	0
14	10	109.623	18.2283	0
14	11	109.623	18.2283	0
14	12	109.623	18.2283	0
14	13	109.623	18.2283	0
14	14	109.623	18.2283	0
14	15	109.623	18.2283	0
14	16	109.623	18.2283	0
14	17	109.623	18.2283	0
14	18	109.623	18.2283	0
14	19	109.623	18.2283	0
14	20	109.623	18.2283	0
14	21	109.623	18.2283	0
14	22	109.623	18.2283	0
14	23	109.623	18.2283	0
14	24	109.623	18.2283	0
14	25	109.623	18.2283	0
14	26	109.623	18.2283	0
14	27	109.623	18.2283	0
14	28	109.623	18.2283	0
14	29	109.623	18.2283	0
14	30	109.623	18.2283	0
14	31	109.623	18.2283	0
14	32	109.623	18.2283	0
14	33	109.623	18.2283	0
14	34	109.623	18.2283	0
14	35	109.623	18.2283	0
14	36	109.623	18.2283	0
14	37	109.623	18.2283	0
14	38	109.623	18.2283	0
14	39	109.623	18.2283	0
14	40	109.623	18.2283	0
14	41	109.623	18.2282	1
14	42	109.623	18.2282	1
14	43	109.623	18.2282	1
14	44	109.623	18.2282	1
14	45	109.623	18.2282	1
14	46	109.623	18.2282	1
14	47	109.623	18.2282	1
14	48	109.623	18.2282	1
14	49	109.623	18.2282	1
14	50	109.623	18.2282	1
14	51	109.623	18.2282	1
14	52	109.623	18.2283	1
14	53	109.623	18.2283	1
14	54	109.623	18.2283	1
14	55	109.623	18.2282	1
14	56	109.623	18.2283	1
14	57	109.623	18.2283	1
14	58	109.623	18.2283	1
14	59	109.623	18.2283	1
15	0	109.438	18.3023	0
15	1	109.438	18.3023	0
15	2	109.438	18.3023	0
15	3	109.438	18.3023	0
15	4	109.438	18.3023	0
15	5	109.438	18.3023	0
15	6	109.438	18.3023	0
15	7	109.438	18.3023	0
15	8	109.438	18.3023	0
15	9	109.438	18.3023	0
15	10	109.438	18.3023	0
15	11	109.438	18.3023	0
15	12	109.438	18.3023	0
15	13	109.438	18.3023	0
15	14	109.438	18.3023	0
15	15	109.438	18.3023	0
15	16	109.438	18.3023	0
15	17	109.438	18.3023	0
15	18	109.438	18.3023	0
15	19	109.438	18.3023	0
15	20	109.438	18.3023	0
15	21	109.438	18.3023	0
15	22	109.438	18.3023	0
15	23	109.438	18.3023	0
15	24	109.438	18.3023	0
15	25	109.438	18.3023	0
15	26	109.438	18.3023	0
15	27	109.438	18.3023	0
15	28	109.438	18.3023	0
15	29	109.438	18.3023	0
15	30	109.438	18.3023	0
15	31	109.438	18.3023	0
15	32	109.438	18.3023	0
15	33	109.438	18.3023	0
15	34	109.438	18.3023	0
15	35	109.438	18.3023	0
15	36	109.438	18.3023	0
15	37	109.438	18.3023	0
15	38	109.438	18.3023	0
15	39	109.438	18.3023	0
15	40	109.438	18.3023	0
15	41	109.438	18.3023	0
15	42	109.438	18.3023	0
15	43	109.438	18.3023	0
15	44	109.438	18.3023	0
15	45	109.438	18.3023	0
15	46	109.438	18.3023	0
15	47	109.438	18.3023	0
15	48	109.438	18.3023	0
15	49	109.438	18.3023	0
15	50	109.438	18.3023	0
15	51	109.438	18.3023	0
15	52	109.438	18.3023	0
15	53	109.438	18.3023	0
15	54	109.438	18.3023	0
15	55	109.438	18.3023	0
15	56	109.438	18.3023	0
15	57	109.438	18.3023	0
15	58	109.438	18.3023	0
15	59	109.438	18.3023	0
16	0	109.474	18.2761	0
16	1	109.474	18.2761	0
16	2	109.474	18.2761	0
16	3	109.474	18.2761	0
16	4	109.474	18.2761	0
16	5	109.474	18.2761	0
16	6	109.474	18.2761	0
16	7	109.474	18.2761	0
16	8	109.474	18.2761	0
16	9	109.474	18.2761	0
16	10	109.474	18.2761	0
16	11	109.474	18.2761	0
16	12	109.474	18.2761	0
16	13	109.474	18.2761	0
16	14	109.474	18.2761	0
16	15	109.474	18.2761	0
16	16	109.474	18.2761	0
16	17	109.474	18.2761	0
16	18	109.474	18.2761	0
16	19	109.474	18.2761	0
16	20	109.474	18.2761	0
16	21	109.474	18.2761	0
16	22	109.474	18.2761	0
16	23	109.474	18.2761	0
16	24	109.474	18.2761	0
16	25	109.474	18.2761	0
16	26	109.474	18.2761	0
16	27	109.474	18.2761	0
16	28	109.474	18.2761	0
16	29	109.474	18.2761	0
16	30	109.474	18.2761	0
16	31	109.474	18.2761	0
16	32	109.474	18.2761	0
16	33	109.474	18.2761	0
16	34	109.474	18.2761	0
16	35	109.474	18.2761	0
16	36	109.474	18.2761	0
16	37	109.474	18.2761	0
16	38	109.474	18.2761	0
16	39	109.474	18.2761	0
16	40	109.474	18.2761	0
16	41	109.474	18.2761	0
16	42	109.474	18.2761	0
16	43	109.474	18.2761	0
16	44	109.474	18.2761	0
16	45	109.474	18.2761	0
16	46	109.474	18.2761	0
16	47	109.474	18.2761	0
16	48	109.474	18.2761	0
16	49	109.474	18.2761	0
16	50	109.474	18.2761	0
16	51	109.474	18.2761	0
16	52	109.474	18.2761	0
16	53	109.474	18.2761	0
16	54	109.474	18.2761	0
16	55	109.474	18.2761	0
16	56	109.474	18.2761	0
16	57	109.474	18.2761	0
16	58	109.474	18.2761	0
16	59	109.474	18.2761	0
17	0	109.494	18.2741	1
17	1	109.495	18.2728	1
17	2	109.499	18.2696	1
17	3	109.499	18.269	1
17	4	109.502	18.2654	1
17	5	109.506	18.261	1
17	6	109.507	18.2556	1
17	7	109.507	18.2542	1
17	8	109.507	18.2497	1
17	9	109.508	18.2469	1
17	10	109.51	18.2467	1
17	11	109.511	18.2466	1
17	12	109.512	18.2468	1
17	13	109.512	18.2508	1
17	14	109.514	18.2547	1
17	15	109.519	18.2554	1
17	16	109.525	18.2538	1
17	17	109.531	18.2526	1
17	18	109.531	18.2526	1
17	19	109.542	18.238	1
17	20	109.543	18.2371	1
17	21	109.55	18.2398	1
17	22	109.555	18.2428	1
17	23	109.557	18.2439	1
17	24	109.558	18.2429	1
17	25	109.559	18.2427	1
17	26	109.559	18.2427	0
17	27	109.559	18.2427	0
17	28	109.559	18.2427	0
17	29	109.559	18.2427	0
17	30	109.559	18.2427	0
17	31	109.559	18.2427	0
17	32	109.559	18.2427	0
17	33	109.559	18.2427	0
17	34	109.559	18.2427	0
17	35	109.559	18.2427	0
17	36	109.559	18.2427	0
17	37	109.559	18.2427	0
17	38	109.559	18.2427	0
17	39	109.559	18.2427	0
17	40	109.559	18.2427	0
17	41	109.559	18.2427	0
17	42	109.559	18.2427	0
17	43	109.559	18.2427	0
17	44	109.559	18.2427	0
17	45	109.559	18.2427	0
17	46	109.559	18.2427	0
17	47	109.559	18.2427	0
17	48	109.559	18.2427	0
17	49	109.559	18.2427	0
17	50	109.559	18.2427	0
17	51	109.559	18.2427	0
17	52	109.559	18.2427	0
17	53	109.559	18.2427	0
17	54	109.559	18.2427	0
17	55	109.559	18.2427	0
17	56	109.559	18.2427	0
17	57	109.559	18.2427	0
17	58	109.559	18.2427	0
17	59	109.559	18.2427	0
18	0	109.446	18.2891	0
18	1	109.446	18.2891	0
18	2	109.446	18.2891	0
18	3	109.446	18.2891	0
18	4	109.446	18.2891	0
18	5	109.446	18.2891	0
18	6	109.446	18.2891	0
18	7	109.446	18.2891	0
18	8	109.446	18.2891	0
18	9	109.446	18.2891	0
18	10	109.446	18.2891	0
18	11	109.446	18.2891	0
18	12	109.446	18.2891	0
18	13	109.446	18.2891	0
18	14	109.446	18.2891	0
18	15	109.446	18.2891	0
18	16	109.446	18.2891	0
18	17	109.446	18.2891	0
18	18	109.446	18.2891	0
18	19	109.446	18.2891	0
18	20	109.446	18.2891	0
18	21	109.446	18.2891	0
18	22	109.446	18.2891	0
18	23	109.446	18.2891	0
18	24	109.446	18.2891	0
18	25	109.446	18.2891	0
18	26	109.446	18.2891	0
18	27	109.446	18.2891	0
18	28	109.446	18.2891	0
18	29	109.446	18.2891	0
18	30	109.452	18.2869	1
18	31	109.452	18.2861	1
18	32	109.448	18.2863	1
18	33	109.44	18.2882	1
18	34	109.436	18.2917	1
18	35	109.438	18.2975	1
18	36	109.438	18.3018	1
18	37	109.438	18.3021	1
18	38	109.438	18.3047	1
18	39	109.435	18.3069	1
18	40	109.43	18.3083	1
18	41	109.421	18.3096	1
18	42	109.417	18.3107	1
18	43	109.41	18.3105	1
18	44	109.406	18.3096	1
18	45	109.407	18.3095	1
18	46	109.407	18.3095	0
18	47	109.407	18.3095	0
18	48	109.407	18.3095	0
18	49	109.407	18.3095	0
18	50	109.407	18.3095	0
18	51	109.407	18.3095	0
18	52	109.407	18.3095	0
18	53	109.407	18.3095	0
18	54	109.407	18.3095	0
18	55	109.407	18.3095	0
18	56	109.407	18.3095	0
18	57	109.407	18.3095	0
18	58	109.407	18.3095	0
18	59	109.407	18.3095	0
19	0	109.714	18.2935	0
19	1	109.714	18.2935	0
19	2	109.714	18.2935	0
19	3	109.714	18.2935	0
19	4	109.714	18.2935	0
19	5	109.714	18.2935	0
19	6	109.714	18.2935	0
19	7	109.714	18.2935	0
19	8	109.714	18.2935	0
19	9	109.714	18.2935	0
19	10	109.714	18.2935	0
19	11	109.714	18.2935	0
19	12	109.714	18.2935	0
19	13	109.714	18.2935	0
19	14	109.714	18.2935	0
19	15	109.714	18.2935	0
19	16	109.714	18.2935	0
19	17	109.714	18.2935	0
19	18	109.714	18.2935	0
19	19	109.714	18.2935	0
19	20	109.714	18.2935	0
19	21	109.714	18.2935	0
19	22	109.714	18.2935	0
19	23	109.714	18.2935	0
19	24	109.714	18.2935	0
19	25	109.714	18.2935	0
19	26	109.714	18.2935	0
19	27	109.714	18.2935	0
19	28	109.714	18.2935	0
19	29	109.714	18.2935	0
19	30	109.714	18.2935	0
19	31	109.714	18.2935	0
19	32	109.714	18.2935	0
19	33	109.714	18.2935	0
19	34	109.714	18.2935	0
19	35	109.714	18.2935	0
19	36	109.714	18.2935	0
19	37	109.714	18.2935	0
19	38	109.714	18.2935	0
19	39	109.714	18.2935	0
19	40	109.715	18.2919	1
19	41	109.715	18.2914	1
19	42	109.716	18.2937	1
19	43	109.719	18.2959	1
19	44	109.722	18.3068	1
19	45	109.726	18.318	1
19	46	109.727	18.3268	1
19	47	109.73	18.3358	1
19	48	109.732	18.3433	1
19	49	109.735	18.3509	1
19	50	109.738	18.3598	1
19	51	109.741	18.3667	1
19	52	109.745	18.3725	1
19	53	109.745	18.3733	1
19	54	109.745	18.3733	1
19	55	109.745	18.3733	0
19	56	109.745	18.3733	0
19	57	109.745	18.3733	0
19	58	109.745	18.3733	0
19	59	109.745	18.3733	0
20	0	109.499	18.2594	0
20	1	109.499	18.2594	0
20	2	109.499	18.2594	0
20	3	109.499	18.2593	1
20	4	109.5	18.2564	1
20	5	109.5	18.2541	1
20	6	109.5	18.2533	1
20	7	109.501	18.2509	1
20	8	109.501	18.2483	1
20	9	109.502	18.2444	1
20	10	109.503	18.2403	1
20	11	109.503	18.2378	1
20	12	109.503	18.2376	1
20	13	109.508	18.2364	1
20	14	109.511	18.2356	1
20	15	109.513	18.2396	1
20	16	109.513	18.245	1
20	17	109.512	18.2487	1
20	18	109.513	18.2532	1
20	19	109.516	18.2552	1
20	20	109.517	18.2578	1
20	21	109.516	18.2648	1
20	22	109.517	18.2711	1
20	23	109.523	18.2736	1
20	24	109.524	18.2783	1
20	25	109.526	18.2834	1
20	26	109.525	18.2894	1
20	27	109.529	18.2923	1
20	28	109.529	18.293	1
20	29	109.53	18.2955	1
20	30	109.531	18.2965	1
20	31	109.53	18.2973	1
20	32	109.529	18.2973	1
20	33	109.528	18.2968	1
20	34	109.534	18.296	1
20	35	109.534	18.2969	1
20	36	109.534	18.3001	1
20	37	109.53	18.3003	1
20	38	109.527	18.3031	1
20	39	109.527	18.3045	1
20	40	109.525	18.3024	1
20	41	109.523	18.3024	1
20	42	109.523	18.3025	1
20	43	109.525	18.3029	1
20	44	109.527	18.301	1
20	45	109.527	18.3	1
20	46	109.528	18.2973	1
20	47	109.529	18.2931	1
20	48	109.529	18.2948	1
20	49	109.529	18.2947	1
20	50	109.529	18.2948	1
20	51	109.529	18.2948	1
20	52	109.529	18.2948	0
20	53	109.529	18.3001	1
20	54	109.534	18.3003	1
20	55	109.538	18.2975	1
20	56	109.537	18.2941	1
20	57	109.541	18.2933	1
20	58	109.55	18.29	1
20	59	109.559	18.2862	1
21	0	109.506	18.2605	1
21	1	109.503	18.2643	1
21	2	109.501	18.2671	1
21	3	109.5	18.2679	1
21	4	109.5	18.2682	1
21	5	109.498	18.2677	1
21	6	109.495	18.2662	1
21	7	109.492	18.2688	1
21	8	109.491	18.2697	1
21	9	109.49	18.2701	1
21	10	109.49	18.2704	1
21	11	109.49	18.2706	1
21	12	109.49	18.2707	1
21	13	109.49	18.2708	1
21	14	109.489	18.271	1
21	15	109.489	18.2711	1
21	16	109.489	18.2716	1
21	17	109.488	18.2719	1
21	18	109.488	18.2721	1
21	19	109.488	18.2723	1
21	20	109.488	18.2725	1
21	21	109.488	18.2734	1
21	22	109.49	18.2757	1
21	23	109.492	18.2791	1
21	24	109.492	18.2796	1
21	25	109.49	18.2829	1
21	26	109.489	18.2841	1
21	27	109.485	18.2883	1
21	28	109.485	18.2892	1
21	29	109.484	18.2939	1
21	30	109.487	18.2962	1
21	31	109.489	18.2973	1
21	32	109.488	18.2974	1
21	33	109.486	18.2963	1
21	34	109.483	18.2959	1
21	35	109.484	18.2908	1
21	36	109.485	18.2894	1
21	37	109.492	18.2891	1
21	38	109.495	18.2891	1
21	39	109.498	18.2884	1
21	40	109.499	18.2878	1
21	41	109.5	18.2862	1
21	42	109.505	18.2805	1
21	43	109.509	18.2774	1
21	44	109.511	18.2745	1
21	45	109.514	18.2715	1
21	46	109.515	18.2702	1
21	47	109.516	18.2645	1
21	48	109.517	18.2579	1
21	49	109.517	18.2554	1
21	50	109.517	18.2501	1
21	51	109.516	18.2448	1
21	52	109.516	18.2383	1
21	53	109.514	18.2339	1
21	54	109.514	18.2301	1
21	55	109.515	18.2317	1
21	56	109.516	18.2322	1
21	57	109.515	18.2325	1
21	58	109.516	18.2358	1
21	59	109.516	18.2418	1
22	0	109.496	18.3068	1
22	1	109.496	18.3068	1
22	2	109.496	18.3068	1
22	3	109.496	18.3068	1
22	4	109.497	18.3069	1
22	5	109.497	18.3069	1
22	6	109.497	18.3069	1
22	7	109.497	18.3069	1
22	8	109.497	18.3069	1
22	9	109.497	18.3069	1
22	10	109.497	18.3069	1
22	11	109.497	18.3069	1
22	12	109.497	18.3069	1
22	13	109.497	18.3068	1
22	14	109.497	18.3068	1
22	15	109.497	18.3068	1
22	16	109.497	18.3068	1
22	17	109.497	18.3068	1
22	18	109.497	18.3068	1
22	19	109.497	18.3068	1
22	20	109.497	18.3068	1
22	21	109.497	18.3069	1
22	22	109.497	18.3069	1
22	23	109.497	18.3069	1
22	24	109.497	18.3069	1
22	25	109.497	18.3069	1
22	26	109.497	18.3069	1
22	27	109.497	18.3069	1
22	28	109.497	18.3069	1
22	29	109.497	18.3069	1
22	30	109.497	18.3069	1
22	31	109.497	18.3069	1
22	32	109.497	18.3069	1
22	33	109.497	18.307	1
22	34	109.497	18.307	1
22	35	109.497	18.307	1
22	36	109.497	18.307	1
22	37	109.497	18.307	1
22	38	109.497	18.307	1
22	39	109.497	18.307	1
22	40	109.497	18.307	1
22	41	109.497	18.307	1
22	42	109.497	18.307	1
22	43	109.497	18.307	1
22	44	109.497	18.307	1
22	45	109.497	18.307	1
22	46	109.497	18.307	1
22	47	109.497	18.307	1
22	48	109.497	18.307	1
22	49	109.497	18.307	1
22	50	109.497	18.307	1
22	51	109.497	18.3069	1
22	52	109.496	18.3069	1
22	53	109.496	18.3068	1
22	54	109.496	18.3068	1
22	55	109.497	18.3069	1
22	56	109.497	18.3068	1
22	57	109.497	18.307	1
22	58	109.497	18.3071	1
22	59	109.497	18.3071	1
23	0	109.503	18.2626	1
23	1	109.503	18.2626	1
23	2	109.503	18.2626	1
23	3	109.503	18.2626	1
23	4	109.503	18.2626	1
23	5	109.503	18.2626	1
23	6	109.503	18.2626	1
23	7	109.503	18.2626	1
23	8	109.503	18.2626	1
23	9	109.503	18.2626	1
23	10	109.503	18.2626	1
23	11	109.503	18.2626	1
23	12	109.503	18.2626	1
23	13	109.503	18.2626	1
23	14	109.503	18.2626	1
23	15	109.503	18.2626	1
23	16	109.503	18.2626	1
23	17	109.503	18.2626	1
23	18	109.503	18.2626	1
23	19	109.503	18.2626	1
23	20	109.503	18.2626	1
23	21	109.503	18.2626	1
23	22	109.503	18.2626	1
23	23	109.503	18.2626	1
23	24	109.503	18.2626	1
23	25	109.503	18.2626	1
23	26	109.503	18.2626	1
23	27	109.503	18.2626	1
23	28	109.503	18.2626	1
23	29	109.503	18.2626	1
23	30	109.503	18.2626	1
23	31	109.503	18.2626	1
23	32	109.503	18.2626	1
23	33	109.503	18.2626	1
23	34	109.503	18.2626	1
23	35	109.503	18.2626	1
23	36	109.503	18.2626	1
23	37	109.503	18.2626	1
23	38	109.503	18.2626	1
23	39	109.503	18.2626	1
23	40	109.503	18.2626	1
23	41	109.503	18.2626	1
23	42	109.504	18.2628	1
23	43	109.504	18.2623	1
23	44	109.506	18.2615	1
23	45	109.506	18.2625	1
23	46	109.506	18.2619	1
23	47	109.506	18.2616	1
23	48	109.506	18.2613	1
23	49	109.506	18.2613	1
23	50	109.506	18.2606	1
23	51	109.506	18.2553	1
23	52	109.503	18.2553	1
23	53	109.502	18.2578	1
23	54	109.503	18.2579	1
23	55	109.503	18.2579	1
23	56	109.503	18.2579	1
23	57	109.503	18.2579	1
23	58	109.503	18.2579	1
23	59	109.503	18.2579	1
24	0	109.629	18.2369	0
24	1	109.629	18.2369	0
24	2	109.629	18.2369	0
24	3	109.629	18.2369	0
24	4	109.629	18.2369	0
24	5	109.629	18.2369	0
24	6	109.629	18.2369	0
24	7	109.629	18.2369	0
24	8	109.629	18.2369	0
24	9	109.629	18.2369	0
24	10	109.629	18.2369	0
24	11	109.629	18.2369	0
24	12	109.629	18.2369	0
24	13	109.629	18.2369	0
24	14	109.629	18.2369	0
24	15	109.629	18.2369	0
24	16	109.629	18.2369	0
24	17	109.629	18.2369	0
24	18	109.629	18.2369	0
24	19	109.629	18.2369	0
24	20	109.629	18.2369	0
24	21	109.629	18.2369	0
24	22	109.629	18.2369	0
24	23	109.629	18.2369	0
24	24	109.629	18.2369	0
24	25	109.629	18.2369	0
24	26	109.629	18.2369	0
24	27	109.629	18.2369	0
24	28	109.629	18.2369	0
24	29	109.629	18.2369	0
24	30	109.629	18.2369	0
24	31	109.629	18.2369	0
24	32	109.629	18.2369	0
24	33	109.629	18.2369	0
24	34	109.629	18.2369	0
24	35	109.629	18.2369	0
24	36	109.629	18.2369	0
24	37	109.629	18.2369	0
24	38	109.629	18.2369	0
24	39	109.629	18.2369	0
24	40	109.629	18.2369	0
24	41	109.629	18.2369	0
24	42	109.629	18.2369	0
24	43	109.629	18.2369	0
24	44	109.629	18.2369	0
24	45	109.629	18.2369	0
24	46	109.629	18.2369	0
24	47	109.629	18.2369	0
24	48	109.629	18.2369	0
24	49	109.629	18.2369	0
24	50	109.629	18.2369	0
24	51	109.629	18.2369	0
24	52	109.629	18.2369	0
24	53	109.629	18.2369	0
24	54	109.629	18.2369	0
24	55	109.629	18.2369	0
24	56	109.629	18.2369	0
24	57	109.629	18.2369	0
24	58	109.629	18.2369	0
24	59	109.629	18.2369	0
25	0	109.397	18.2905	1
25	1	109.391	18.2903	1
25	2	109.383	18.2899	1
25	3	109.376	18.2896	1
25	4	109.371	18.2904	1
25	5	109.372	18.2939	1
25	6	109.374	18.2964	1
25	7	109.374	18.2967	1
25	8	109.369	18.2965	1
25	9	109.364	18.295	1
25	10	109.363	18.2941	1
25	11	109.363	18.2941	1
25	12	109.363	18.2941	1
25	13	109.363	18.2941	1
25	14	109.363	18.2941	1
25	15	109.363	18.2941	1
25	16	109.363	18.2941	1
25	17	109.363	18.2941	1
25	18	109.363	18.2941	1
25	19	109.363	18.2941	1
25	20	109.363	18.2941	1
25	21	109.363	18.2941	1
25	22	109.363	18.2941	1
25	23	109.363	18.2941	1
25	24	109.363	18.2941	1
25	25	109.363	18.2941	1
25	26	109.363	18.2941	1
25	27	109.363	18.2941	1
25	28	109.363	18.2941	1
25	29	109.363	18.2941	1
25	30	109.363	18.2941	1
25	31	109.364	18.2941	1
25	32	109.364	18.2942	1
25	33	109.364	18.2942	1
25	34	109.364	18.2942	1
25	35	109.364	18.2942	1
25	36	109.364	18.2942	1
25	37	109.364	18.2942	1
25	38	109.364	18.2942	1
25	39	109.364	18.2942	1
25	40	109.364	18.2942	1
25	41	109.364	18.2942	1
25	42	109.364	18.2942	1
25	43	109.364	18.2942	1
25	44	109.364	18.2942	1
25	45	109.364	18.2942	1
25	46	109.364	18.2942	1
25	47	109.364	18.2942	1
25	48	109.364	18.2942	1
25	49	109.364	18.2942	1
25	50	109.364	18.2942	1
25	51	109.364	18.2942	1
25	52	109.364	18.2942	1
25	53	109.364	18.2942	1
25	54	109.364	18.2942	1
25	55	109.364	18.2942	1
25	56	109.364	18.2942	1
25	57	109.364	18.2942	1
25	58	109.364	18.2942	1
25	59	109.364	18.2942	1
26	0	109.516	18.2712	1
26	1	109.515	18.2703	1
26	2	109.511	18.2646	1
26	3	109.508	18.2625	1
26	4	109.507	18.2583	1
26	5	109.507	18.2551	1
26	6	109.507	18.2543	1
26	7	109.507	18.2536	1
26	8	109.507	18.2522	1
26	9	109.507	18.2522	1
26	10	109.507	18.2511	1
26	11	109.507	18.2511	0
26	12	109.507	18.2511	0
26	13	109.507	18.2511	0
26	14	109.507	18.2511	0
26	15	109.507	18.2511	0
26	16	109.507	18.2511	0
26	17	109.507	18.2511	0
26	18	109.507	18.2511	0
26	19	109.507	18.2511	0
26	20	109.507	18.2506	1
26	21	109.508	18.247	1
26	22	109.509	18.247	1
26	23	109.508	18.2502	1
26	24	109.509	18.2517	1
26	25	109.508	18.2537	1
26	26	109.507	18.2574	1
26	27	109.507	18.2601	1
26	28	109.506	18.2611	1
26	29	109.502	18.2655	1
26	30	109.5	18.2686	1
26	31	109.5	18.2688	1
26	32	109.499	18.2684	1
26	33	109.497	18.2678	1
26	34	109.497	18.2678	0
26	35	109.497	18.2678	0
26	36	109.497	18.2678	0
26	37	109.497	18.2678	0
26	38	109.497	18.2678	0
26	39	109.497	18.2678	0
26	40	109.497	18.2678	0
26	41	109.497	18.2678	0
26	42	109.497	18.2678	0
26	43	109.497	18.2678	0
26	44	109.497	18.2678	0
26	45	109.497	18.2678	0
26	46	109.497	18.2678	0
26	47	109.497	18.2678	0
26	48	109.497	18.2678	0
26	49	109.497	18.2678	0
26	50	109.497	18.2678	0
26	51	109.497	18.2678	0
26	52	109.497	18.2678	0
26	53	109.497	18.2678	0
26	54	109.498	18.2677	1
26	55	109.496	18.266	1
26	56	109.494	18.2641	1
26	57	109.493	18.2634	1
26	58	109.493	18.2622	1
26	59	109.495	18.2595	1
27	0	109.526	18.2906	1
27	1	109.532	18.2931	1
27	2	109.539	18.2935	1
27	3	109.548	18.2906	1
27	4	109.557	18.2868	1
27	5	109.565	18.2845	1
27	6	109.571	18.2828	1
27	7	109.575	18.2819	1
27	8	109.58	18.282	1
27	9	109.58	18.2821	1
27	10	109.581	18.2822	1
27	11	109.581	18.2823	1
27	12	109.581	18.2823	1
27	13	109.585	18.2833	1
27	14	109.592	18.2835	1
27	15	109.598	18.2811	1
27	16	109.605	18.2777	1
27	17	109.609	18.2721	1
27	18	109.61	18.264	1
27	19	109.615	18.2569	1
27	20	109.62	18.2503	1
27	21	109.622	18.2468	1
27	22	109.625	18.2468	1
27	23	109.625	18.2468	0
27	24	109.625	18.2468	0
27	25	109.625	18.2468	0
27	26	109.625	18.2468	0
27	27	109.625	18.2468	0
27	28	109.625	18.2468	0
27	29	109.625	18.2468	0
27	30	109.625	18.2468	0
27	31	109.625	18.2468	0
27	32	109.625	18.2468	0
27	33	109.625	18.2468	0
27	34	109.625	18.2468	0
27	35	109.625	18.2468	0
27	36	109.625	18.2468	0
27	37	109.625	18.2468	0
27	38	109.625	18.2468	0
27	39	109.625	18.2468	0
27	40	109.625	18.2468	0
27	41	109.625	18.2468	0
27	42	109.625	18.2468	0
27	43	109.625	18.2468	0
27	44	109.625	18.2468	0
27	45	109.625	18.2468	0
27	46	109.625	18.2468	0
27	47	109.625	18.2468	0
27	48	109.625	18.2468	0
27	49	109.625	18.2468	0
27	50	109.625	18.2468	0
27	51	109.625	18.2468	0
27	52	109.625	18.2468	0
27	53	109.625	18.2468	0
27	54	109.625	18.2468	0
27	55	109.625	18.2468	0
27	56	109.625	18.2468	0
27	57	109.625	18.2468	0
27	58	109.625	18.2468	0
27	59	109.625	18.2468	0
28	0	109.434	18.3004	1
28	1	109.438	18.3024	1
28	2	109.437	18.3049	1
28	3	109.436	18.3062	1
28	4	109.43	18.3081	1
28	5	109.423	18.309	1
28	6	109.418	18.3107	1
28	7	109.415	18.3105	1
28	8	109.408	18.3105	1
28	9	109.407	18.3093	1
28	10	109.408	18.3095	1
28	11	109.408	18.3095	0
28	12	109.408	18.3095	0
28	13	109.408	18.3095	0
28	14	109.408	18.3095	0
28	15	109.408	18.3095	0
28	16	109.408	18.3095	0
28	17	109.408	18.3095	0
28	18	109.408	18.3095	0
28	19	109.408	18.3095	0
28	20	109.408	18.3095	0
28	21	109.408	18.3095	0
28	22	109.408	18.3095	0
28	23	109.408	18.3095	0
28	24	109.408	18.3095	0
28	25	109.408	18.3095	0
28	26	109.408	18.3095	0
28	27	109.408	18.3095	0
28	28	109.408	18.3095	0
28	29	109.408	18.3095	0
28	30	109.408	18.3095	0
28	31	109.408	18.3095	0
28	32	109.408	18.3095	0
28	33	109.408	18.3095	0
28	34	109.408	18.3095	0
28	35	109.408	18.3095	0
28	36	109.408	18.3095	0
28	37	109.408	18.3095	0
28	38	109.408	18.3095	0
28	39	109.408	18.3095	0
28	40	109.408	18.3095	0
28	41	109.408	18.3095	0
28	42	109.408	18.3095	0
28	43	109.408	18.3095	0
28	44	109.408	18.3095	0
28	45	109.408	18.3095	0
28	46	109.408	18.3095	0
28	47	109.408	18.3095	0
28	48	109.408	18.3095	0
28	49	109.408	18.3095	0
28	50	109.408	18.3095	0
28	51	109.408	18.3095	0
28	52	109.408	18.3095	0
28	53	109.408	18.3095	0
28	54	109.408	18.3095	0
28	55	109.408	18.3095	0
28	56	109.408	18.3095	0
28	57	109.408	18.3095	0
28	58	109.408	18.3095	0
28	59	109.408	18.3095	0
29	0	109.48	18.2978	0
29	1	109.48	18.2978	0
29	2	109.48	18.2978	0
29	3	109.48	18.2978	0
29	4	109.48	18.2978	0
29	5	109.48	18.2978	0
29	6	109.48	18.2978	0
29	7	109.48	18.2978	0
29	8	109.48	18.2978	0
29	9	109.48	18.2978	0
29	10	109.48	18.2978	0
29	11	109.48	18.2978	0
29	12	109.48	18.2978	0
29	13	109.48	18.2978	0
29	14	109.48	18.2978	0
29	15	109.48	18.2978	0
29	16	109.48	18.2978	0
29	17	109.48	18.2978	0
29	18	109.48	18.2978	0
29	19	109.48	18.2978	0
29	20	109.48	18.2978	0
29	21	109.48	18.2978	0
29	22	109.48	18.2978	0
29	23	109.48	18.2978	0
29	24	109.48	18.2978	0
29	25	109.48	18.2978	0
29	26	109.48	18.2978	0
29	27	109.48	18.2978	0
29	28	109.48	18.2978	0
29	29	109.48	18.2978	0
29	30	109.48	18.2978	0
29	31	109.48	18.2978	0
29	32	109.48	18.2978	0
29	33	109.48	18.2978	0
29	34	109.48	18.2978	0
29	35	109.48	18.2978	0
29	36	109.48	18.2978	0
29	37	109.48	18.2978	0
29	38	109.48	18.2978	0
29	39	109.48	18.2978	0
29	40	109.48	18.2978	0
29	41	109.48	18.2978	0
29	42	109.48	18.2978	0
29	43	109.48	18.2978	0
29	44	109.48	18.2978	0
29	45	109.48	18.2978	0
29	46	109.48	18.2978	0
29	47	109.48	18.2978	0
29	48	109.484	18.2963	1
29	49	109.483	18.2954	1
29	50	109.484	18.2901	1
29	51	109.485	18.2894	1
29	52	109.492	18.2891	1
29	53	109.495	18.2891	1
29	54	109.497	18.2887	1
29	55	109.499	18.2881	1
29	56	109.499	18.288	1
29	57	109.499	18.2878	1
29	58	109.499	18.2878	1
29	59	109.5	18.2877	1
30	0	109.736	18.3504	0
30	1	109.736	18.3504	0
30	2	109.736	18.3507	1
30	3	109.736	18.3546	1
30	4	109.735	18.3515	1
30	5	109.731	18.3406	1
30	6	109.728	18.3303	1
30	7	109.726	18.3204	1
30	8	109.718	18.3208	1
30	9	109.708	18.3226	1
30	10	109.703	18.3253	1
30	11	109.703	18.3256	1
30	12	109.703	18.3254	1
30	13	109.698	18.3254	1
30	14	109.688	18.3302	1
30	15	109.685	18.3295	1
30	16	109.674	18.3224	1
30	17	109.664	18.3239	1
30	18	109.657	18.3274	1
30	19	109.641	18.3293	1
30	20	109.628	18.3247	1
30	21	109.615	18.3245	1
30	22	109.609	18.3261	1
30	23	109.595	18.3222	1
30	24	109.577	18.3198	1
30	25	109.562	18.3208	1
30	26	109.547	18.3178	1
30	27	109.532	18.3159	1
30	28	109.519	18.3189	1
30	29	109.51	18.3255	1
30	30	109.5	18.3253	1
30	31	109.484	18.3242	1
30	32	109.47	18.3249	1
30	33	109.456	18.3219	1
30	34	109.445	18.3174	1
30	35	109.442	18.3155	1
30	36	109.443	18.3082	1
30	37	109.438	18.3058	1
30	38	109.432	18.3081	1
30	39	109.43	18.3082	1
30	40	109.422	18.3095	1
30	41	109.414	18.3104	1
30	42	109.407	18.3105	1
30	43	109.406	18.3093	1
30	44	109.408	18.3094	1
30	45	109.408	18.3094	0
30	46	109.408	18.3094	0
30	47	109.408	18.3094	0
30	48	109.408	18.3094	0
30	49	109.408	18.3094	0
30	50	109.408	18.3094	0
30	51	109.408	18.3094	0
30	52	109.408	18.3094	0
30	53	109.408	18.3094	0
30	54	109.408	18.3094	0
30	55	109.408	18.3094	0
30	56	109.408	18.3094	0
30	57	109.408	18.3094	0
30	58	109.408	18.3094	0
30	59	109.408	18.3094	0
31	0	109.487	18.2855	1
31	1	109.489	18.2834	1
31	2	109.492	18.2802	1
31	3	109.494	18.276	1
31	4	109.497	18.2715	1
31	5	109.499	18.2695	1
31	6	109.499	18.2694	1
31	7	109.501	18.2674	1
31	8	109.503	18.2639	1
31	9	109.506	18.2599	1
31	10	109.507	18.255	1
31	11	109.507	18.2513	1
31	12	109.507	18.2487	1
31	13	109.508	18.2444	1
31	14	109.509	18.2392	1
31	15	109.507	18.2369	1
31	16	109.504	18.2387	1
31	17	109.503	18.2426	1
31	18	109.503	18.2432	1
31	19	109.502	18.2441	1
31	20	109.502	18.2441	0
31	21	109.502	18.2441	0
31	22	109.502	18.2441	1
31	23	109.502	18.2465	1
31	24	109.501	18.2491	1
31	25	109.501	18.2518	1
31	26	109.5	18.2535	1
31	27	109.5	18.254	1
31	28	109.5	18.2541	1
31	29	109.5	18.2559	1
31	30	109.5	18.2563	1
31	31	109.502	18.257	1
31	32	109.502	18.2576	1
31	33	109.502	18.2576	1
31	34	109.502	18.2576	1
31	35	109.502	18.2576	1
31	36	109.502	18.2576	1
31	37	109.502	18.2576	1
31	38	109.501	18.2599	1
31	39	109.499	18.2623	1
31	40	109.496	18.2648	1
31	41	109.497	18.2672	1
31	42	109.499	18.2686	1
31	43	109.499	18.2687	1
31	44	109.498	18.2701	1
31	45	109.495	18.2741	1
31	46	109.493	18.2792	1
31	47	109.491	18.2824	1
31	48	109.49	18.2829	1
31	49	109.489	18.2842	1
31	50	109.485	18.2882	1
31	51	109.485	18.2891	1
31	52	109.484	18.2921	1
31	53	109.486	18.2962	1
31	54	109.49	18.2968	1
31	55	109.489	18.2973	1
31	56	109.488	18.2974	1
31	57	109.488	18.2971	1
31	58	109.484	18.2961	1
31	59	109.484	18.2916	1
32	0	109.58	18.2821	0
32	1	109.58	18.2821	0
32	2	109.58	18.2821	0
32	3	109.58	18.2821	0
32	4	109.58	18.2821	0
32	5	109.58	18.2821	0
32	6	109.58	18.2821	0
32	7	109.58	18.2821	0
32	8	109.58	18.2821	0
32	9	109.58	18.2821	0
32	10	109.58	18.2821	0
32	11	109.58	18.2821	0
32	12	109.58	18.2821	0
32	13	109.58	18.2821	0
32	14	109.58	18.2821	0
32	15	109.58	18.2821	0
32	16	109.58	18.2821	0
32	17	109.58	18.2821	0
32	18	109.58	18.2821	0
32	19	109.58	18.2821	0
32	20	109.58	18.2821	0
32	21	109.58	18.2821	0
32	22	109.58	18.2821	0
32	23	109.58	18.2821	0
32	24	109.579	18.28	1
32	25	109.58	18.2813	1
32	26	109.581	18.2816	1
32	27	109.581	18.2819	1
32	28	109.582	18.283	1
32	29	109.586	18.2864	1
32	30	109.592	18.2916	1
32	31	109.598	18.2981	1
32	32	109.597	18.3015	1
32	33	109.599	18.304	1
32	34	109.599	18.304	0
32	35	109.599	18.304	0
32	36	109.599	18.304	0
32	37	109.599	18.304	0
32	38	109.599	18.304	0
32	39	109.599	18.304	0
32	40	109.599	18.304	0
32	41	109.599	18.304	0
32	42	109.599	18.3037	1
32	43	109.594	18.3085	1
32	44	109.588	18.3119	1
32	45	109.583	18.3165	1
32	46	109.584	18.3201	1
32	47	109.596	18.3223	1
32	48	109.6	18.3239	1
32	49	109.612	18.3245	1
32	50	109.623	18.3229	1
32	51	109.632	18.326	1
32	52	109.637	18.3281	1
32	53	109.64	18.3292	1
32	54	109.644	18.3303	1
32	55	109.648	18.3307	1
32	56	109.652	18.3293	1
32	57	109.654	18.3284	1
32	58	109.659	18.3255	1
32	59	109.674	18.3218	1
33	0	109.491	18.2877	1
33	1	109.491	18.2877	1
33	2	109.491	18.2877	1
33	3	109.491	18.2877	1
33	4	109.491	18.2877	1
33	5	109.491	18.2877	1
33	6	109.491	18.2877	1
33	7	109.491	18.2877	1
33	8	109.491	18.2877	1
33	9	109.491	18.2877	1
33	10	109.491	18.2877	1
33	11	109.491	18.2877	1
33	12	109.491	18.2877	1
33	13	109.491	18.2877	1
33	14	109.491	18.2877	1
33	15	109.491	18.2877	1
33	16	109.491	18.2877	1
33	17	109.491	18.2877	1
33	18	109.491	18.2877	1
33	19	109.491	18.2877	1
33	20	109.491	18.2877	1
33	21	109.491	18.2877	1
33	22	109.491	18.2877	1
33	23	109.491	18.2877	1
33	24	109.491	18.2877	1
33	25	109.491	18.2877	1
33	26	109.491	18.2877	1
33	27	109.491	18.2877	1
33	28	109.491	18.2877	1
33	29	109.491	18.2877	1
33	30	109.491	18.2877	1
33	31	109.491	18.2877	1
33	32	109.491	18.2877	1
33	33	109.491	18.2877	1
33	34	109.491	18.2877	1
33	35	109.491	18.2877	1
33	36	109.491	18.2877	1
33	37	109.491	18.2877	1
33	38	109.491	18.2877	1
33	39	109.491	18.2877	1
33	40	109.491	18.2877	1
33	41	109.491	18.2877	1
33	42	109.491	18.2877	1
33	43	109.491	18.2877	1
33	44	109.491	18.2877	1
33	45	109.491	18.2877	1
33	46	109.491	18.2877	1
33	47	109.491	18.2877	1
33	48	109.491	18.2877	1
33	49	109.491	18.2877	1
33	50	109.491	18.2877	1
33	51	109.491	18.2877	1
33	52	109.491	18.2877	1
33	53	109.491	18.2877	0
33	54	109.491	18.2877	0
33	55	109.491	18.2877	0
33	56	109.491	18.2877	0
33	57	109.492	18.2868	1
33	58	109.49	18.2839	1
33	59	109.49	18.2832	1
34	0	109.575	18.282	0
34	1	109.575	18.282	0
34	2	109.575	18.282	0
34	3	109.575	18.282	0
34	4	109.575	18.282	0
34	5	109.575	18.282	0
34	6	109.575	18.282	0
34	7	109.575	18.282	0
34	8	109.575	18.282	0
34	9	109.575	18.282	0
34	10	109.575	18.282	0
34	11	109.575	18.282	0
34	12	109.575	18.282	0
34	13	109.575	18.282	0
34	14	109.575	18.282	0
34	15	109.575	18.282	0
34	16	109.575	18.282	0
34	17	109.575	18.282	0
34	18	109.575	18.282	0
[truncated: 1,062 more rows]

## Sheet: Comparison
No	Distance(total)		Distance(passenger=1)
	Actual	Modeled	Actual	Modeled
1	40.3765	9.22273	5.93167	8.61945
2	12.6781	12.7993	11.0993	12.557
3	17.8947	14.6313	15.8878	13.8446
4	51.8717	47.5812	47.5805	47.5805
5	13.7679	14.2705	9.20043	14.1918
6	12.4321	4.47331	10.2289	3.54837
7	12.2874	0	10.0801	0
8	16.452	5.98221	16.1659	5.98221
9	25.3842	9.7127	20.7912	9.20727
10	19.6889	20.3178	9.74877	20.3091
11	42.1788	37.433	37.433	37.433
12	11.0288	17.4639	9.56131	17.4357
13	2.34521	16.529	0	16.3555
14	0.458357	0.06994	0	0.0510594
15	4.96513	0	0	0
16	14.601	0.00560746	1.66453	0
17	20.1406	10.6757	10.6757	10.6757
18	0	8.03269	0	7.32888
19	27.8046	9.58185	25.7933	9.41517
20	9.99789	19.8733	5.6935	19.2958
21	12.9056	17.1967	6.10214	17.1967
22	0.183225	0.183225	0.183225	0.183225
23	1.86137	1.86137	1.86137	1.86137
24	0.0697656	0	0	0
25	4.82937	4.82937	4.82937	4.82937
26	13.2407	7.18316	5.88389	7.09482
27	38.4708	13.3844	23.2072	13.3808
28	13.3306	4.52347	4.52347	4.52347
29	4.82461	2.83397	0	2.42817
30	50.5691	42.239	42.2001	42.2001
31	8.61738	15.3391	6.98421	15.3258
32	32.9477	16.8342	0	16.545
33	0.452423	0.547373	0	0.438308
34	14.3925	10.3167	6.42403	9.82633
35	35.4595	25.8016	4.39114	25.7933
36	3.14801	7.7107	0.468906	7.45902
37	12.2535	19.8748	6.34366	19.4241
38	15.0381	8.27999	3.01793	8.22247
39	0	0	0	0
40	19.652	24.6349	9.49402	24.3799
41	15.1008	0	3.37848	0
42	25.2175	6.87868	20.2625	6.5042
43	10.9426	6.22609	2.2092	6.12835
44	34.9148	0	32.3591	0
45	15.0489	9.81904	7.4867	9.69096
46	0.196155	0	0	0
47	9.72501	3.42605	6.96527	3.4212
48	12.7807	18.6085	8.55378	18.5516
49	32.3261	19.0341	14.8221	18.9815
50	19.31	16.1302	15.2072	15.4565
51	10.0276	8.25865	8.23767	8.23767
52	7.59325	1.46872	2.57386	1.18518
53	14.0581	6.19365	6.19365	6.19365
54	10.3688	7.28875	9.06562	6.81066
55	40.2965	3.53132	25.2623	3.47682
56	6.16503	6.92554	5.01427	6.77503
57	6.70754	0	0	0
58	21.7275	1.62374	19.2752	1.62374
59	42.6899	4.0387	14.7234	4.0387
60	1.44399	10.0879	0	9.92685
61	20.6756	22.7439	17.0437	22.2036
62	16.9541	3.07084	1.1906	3.0229
63	5.74918	25.2772	0	25.2608
64	2.40662	0	1.10835	0
65	25.792	5.4419	16.4934	5.37663
66	22.6812	16.3952	22.2402	16.1446
67	0.0920259	0	0	0
68	0	0	0	0
69	5.86686	5.80001	5.79429	5.79429
70	0.120657	9.90137	0	9.67751
71	11.0833	20.7295	10.7971	20.2404
72	0	0	0	0
73	9.08513	0	4.57528	0
74	0.109306	23.6861	0	23.5573
75	17.2399	0	9.3381	0
76	21.0961	10.9702	14.3348	10.6144
77	38.2809	12.5649	32.0966	11.9715
78	19.2105	17.5506	16.1988	16.9249
79	28.0622	22.6594	26.88	22.6039
80	14.3367	17.4979	10.4059	17.0185
81	16.7758	11.1325	8.83112	10.8624
82	16.9819	12.4932	12.7778	12.3136
83	14.0457	12.6598	13.3973	12.6598
84	9.37626	17.5641	6.8889	17.2576
85	0.120493	0.120493	0.120493	0.120493
86	16.2604	14.1913	14.1847	14.1847
87	18.3824	11.1052	4.85679	10.9286
88	11.4884	12.7266	10.579	12.4616
89	0.336996	7.95038	0	6.68234
90	5.4632	0	1.84742	0
91	11.9122	5.18863	5.99727	5.08673
92	38.538	0	28.0749	0
93	0	0	0	0
94	25.9289	32.9801	18.0394	32.5913
95	20.8456	0.643453	16.536	0.643453
96	16.4479	10.9654	15.4951	10.9654
97	20.2727	22.1672	7.79736	21.3881
98	27.5406	7.42461	17.7304	7.3813
99	18.9448	5.85265	5.69251	5.50993
100	31.9423	14.4195	17.7502	13.1748
101	0.0752586	0	0	0
102	0	1.5767	0	1.50886
103	16.278	32.6408	13.3802	32.6408
104	11.0467	12.7944	8.26475	12.7816
105	18.7522	7.69775	11.9799	7.30671
106	20.0675	17.2054	14.8405	17.0882
107	12.5615	16.3358	1.20612	16.2052
108	40.8319	3.91444	40.6104	3.77627
109	15.4772	6.11379	11.2436	6.10391
110	4.49053	9.04419	3.24753	8.7064
111	13.5481	10.2459	10.2459	10.2459
112	7.18101	7.18101	7.18101	7.18101
113	23.7255	11.1289	19.8588	11.1289
114	20.4985	0	0	0
115	16.2265	21.6594	16.0904	21.6594
116	0.150191	0	0	0
117	15.1674	31.4181	12.9912	31.3575
118	0.201126	0	0	0
119	24.6608	0.00560746	19.2899	0
120	22.0319	16.8074	14.2132	16.7928
121	17.5344	13.9462	13.8087	13.1389
122	0	0	0	0
123	46.9326	19.753	41.5451	19.4351
124	7.83162	7.41051	7.41051	7.41051
125	10.9064	10.9064	10.9064	10.9064
126	0.209105	1.93076	0	1.76039
127	4.38566	10.4818	0.399643	9.38544
128	19.9302	13.2071	13.2071	13.2071
129	3.88921	3.86826	3.86139	3.86139
130	16.7699	0.00560746	13.3818	0
131	28.5903	0	0	0
132	0.00560746	9.47316	0	9.28488
133	14.0562	7.48942	12.967	7.10457
134	0.164173	3.00508	0	2.95634
135	21.6649	4.06374	0	4.05771
136	12.9245	28.9924	6.2107	28.7643
137	0.289552	13.3486	0	12.4532
138	0.154438	12.832	0.00204726	12.1925
139	13.5426	5.26089	7.64391	5.26089
140	21.6924	26.8788	19.2012	26.8668
141	30.6054	30.6054	30.6054	30.6054
142	22.5819	1.43196	18.8728	1.38895
143	1.1602	4.96338	0	4.8172
144	42.2913	3.67812	3.67812	3.67812
145	10.982	7.45684	8.03017	7.02982
146	31.8156	16.2481	20.4094	16.2481
147	10.2113	3.80272	0.398908	3.68178
148	3.44052	0.679033	2.47542	0.642533
149	12.9354	8.91622	12.0328	8.79228
150	14.967	17.4001	14.5468	17.4001
151	20.3434	13.7944	11.44	13.3349
152	31.026	0	0	0
153	14.65	7.67181	13.5452	7.652
154	9.49059	3.73332	3.72648	3.72648
155	4.1903	4.04873	4.02796	4.02796
156	18.2029	3.54934	12.0252	3.48582
157	8.52141	0.792816	2.79561	0.792816
158	25.3356	15.2497	20.8905	14.801
159	9.55085	0	3.31922	0
160	19.1003	1.2201	6.83385	1.2201
161	0.198785	0	0	0
162	0.144127	3.0583	0	2.79314
163	37.6171	21.34	35.5872	21.34
164	8.12953	0	3.42416	0
165	0.241237	0	0	0
166	23.3802	0	0	0
167	10.6603	6.36346	5.78428	6.30961
168	16.5478	0.00560746	14.9071	0
169	33.3232	21.6764	2.30761	21.6531
170	0.842321	3.5401	0	3.35128
171	28.2537	7.71768	16.3383	7.70524
172	23.3914	23.2519	23.2515	23.2515
173	51.3663	51.3663	51.3663	51.3663
174	20.1747	20.1747	20.1747	20.1747
175	15.9526	0	9.02928	0
176	0.00560746	0.00560746	0.00180579	0.00180579
177	12.9241	3.66287	7.97657	3.35694
178	21.543	21.016	21.0154	21.0154
179	37.2287	0	4.67785	0
180	5.19845	3.25492	5.1331	3.24753
181	13.9761	0	11.7264	0
182	0	0	0	0
183	43.0957	9.86158	2.19693	9.82563
184	10.5289	18.3896	9.94491	18.1504
185	20.2751	5.15165	10.9337	5.05266
186	23.2871	0	0	0
187	0.0788818	0	0	0
188	0.141962	0.141962	0.141962	0.141962
189	23.7117	25.0985	14.0563	24.4828
190	1.07742	7.3164	0	7.20795
191	0.0931878	8.73269	0	8.71315
192	26.8998	11.8728	22.7297	11.8728
193	30.176	30.0609	30.0609	30.0609
194	10.335	26.5103	10.335	26.357
195	4.06786	4.06786	4.06786	4.06786
196	15.1166	0.597086	9.26922	0.474358
197	18.8409	18.706	18.4403	18.4403
198	32.765	37.4468	30.464	37.0359
199	37.1895	0	0	0
200	7.57082	0	4.03435	0
201	22.2564	26.3287	18.4844	25.7978
202	0.623267	13.2675	0	12.8557
203	21.2952	16.8544	0	16.6829
204	27.3911	20.7864	23.7973	20.7864
205	30.1877	2.37232	16.7197	1.52535
206	21.7721	13.989	18.7754	13.2126
207	24.606	12.3696	12.1212	12.0516
208	3.92876	0	0	0
209	15.4812	14.5999	8.90979	14.2836
210	35.4742	10.992	34.9291	10.8197
211	0.580811	0.881794	0	0.812482
212	12.975	7.35298	8.90668	6.84043
213	18.8991	11.8755	18.2032	11.5432
214	15.4017	12.3991	9.2233	12.3743
215	0.00560746	10.4438	0	10.1683
216	18.0892	13.812	6.73395	13.5306
217	13.3058	15.7733	11.4499	15.6741
218	25.6432	16.7785	19.1134	16.3979
219	17.6579	8.33234	9.35935	8.11226
220	19.4811	5.16937	17.8167	5.1649
221	16.2228	13.5986	8.30451	13.4536
222	26.166	25.9718	25.9517	25.9517
223	2.80627	0.00560746	0	0
224	13.4033	19.1915	12.3682	18.838
225	31.1239	0	22.1509	0
226	27.2045	0	0.794034	0
227	17.9178	5.47697	12.3098	5.47697
228	33.9529	9.61427	32.9711	9.33046
229	16.7011	1.93834	12.8858	1.81977
230	0	3.423	0	3.358
231	16.0394	5.50956	10.2854	5.08913
232	18.0637	13.4611	7.19147	13.3896
233	40.977	35.9206	29.3307	35.9056
234	0.379991	0	0	0
235	23.9407	0	7.30477	0
236	19.8494	33.0984	1.33311	32.8977
237	36.534	1.11671	31.6189	1.11671
238	35.546	2.17283	31.8586	2.17283
239	4.87713	12.8765	4.43998	12.8019
240	4.29714	18.6669	1.81977	18.6077
241	29.4678	6.02342	27.8123	5.82748
242	10.1357	38.5968	8.04564	38.4006
243	10.5646	5.2815	7.39834	5.24434
244	12.6834	7.01157	12.0054	7.01157
245	13.1167	13.1722	12.8759	13.0464
246	9.66109	0	4.22739	0
247	13.8264	19.6588	2.14109	19.6029
248	11.5027	10.2275	10.0053	9.50399
249	29.6161	0	17.9474	0
250	0.122083	30.8489	0	30.8037
251	0.0932395	0.0932395	0.0932395	0.0932395
252	21.6646	18.7802	16.2981	18.6137
253	41.8208	1.60996	40.9491	1.60996
254	2.61006	9.88931	0	9.53946
255	4.60277	0.00560746	0	0
256	9.51814	10.8366	7.57872	10.6632
257	28.3761	5.43474	17.4813	5.33778
258	16.0856	3.8645	12.7413	3.72536
259	13.0842	9.34251	9.60153	9.32957
260	0.36676	0.36676	0.36676	0.36676
261	0.173738	3.38375	0	2.94846
262	12.3725	0	8.62598	0
263	0.0116032	7.57877	0	7.29072
264	40.5821	38.0493	26.5762	38.0185
265	10.8645	17.8294	10.6003	17.6734
266	27.272	0	3.90248	0
267	0.117265	0	0	0
268	2.51824	30.6715	0.1188	30.621
269	35.793	7.82318	19.0783	7.82318
270	0	0	0	0
271	1.48297	0	0	0
272	0.120039	0.195781	0	0.190466
273	26.6481	0.991562	19.1407	0.98624
274	34.5553	5.42923	31.3575	5.40021
275	8.89521	12.7358	2.91908	11.8604
276	12.4031	0	0	0
277	16.4624	20.1837	0	19.9736
278	4.1989	4.1989	4.1989	4.1989
279	15.149	8.70141	12.7816	8.68113
280	23.4429	14.9931	14.9931	14.9931
281	4.24946	3.282	0	3.05635
282	0.274289	0.00560746	0	0
283	0.786441	4.6868	0	3.99582
284	28.2536	17.5275	22.0254	17.1803
285	36.2714	4.53506	0	4.52973
286	15.2098	16.6709	7.63315	16.546
287	0.292898	1.44563	0	1.28449
288	0	0	0	0
289	8.64893	6.11496	7.03618	6.11496
290	20.0515	14.5034	14.5034	14.5034
291	0.182073	0.182073	0.182073	0.182073
292	22.7126	11.3969	14.1178	11.2913
293	7.91838	8.50967	6.22054	8.11668
294	14.8828	28.2735	2.32291	28.0749
295	19.1552	7.4753	15.4333	7.4753
296	0.184798	10.3128	0	10.2708
297	11.3343	7.22219	9.50265	6.79727
298	15.2435	13.5435	12.0459	13.3254
299	16.41	21.6922	6.30714	21.4256
300	37.6915	0.486264	8.74899	0
301	26.7268	29.1052	23.707	29.04
302	28.2949	11.5689	9.39153	11.2715
303	20.335	6.05273	0	5.89489
304	0.0499583	7.3687	0	7.11898
305	15.9634	15.5213	15.4959	15.4959
306	20.5097	3.06024	11.7724	3.06024
307	16.4032	0.00560746	1.52535	0
308	17.5051	16.7271	10.9744	16.568
309	8.33435	7.56837	5.02551	7.10687
310	1.34804	1.34804	1.34804	1.34804
311	12.4832	5.9864	0	5.82911
312	18.1665	9.59714	14.8688	9.49582
313	3.64414	0.442673	0.442673	0.442673
314	13.4464	16.5004	13.3419	15.7283
315	26.1393	0.00560746	20.6966	0
316	26.7183	8.31051	14.549	8.01371
317	0.546212	0.546212	0.546212	0.546212
318	16.4876	14.417	16.4086	14.3901
319	21.0337	19.222	5.1415	18.7319
320	0.173188	0	0	0
321	3.26186	16.0136	0	15.9902
322	3.16381	0	3.02625	0
323	32.2965	32.352	31.9991	32.352
324	0.0926871	30.1569	0	30.0254
325	9.33743	12.5022	5.77202	12.2331
326	14.0953	11.2828	10.1544	10.7857
327	23.3488	5.06944	5.06944	5.06944
328	0.26497	12.1262	0	12.0445
329	14.9243	19.4746	11.8288	19.2743
330	0.545579	0	0	0
331	2.77778	0	0	0
332	14.1422	8.05939	12.8583	7.99681
333	44.595	30.7906	30.7906	30.7906
334	11.49	5.87599	0	5.72676
335	1.88659	2.4084	0.662924	2.35396
336	15.0196	14.9779	14.9779	14.9779
337	5.9818	14.8252	2.8329	14.7257
338	0.930771	0.00560746	0	0
339	0.00560746	0.00560746	0.00209092	0.00209092
340	0	0	0	0
341	7.46769	8.39612	2.26859	8.13956
342	12.4955	4.6969	11.4898	4.56956
343	41.9649	6.97144	6.97144	6.97144
344	21.9585	21.175	10.996	21.0589
345	6.74229	2.33718	0	0
346	40.8477	6.13883	31.1021	6.05833
347	20.2747	11.8037	10.9963	11.4926
348	15.762	13.3213	13.449	13.3213
349	20.0637	19.3455	8.08684	19.3164
350	33.1885	18.3012	33.012	18.2292
351	17.2279	1.17799	4.61435	1.17799
352	23.2331	4.3995	17.4979	4.23553
353	20.0646	10.3128	8.68687	10.0649
354	12.7419	18.1715	9.75363	18.0613
355	39.5278	20.9834	39.4631	20.8799
356	0.00793014	16.7884	0.00322582	14.3854
357	16.7661	4.32431	10.2708	4.17702
358	1.75257	3.08184	0	2.83851
359	7.51277	23.0445	1.99812	22.8815
360	30.1626	25.0864	26	24.7553
361	0	14.7362	0	13.994
362	29.8616	17.0885	25.1402	16.8625
363	22.0715	35.6455	21.2581	35.5941
364	0.162785	7.79486	0	7.37032
365	2.38163	0	0	0
366	50.8931	4.47599	46.5434	4.47124
367	21.5213	6.92997	0.563485	6.63025
368	1.7119	13.2514	0	13.218
369	21.9138	11.0236	16.0417	9.88666
370	34.3973	15.0222	0	14.9102
371	0.104457	3.24971	0	2.66849
372	23.2305	18.016	0	17.3374
373	0.344768	6.48263	0	6.39254
374	0	3.04579	0	3.04579
375	17.9808	8.74137	2.25374	8.42192
376	14.6846	14.1153	10.7775	13.8757
377	1.52814	0	0	0
378	0	0	0	0
379	0.178988	6.76087	0	6.74763
380	0.00560746	19.6672	0.00427687	19.3924
381	2.0837	2.0837	2.0837	2.0837
382	4.86267	4.82389	4.82389	4.82389
383	4.76566	0.00560746	1.95338	0
384	0.0056331	0.0056331	0.0056331	0.0056331
385	44.798	42.491	42.491	42.491
386	0.18117	0.18117	0.18117	0.18117
387	27.0346	19.3609	26.7064	19.1509
388	51.6971	36.6703	36.6703	36.6703
389	26.9267	12.8735	20.4559	12.8735
390	4.47459	5.53936	0	5.4609
391	4.62103	2.92592	2.92592	2.92592
392	14.8087	4.86995	10.3149	3.99944
393	18.0071	13.2279	13.617	11.5555
394	5.28419	15.2393	1.27345	14.8661
395	8.54882	16.9818	0.0114117	16.8163
396	0.768849	13.2634	0	13.0321
397	10.2511	10.0758	10.0936	10.0743
398	29.6639	15.4019	23.7777	15.4019
399	1.42181	1.42181	1.42181	1.42181
400	16.0896	13.377	13.377	13.377
401	29.824	4.15485	4.15485	4.15485
402	14.596	4.20885	13.8057	4.20457
403	14.0793	3.42262	7.91191	3.06931
404	28.9646	27.6275	28.6446	27.3601
405	23.7849	7.19756	18.8938	7.08733
406	0.367153	0.367153	0.367153	0.367153
407	5.89928	1.07782	0	0.706027
408	0.546679	0	0	0
409	0.912767	9.68254	0	9.60774
410	0	5.58752	0	5.54864
411	11.7386	13.1248	8.88203	12.9013
412	9.78887	27.0428	0	26.7852
413	3.26527	0	0	0
414	2.1239	2.32006	0	2.2337
415	14.2171	12.5042	13.0834	12.0234
416	18.3097	0	4.23359	0
417	15.5638	13.8347	13.8347	13.8347
418	14.245	18.6819	13.7882	18.1351
419	42.2252	0	0	0
420	33.1056	16.8087	16.8087	16.8087
421	29.2469	13.4097	13.4058	13.4058
422	26.5284	6.87643	15.4238	6.43181
423	19.4964	21.0989	17.8086	21.016
424	12.9924	4.56432	4.36809	4.16146
425	16.2202	8.27901	10.4346	8.27901
426	18.8319	47.7667	12.0647	47.7444
427	17.098	1.19737	0	0
428	0.210245	0.210245	0.210245	0.210245
429	42.9071	23.2565	28.7701	22.135
430	0.2815	3.32328	0	2.93816
431	0	0	0	0
432	8.77773	34.3537	7.08117	34.2912
433	8.33844	6.5559	5.11362	6.28698
434	0.459254	17.5164	0	16.4144
435	24.1209	35.2215	17.7241	35.1436
436	29.5372	29.5372	29.5372	29.5372
437	0	20.8189	0	20.653
438	24.9735	5.25685	11.3223	4.83031
439	27.146	24.8689	24.8689	24.8689
440	0.185333	0	0	0
441	16.8048	0.00560746	11.6704	0
442	0.239509	28.895	0	28.7152
443	0.347073	0	0	0
444	20.0424	10.502	14.8114	10.2277
445	47.5466	47.5054	47.5054	47.5054
446	5.6553	5.6553	5.6553	5.6553
447	0.200174	0.200174	0.200174	0.200174
448	14.2022	3.83295	10.4638	3.7728
449	21.3103	22.3418	14.9285	21.7628
450	27.5204	26.6006	11.8263	26.3753
451	21.5735	29.7943	3.75334	29.584
452	41.2282	8.64198	39.5827	8.46817
453	2.44239	0.419366	0.419366	0.419366
454	15.001	6.2338	9.77706	5.79291
455	7.12808	6.16514	1.37865	5.6872
456	5.46398	10.7642	0.640055	10.7546
457	24.1809	11.3107	5.87874	10.4543
458	13.9778	15.0183	9.82059	14.8383
459	4.93304	22.954	0.989287	22.5629
460	18.9677	11.2027	14.8221	10.1468
461	0.125776	0	0	0
462	12.0764	13.8485	10.3102	13.6812
463	20.5993	17.9157	17.1256	17.8112
464	17.7962	5.33945	15.5075	4.82954
465	0.0612635	0.00560746	0	0
466	23.7038	12.5129	15.442	12.3113
467	31.1898	5.70018	31.0374	5.21046
468	47.3292	4.30217	42.9181	4.29491
469	18.2817	8.05947	13.1482	7.84927
470	0.250883	0.250883	0.250883	0.250883
471	37.5958	36.2684	36.2429	36.2429
472	9.53314	12.0056	5.95928	11.7382
473	27.5086	12.3276	22.0911	11.1165
474	0.909702	6.94032	0.883165	6.9311
475	22.3404	14.8375	21.7405	14.5607
476	1.06375	6.07882	0.773146	5.86043
477	31.8227	2.23903	6.2593	2.13729
478	12.1078	12.0843	11.1455	12.0793
479	14.8377	3.19393	7.99667	2.77681
480	14.184	6.55586	6.19964	6.38373
481	2.77313	0	0	0
482	0.0879726	0.0879726	0.0879726	0.0879726
483	18.3912	0	15.3006	0
484	11.875	5.59104	11.6821	5.50273
485	0.110729	0	0	0
486	21.9982	19.1584	16.8932	19.016
487	11.0282	0	10.5225	0
488	13.6927	13.6927	13.6927	13.6927
489	0.067325	0.067325	0.067325	0.067325
490	16.3647	37.7545	8.77383	37.7291
491	31.6184	15.0148	29.6097	14.6175
492	27.7589	17.59	4.64885	17.2507
493	0.0351468	0.0351468	0.0351468	0.0351468
494	30.8123	7.19814	24.7043	7.19405
495	7.61599	4.75648	6.5175	4.57404
496	0.0342637	0	0	0
497	3.25094	0	2.85739	0
498	19.9639	9.69918	18.2115	9.1833
499	17.8851	6.32924	6.32449	6.32449
500	20.6415	18.9929	10.5765	18.9201
501	42.3591	42.3591	42.3591	42.3591
502	15.3829	8.94944	2.90486	8.73038
503	17.8405	16.8139	11.3268	16.4467
504	21.8195	20.3093	19.4577	20.0897
505	0.0684461	1.55551	0	1.51958
506	8.83246	19.3747	7.48373	19.2242
507	13.8031	0.00560746	8.8169	0
508	0.123964	0	0	0
509	24.6247	19.0407	11.5132	19.0407
510	21.4055	10.8098	0	9.99631
511	7.39116	38.5997	4.87077	38.4534
512	40.7756	0	0	0
513	18.5929	8.17467	14.0217	7.04174
514	14.8487	4.25019	4.24535	4.24535
515	25.6731	25.6731	25.6731	25.6731
516	0	0	0	0
517	15.0254	3.66848	14.4723	3.66491
518	24.4384	18.8113	24.1396	18.4096
519	6.36712	11.3383	2.89169	11.323
520	33.3686	0	24.8325	0
521	0.292663	32.4539	0	32.3591
522	31.4373	0	11.8134	0
523	3.85301	5.94069	0	5.46528
524	12.2302	8.51329	7.91336	8.45062
525	19.2503	1.72032	7.16472	1.38074
526	32.1956	18.2826	30.3043	18.1841
527	32.1648	3.47707	3.47707	3.47707
528	8.26922	2.15574	5.2052	2.11821
529	0.136789	0	0	0
530	16.7217	12.7743	13.4172	12.7563
531	18.9041	0	14.8318	0
532	50.6224	9.34717	0	9.25737
533	34.8256	27.8355	26.1195	27.7865
534	43.7501	43.7501	43.7501	43.7501
535	13.5623	11.9361	10.3107	11.6108
536	22.1358	15.1432	19.2142	15.0561
537	6.56617	0.00560746	0	0
538	10.6105	11.1638	4.3918	11.1638
539	21.6796	0	2.0361	0
540	11.8131	8.65217	11.1928	8.62598
541	29.8562	8.96436	0	8.56317
542	0.111055	13.8536	0	13.6048
543	27.1926	3.26318	0	2.84449
544	0.441829	0	0	0
545	8.2436	17.9389	5.00745	17.7765
546	11.5767	11.9601	5.29823	11.7387
547	12.6069	3.28026	5.96978	3.1587
548	15.6631	5.18389	11.7502	5.05174
549	13.3021	8.15352	0	8.13238
550	20.881	20.881	20.881	20.881
551	21.5238	17.2382	13.9566	17.1952
552	40.6081	5.25467	37.7123	5.2052
553	0.19189	23.6153	0	23.2914
554	15.4291	18.852	0.988966	18.8513
555	7.31599	7.28806	1.81392	7.24697
556	18.6687	5.23256	16.4108	5.12044
557	0.293657	18.7935	0	18.1588
558	16.6278	20.2056	16.5207	19.8189
559	40.7101	16.0494	38.7573	15.7713
560	11.3343	0	4.38664	0
561	0.674727	13.6034	0	13.2527
562	16.2594	6.10895	12.3634	5.25745
563	17.5118	17.9581	17.4647	17.9581
564	20.4674	2.90473	16.6418	2.59917
565	32.4052	6.95222	25.2608	5.69774
566	12.0605	0.00560746	9.53884	0
567	19.2425	0	7.98341	0
568	18.8875	7.44391	0	7.43239
569	20.7746	23.1413	18.2529	23.0909
570	0	6.75292	0	6.71563
571	28.2427	11.2609	21.2332	11.2183
572	21.3914	14.48	21.2513	14.4723
573	16.9052	3.35155	16.5643	3.34633
574	27.3118	27.3118	27.3118	27.3118
575	42.0875	11.2521	23.129	10.8979
576	23.0534	8.62594	20.2225	8.62594
577	37.7023	0	22.2357	0
578	0.0228047	0.0228047	0.0228047	0.0228047
579	28.3309	3.42518	20.2634	3.27047
580	0.836083	20.5556	0	19.6671
581	24.2288	22.8509	24.0311	22.8256
582	17.6104	17.6104	17.6104	17.6104
583	10.8213	21.3926	7.20687	21.3926
584	20.3238	10.2359	12.5479	9.87245
585	30.1753	23.1077	23.1077	23.1077
586	12.8183	11.2047	7.15583	10.9423
587	0.0859346	0.0859346	0.0859346	0.0859346
588	8.92318	6.94564	6.94203	6.94203
589	17.6624	7.14009	15.481	7.1272
590	15.714	2.82285	6.93293	2.75648
591	29.3406	6.28423	25.1262	6.09025
592	34.0015	2.37915	14.332	0.691627
593	12.0415	0.00560746	11.3425	0
594	15.3026	3.84165	11.0564	3.73838
595	19.367	18.1719	18.3799	17.8173
596	21.5869	0	17.6367	0
597	15.3102	9.68713	10.5239	9.57802
598	13.1335	11.5255	10.4709	11.5004
599	31.4079	4.38459	17.0915	4.38459
600	18.2416	11.5795	10.4204	11.1258
601	11.06	10.833	9.62134	10.4304
602	39.4929	39.4393	39.4377	39.4377
603	19.0204	18.9774	18.9774	18.9774
604	17.5283	1.98395	14.8853	1.98395
605	63.25	63.25	63.25	63.25
606	10.7322	17.1084	0	16.756
607	31.7626	31.7626	31.7626	31.7626
608	17.0957	2.63152	4.41763	2.53832
609	13.1411	10.6077	4.14516	10.5746
610	0.00560746	6.2302	0.004562	5.82844
611	16.1922	6.89187	12.3463	6.74725
612	16.5818	6.96248	0.484683	6.93739
613	19.1117	10.2294	16.8117	10.2254
614	19.8637	10.2443	19.7416	10.1378
615	18.5113	0	12.4687	0
616	8.35551	0	7.97568	0
617	14.114	23.4488	12.9838	23.1513
618	5.4097	7.6731	1.32876	7.43669
619	13.7675	1.74359	12.1095	1.66248
620	9.90771	9.90771	9.90771	9.90771
621	19.0763	0.265508	12.2661	0
622	15.8506	13.431	11.9491	13.4086
623	10.99	2.7162	9.80505	2.43725
624	47.1504	5.34522	26.3564	4.72377
625	12.0391	0	0	0
626	4.35043	0	0	0
627	7.36851	13.7333	2.46414	13.6621
628	9.54765	2.13939	6.59143	2.09374
629	19.4891	0.018313	14.1171	0.018313
630	37.5962	11.756	0	11.6921
631	5.60652	0	0	0
632	36.0087	14.2325	0	13.565
633	31.193	3.64832	29.6904	3.64205
634	12.3855	2.76664	1.27873	2.71663
635	13.4838	5.67301	12.0413	5.2643
636	12.9782	23.8605	11.7222	23.8461
637	17.5123	2.24772	13.5182	2.24772
638	6.80125	0	0	0
639	18.9792	13.256	16.9629	13.2353
640	44.4209	25.8024	22.8358	22.6067
641	27.2861	0.0221665	0.0221665	0.0221665
642	32.2443	0	0	0
643	0.42837	11.1397	0	10.9961
644	13.7664	31.343	4.29235	31.1906
645	44.3977	0	0	0
646	39.9337	34.5646	34.5646	34.5646
647	26.2921	21.851	15.8685	21.7426
648	14.0377	14.0377	14.0377	14.0377
649	0	15.5058	0	15.4348
650	30.983	2.37915	28.7643	2.11709
651	13.3187	8.61549	7.0174	8.55602
652	11.1735	8.37891	7.63044	8.30529
653	6.68015	0	2.13896	0
654	13.4299	18.2021	7.93108	18.1385
655	0.0795965	0.0795965	0.0795965	0.0795965
656	14.5246	0	5.23293	0
657	3.90593	3.90593	3.90593	3.90593
658	29.8891	18.6388	0	18.5926
659	78.5757	0.00560746	0	0
660	20.7421	4.21168	17.6577	4.06539
661	17.7812	16.4682	10.04	16.4547
662	16.0089	0	0	0
663	24.6021	7.67337	23.4447	7.67337
664	33.9322	7.53771	0	7.39771
665	28.0976	14.1676	20.5802	13.8577
666	17.7838	10.8986	9.45505	10.4259
667	20.9118	2.60467	17.1536	2.25374
668	0.112472	15.8335	0	15.5868
669	26.5665	18.6078	22.393	18.4428
670	0.0643767	0	0	0
671	28.9959	0.0363713	28.1491	0.00204726
672	17.5362	12.873	15.0008	12.515
673	18.6302	0.320836	9.88459	0.320836
674	7.78204	5.97954	6.75039	5.5615
675	17.6626	5.81196	10.7546	5.59604
676	34.3364	9.85977	4.464	9.41223
677	0	18.0335	0	17.9358
678	37.0904	37.0904	37.0904	37.0904
679	0.075847	0.075847	0.075847	0.075847
680	35.9201	35.9201	35.9201	35.9201
681	0.0434595	0.0434595	0.0434595	0.0434595
682	19.0482	4.96347	17.1235	4.49392
683	0.102303	2.75409	0	2.2551
684	0.71056	0.71056	0.71056	0.71056
685	22.5232	1.48969	15.7519	1.48969
686	15.5672	1.40545	1.40545	1.40545
687	24.2828	17.8677	19.3717	17.3708
688	19.9079	18.4389	15.9175	18.4117
689	13.0584	9.88826	9.88389	9.88389
690	17.7444	10.5467	13.2234	10.2014
691	30.7835	12.9886	22.0236	12.7662
692	0.340465	4.36463	0	4.04422
693	15.7044	4.18725	14.1757	4.18725
694	9.9741	7.12417	0.737013	6.32394
695	19.504	13.2093	0	12.1415
696	18.3012	5.92432	14.5898	5.4938
697	26.6697	27.998	15.8129	27.6989
698	56.8842	22.837	30.8877	22.837
699	9.94597	16.1446	4.12232	15.7243
700	18.4556	8.42986	8.87153	8.06299
701	11.3375	5.54663	10.1756	5.54663
702	28.2686	5.92215	23.9071	5.86464
703	9.11019	7.67636	3.1955	6.72365
704	0.0825545	0	0	0
705	45.4681	12.8887	0	12.0839
706	12.4903	3.54145	7.54849	2.7869
707	23.7395	2.2969	9.06856	2.2969
708	21.743	11.8972	14.951	11.7587
709	9.46236	6.87958	5.44575	6.59252
710	0.158144	12.2244	0	12.0759
711	14.0889	21.0842	6.1148	20.7491
712	16.7619	13.7074	13.5407	13.5623
713	5.39572	0	0	0
714	0	0	0	0
715	12.3567	5.39861	10.1281	5.32804
716	16.6084	3.91821	14.6543	3.87666
717	28.2862	12.547	18.4612	12.5352
718	8.50724	10.1775	5.63517	9.95965
719	17.3575	3.39686	10.7021	3.15563
720	0.168323	0.168323	0.168323	0.168323
721	10.0964	10.0964	10.0964	10.0964
722	29.2622	32.1087	24.3882	31.9335
723	23.244	30.1195	14.983	30.1009
724	15.2224	13.2434	11.6336	13.1232
725	27.0091	27.0077	26.9479	26.9479
726	31.0744	17.5677	27.4703	17.5413
727	0.398776	0.398776	0.398776	0.398776
728	25.474	34.6996	24.7505	34.6385
729	21.4567	8.15456	14.8425	8.03098
730	0.209603	0	0	0
731	9.75825	10.6747	8.2674	10.5756
732	21.7542	21.7542	21.7542	21.7542
733	23.0327	9.1615	20.3209	9.13116
734	21.0608	1.73372	13.0037	1.13834
735	5.71259	20.9328	4.65807	20.5636
736	20.2523	5.92547	12.4965	5.66412
737	23.5119	0.524759	0.524759	0.524759
738	16.8083	0.348774	12.3651	0.33074
739	0.0706076	13.9199	0	13.6349
740	18.2027	13.0236	8.71396	12.6989
741	0.107733	17.7902	0	17.7449
742	32.6927	9.80425	25.3536	9.41338
743	17.5304	18.1849	16.5848	18.1849
744	0	0	0	0
745	17.1756	17.389	12.1118	17.2358
746	14.8968	9.50351	0.287578	9.06793
747	11.1957	13.7116	10.3711	13.5053
748	6.08803	16.1676	6.04794	16.1528
749	37.9001	33.1883	29.7398	31.9367
750	17.4393	7.42129	14.1502	7.42129
751	1.83033	19.7983	1.20964	19.7325
752	39.7236	0	0	0
753	22.6122	14.7043	18.664	14.6543
754	28.5479	28.7223	9.76676	28.7089
755	17.4118	15.3662	14.1223	15.1134
756	3.85719	0	0	0
757	0.734253	24.9291	0	24.9201
758	14.8254	0	6.72068	0
759	10.5358	2.40448	6.26235	2.383
760	8.30737	9.3025	0	9.1865
761	11.1712	8.54863	3.6642	8.05329
762	41.4875	11.2	37.4001	11.2
763	22.77	22.77	22.7683	22.7683
764	10.5801	2.5456	6.0128	2.5456
765	3.48379	3.40632	0	2.99763
766	23.6007	15.4169	5.82855	15.168
767	9.73022	14.8385	6.33668	14.6223
768	32.7762	32.7762	32.7762	32.7762
769	26.8319	0	0	0
770	52.6153	0	0	0
771	11.7982	8.54549	8.03095	8.17071
772	17.756	0	15.2748	0
773	33.965	0	24.9201	0
774	17.8557	11.1423	14.5578	11.0451
775	18.0412	10.1163	10.2285	9.82212
776	3.37452	0	2.19552	0
777	20.3159	7.38002	5.34298	6.44932
778	6.51754	8.0051	0.575048	7.73698
779	25.6039	11.4181	24.1624	10.8063
780	28.089	10.2978	25.4065	10.2937
781	3.45099	10.5974	2.29918	10.4223
782	16.4374	8.67525	9.12095	8.52066
783	0.176524	0.176524	0.176524	0.176524
784	5.22287	0	2.56728	0
785	11.6518	7.58842	5.80461	7.57872
786	27.0589	4.91972	18.5926	4.89818
787	0.022809	10.4885	0	10.2428
788	0.0874671	2.26301	0	2.23542
789	20.0785	10.2891	15.1016	10.1948
790	19.1407	3.38485	15.2133	3.07127
791	9.22052	10.1708	7.83539	9.69609
792	14.5948	16.327	10.6612	16.172
793	18.333	2.22086	13.6507	2.00342
794	17.7146	7.37981	14.0996	7.35405
795	27.2129	27.2129	27.2129	27.2129
796	20.2431	6.90847	12.5788	6.90438
797	0	0	0	0
798	13.1132	15.2024	11.9621	15.1726
799	5.41596	7.42559	0	7.32074
800	0	4.50546	0	4.39157
801	0.00560746	8.06791	0	8.06182
802	22.6159	12.8528	12.8528	12.8528
803	5.29086	0.232731	0	0
804	1.3488	3.65353	0	3.53245
805	17.041	54.0765	14.1681	53.9956
806	22.4116	5.24767	13.0519	5.23293
807	17.925	29.9501	13.7088	29.6464
808	16.9439	7.06022	13.8962	6.95821
809	8.67556	11.127	0	10.4942
810	39.9281	0	21.7341	0
811	23.0593	18.3786	19.6291	18.224
812	24.4019	3.69411	12.6321	3.52391
813	8.3324	11.0048	0	10.976
814	1.00754	2.98833	0	2.8795
815	17.3212	20.5694	12.7168	20.2764
816	17.1301	17.6472	8.03551	17.5188
817	17.5954	38.6431	6.50652	38.601
818	29.7074	6.10749	13.2664	6.10749
819	12.7826	11.5446	7.53693	11.5368
820	0.127162	0	0	0
821	28.3932	13.5088	14.9344	13.4592
822	15.9891	13.964	0	13.8164
823	0.00560746	0.00560746	0.00104546	0.00104546
824	7.97729	14.7947	0	14.3895
825	15.2976	7.30418	12.9737	7.13891
826	15.9819	10.1548	10.6165	10.0069
827	35.3607	18.9045	35.0984	18.7917
828	13.924	2.21964	8.40895	2.09112
829	11.87	10.6582	11.3478	10.2546
830	16.2378	6.45691	9.08033	6.14777
831	21.851	0.00560746	14.79	0
832	18.538	11.6237	15.1045	11.5451
833	24.4954	14.1331	14.1331	14.1331
834	19.4259	9.38668	9.60941	9.06064
835	15.0484	7.37169	11.3988	7.35461
836	24.7693	13.2938	13.2938	13.2938
837	8.88502	4.18959	5.96437	4.18959
838	21.34	9.97034	20.9457	9.97034
839	29.1027	13.3792	22.9044	13.2872
840	8.57771	4.2452	3.60149	3.99695
841	17.9791	17.9791	17.9791	17.9791
842	22.8167	18.9851	17.2683	18.9794
843	18.7523	28.3281	13.2638	28.2775
844	25.7274	1.51648	24.6748	1.44949
845	0.161501	0.161501	0.161501	0.161501
846	0.355487	4.19576	0	4.10681
847	9.28294	19.1112	9.17365	18.9941
848	6.71213	0	0.00104546	0
849	1.40919	0.00560746	0	0
850	18.0156	26.6335	1.64067	24.3347
851	0.165304	0	0	0
852	10.1476	13.6899	9.43821	13.6514
853	29.7396	7.12566	9.281	6.94843
854	13.4025	0.00560746	10.3783	0
855	30.4858	0	0	0
856	6.28199	18.3499	4.86432	18.2963
857	38.0206	6.71661	0	6.68629
858	13.412	10.9393	7.68736	10.9205
859	9.93437	2.45499	7.55962	2.32879
860	0.0793605	0.00560746	0	0
861	19.9341	35.6527	14.7562	35.6361
862	37.81	8.3575	37.7291	7.79173
863	8.74753	4.65328	3.92396	4.64791
864	22.4057	9.14502	10.9019	9.00018
865	34.2095	0	18.052	0
866	15.2907	21.6355	11.503	21.3612
867	10.0036	9.67795	9.61315	9.61315
868	17.4376	7.55393	9.02853	7.5482
869	66.0543	66.0543	66.0543	66.0543
870	6.98977	0	1.3125	0
871	0	0	0	0
872	33.3128	6.15762	0	6.0882
873	27.5904	0.00560746	0	0
874	26.1848	17.6689	20.3303	16.5215
875	21.8265	19.1091	21.4034	18.8723
876	10.8664	9.00537	2.93775	9.00112
877	13.7868	8.07867	1.0578	7.81153
878	5.90647	2.95901	4.90637	2.91725
879	15.5992	0	9.77068	0
880	13.2711	13.2711	13.2711	13.2711
881	3.9421	5.45138	0	4.80824
882	9.73681	0.00560746	4.83251	0
883	15.7735	15.1709	9.53302	15.1525
884	6.06492	6.06492	6.06492	6.06492
885	8.35532	4.00871	3.36832	3.84912
886	23.223	21.2481	12.6135	20.9278
887	7.23589	16.216	5.00874	16.0902
888	0.101684	7.22268	0	7.02777
889	16.3329	15.3461	15.0994	15.2019
890	5.9756	0.00560746	0	0
891	0.691851	9.26808	0.691851	9.01878
892	10.7961	7.36463	8.35291	7.28468
893	28.5225	31.5436	14.9497	31.4704
894	25.5788	0	8.57415	0
895	14.9713	22.3748	0.882537	22.1488
896	13.9323	13.7907	8.606	13.7656
897	16.5923	0	15.1462	0
898	15.7757	7.22279	8.68307	7.22279
899	56.7546	0	2.59917	0
900	0	0	0	0
901	30.7835	6.64226	17.6508	6.61182
902	18.8734	23.394	15.4565	23.3241
903	25.9331	7.52255	24.4826	7.19909
904	19.9497	20.467	11.6148	20.2904
905	9.9836	8.41297	4.96751	8.33351
906	0.759767	6.5146	0	6.50903
907	5.86351	9.49961	3.66491	8.40895
908	15.8283	7.53354	7.53354	7.53354
909	23.4788	22.0608	22.0433	22.0433
910	6.28917	0.438975	1.90869	0
911	34.4327	8.24127	12.4378	8.24127
912	14.498	5.29125	10.668	5.26759
913	33.4223	22.3675	21.4477	21.4477
914	13.9737	5.83893	13.6283	5.3942
915	18.7158	3.80741	11.7418	3.10302
916	18.8656	8.84598	12.0402	7.98119
917	24.2902	0	23.4462	0
918	0.155814	0.155814	0.155814	0.155814
919	55.9388	55.9243	55.9242	55.9242
920	29.5062	34.0368	28.5515	33.9189
921	21.7908	0	0	0
922	27.3251	25.0718	25.0718	25.0718
923	15.9866	9.6533	11.5738	9.48949
924	20.1841	3.06225	3.28611	3.03061
925	2.65131	21.7578	0	21.7341
926	28.8539	3.2464	0	3.24531
927	0.0103656	0.0103656	0.0103656	0.0103656
928	20.1911	15.1131	4.17702	14.7747
929	28.0285	28.0284	27.7713	27.7713
930	8.38198	0.128826	2.6262	0.128826
931	15.9563	13.768	10.282	13.7571
932	17.3271	3.86822	11.3299	3.7245
933	22.8932	22.8932	22.8932	22.8932
934	0.155423	7.29329	0	7.25692
935	8.95302	12.4619	4.02386	11.5543
936	23.7527	22.7677	21.5746	22.525
937	22.1302	0	18.2292	0
938	15.9145	23.0698	14.7257	23.022
939	0.169462	6.48122	0	5.96419
940	0.53773	3.55359	0	3.5158
941	20.2615	0.00560746	7.55268	0
942	3.37004	3.22221	3.21455	3.21455
943	16.5979	21.7776	9.506	21.6508
944	0.210844	6.9012	0	6.43845
945	22.6853	19.7661	16.3469	19.5575
946	25.6286	22.6521	24.2383	22.5283
947	23.9112	1.94096	15.4811	1.88505
948	7.15368	9.85735	2.03243	9.18005
949	16.1219	10.9327	12.3552	10.3975
950	16.66	2.45516	10.19	2.35909
951	0.185896	0.185896	0.185896	0.185896
952	21.5439	10.9506	0	10.9078
953	0.0188675	0.0188675	0.0188675	0.0188675
954	18.5353	2.99751	13.5769	2.99751
955	20.1478	4.49645	14.8759	4.39566
956	44.7952	9.5265	43.0064	9.10655
957	22.3069	10.3805	17.6414	9.34091
958	28.6848	0	22.3944	0
959	14.1706	2.64421	11.4166	2.33244
960	18.0655	12.3296	13.4697	12.1608
961	17.5503	4.18852	15.2505	3.64346
962	8.32476	8.32476	8.32476	8.32476
963	0	6.68004	0	6.45394
964	20.1144	15.4422	19.8862	15.2557
965	15.4482	15.4482	15.4482	15.4482
966	1.08284	0.00560746	0	0
967	2.69158	2.69158	2.69158	2.69158
968	11.611	3.96464	5.69856	3.73449
969	35.3211	35.3158	35.3158	35.3158
970	0.15237	0.15237	0.15237	0.15237
971	0.519511	0	0	0
972	29.3304	0	26.9713	0
973	26.7203	1.03229	12.1664	0
974	16.9471	2.62007	8.26463	2.50451
975	5.9241	25.1076	5.09733	25.0983
976	10.2861	0.277445	0.277445	0.277445
977	17.962	18.1428	17.9169	18.1428
978	35.2356	19.8415	35.1436	19.7416
979	17.6591	7.33508	13.432	7.25325
980	0.186931	0	0	0
981	18.1137	10.7861	16.2441	10.6377
982	0.097945	0	0	0
983	0.100365	10.7606	0	10.2006
984	0.0227987	0	0	0
985	18.6302	6.22041	13.386	6.1444
986	23.4727	26.9245	18.3889	26.92
987	16.0896	14.8783	13.624	14.5329
988	0.0553444	2.77728	0	2.37735
989	25.5171	10.349	21.0808	9.77872
990	4.55359	11.7989	3.24659	11.6562
991	17.9041	15.8733	13.8023	15.8023
992	13.6731	3.87909	8.76658	3.87909
993	13.3984	5.79272	9.23064	5.79272
994	16.2808	28.9841	12.8765	28.3642
995	42.7204	7.72447	35.3498	7.38139
996	0	0	0	0
997	21.7672	29.9761	14.5027	29.9761
998	25.6796	1.94383	11.6779	1.94383
999	20.9135	0.269839	17.1892	0
1000	0	16.9441	0	16.7906
1001	90.8761	90.8761	90.8761	90.8761
1002	3.17847	0.00560746	3.09349	0
1003	0.0345254	0.0345254	0.0345254	0.0345254
1004	36.2272	37.4742	36.0854	37.3404
1005	0.12606	0.12606	0.12606	0.12606
1006	20.294	11.5192	16.0264	11.5192
1007	15.3839	14.5542	10.5592	13.932
1008	9.73955	7.21476	7.72365	6.83641
1009	17.6744	17.1293	16.7141	16.7141
1010	15.5174	1.5194	1.5194	1.5194
1011	0.164529	0	0	0
1012	0.0333434	20.6408	0	20.103
1013	8.4122	5.21858	5.21858	5.21858
1014	16.4576	5.31256	16.2556	5.30867
1015	0.0202411	13.419	0	13.3419
1016	7.52893	3.8346	4.49793	3.8346
1017	10.552	0	7.339	0
1018	23.4911	23.4911	23.4911	23.4911
1019	12.7005	20.2909	7.1952	19.9073
1020	19.8035	0.279306	1.77518	0
1021	58.6809	52.9201	52.9189	52.9189
1022	18.8692	12.0158	11.8874	11.1724
1023	54.922	0.00560746	47.7444	0
1024	0.0311594	0.0311594	0.0311594	0.0311594
1025	9.69005	0	0	0
1026	16.048	8.95413	14.0159	8.95413
1027	0	11.8036	0	10.6095
1028	2.09238	20.7397	0	20.7069
1029	14.0715	26.9188	11.1912	26.751
1030	17.6244	11.5835	11.6246	11.5811
1031	1.71463	0.00560746	0	0
1032	43.4349	35.5235	31.0096	35.4698
1033	18.5059	0	11.7821	0
1034	17.4804	28.2561	15.9493	27.3768
1035	12.3152	13.2954	0.0890404	12.9362
1036	9.7816	0	6.35504	0
1037	32.3359	10.4206	31.7056	10.175
1038	24.8866	19.6896	19.6857	19.6857
1039	11.2666	0.744409	7.39824	0.554123
1040	25.6258	25.6258	25.6258	25.6258
1041	30.1049	18.3021	0	18.0074
1042	15.0258	6.29509	9.21142	6.22245
1043	15.5918	8.67395	12.7978	8.03698
1044	74.0537	10.2628	0	9.92899
1045	17.3374	15.4191	13.9415	15.3714
1046	16.5656	4.3837	10.9214	4.3837
1047	20.8151	17.5851	15.3005	17.4302
1048	13.5028	13.5028	13.5028	13.5028
1049	50.3563	50.3563	50.3563	50.3563
1050	20.2241	20.222	20.2082	20.2082
1051	18.4974	39.5144	10.703	39.4631
1052	26.0048	23.9904	22.9772	22.9772
1053	30.7337	0	4.19015	0
1054	14.7005	10.0516	6.80483	10.0431
1055	23.4184	11.7798	0	11.5302
1056	15.4291	17.3898	12.8142	16.9199
1057	0.00895549	21.9716	0	21.9395
1058	0.00560746	0.00560746	0.00351654	0.00351654
1059	18.2669	20.7265	13.0025	20.6991
1060	24.9241	10.2284	19.0825	9.61132
1061	12.9046	8.44186	3.70685	8.41554
1062	0.0443377	0	0	0
1063	13.4363	40.7762	0.408204	40.569
1064	85.0928	0	0	0
1065	6.36486	30.7659	2.76393	30.5212
1066	0.00978469	7.97093	0	7.93608
1067	22.9793	29.9827	16.8349	29.501
1068	0	0	0	0
1069	48.9901	0	0	0
1070	0.0590164	0.0590164	0.0590164	0.0590164
1071	33.7135	18.1337	0.312347	18.1188
1072	35.662	12.0953	0	11.7468
1073	4.40669	0.00560746	3.43462	0
1074	46.5816	41.6294	41.6279	41.6279
1075	22.1861	22.1861	22.1861	22.1861
1076	21.4904	3.20008	18.309	3.19561
1077	0	0	0	0
1078	0.334974	0.334974	0.334974	0.334974
1079	4.07154	4.07154	4.07154	4.07154
1080	6.70792	6.70792	6.70792	6.70792
1081	32.8775	0.649374	0	0.530296
1082	23.2625	18.6874	18.4433	18.6698
1083	33.8758	11.5413	13.3594	11.2551
1084	0.0631952	0	0	0
1085	0.0225177	38.4841	0	38.4117
1086	2.53862	7.99525	0.909118	7.7245
1087	4.87923	4.87923	4.87923	4.87923
1088	16.4153	0.00560746	11.6288	0
1089	0.0345853	0.0345853	0.0345853	0.0345853
1090	12.0714	0	0	0
1091	0.160071	0.160071	0.160071	0.160071
1092	18.7218	15.6869	16.9718	15.5597
1093	18.1951	23.6745	12.3519	22.9019
1094	7.07295	7.07295	7.07295	7.07295
1095	0.0432646	1.47302	0	1.42185
1096	0.0367476	0	0	0
1097	22.7665	0.0564499	21.5538	0.0564499
1098	15.1468	7.69182	12.5052	7.08463
1099	18.99	18.5697	12.267	17.4943
1100	7.21456	23.4609	1.25004	23.4462
1101	22.4649	10.9773	16.816	10.9773
1102	26.73	0	10.9651	0
1103	26.2033	25.9399	13.3369	25.7459
1104	11.5179	20.6111	1.88505	17.7419
1105	20.3822	5.26443	14.2646	5.26443
1106	18.3181	6.17921	6.17455	6.17455
1107	17.6569	16.3703	10.9311	15.9459
1108	19.0694	3.36076	15.9962	2.87032
1109	37.259	17.3439	37.1197	16.4492
1110	28.4212	40.7914	23.5547	40.7683
1111	6.99084	9.72444	3.03386	9.65238
1112	36.0575	43.5141	31.1734	43.3801
1113	16.7234	39.3459	11.5723	39.0878
1114	7.21146	0	0	0
1115	3.7145	10.4217	0	10.2266
1116	51.8649	0	0	0
1117	8.23363	10.9554	0	10.3503
1118	9.14775	5.70233	8.06182	5.5685
1119	3.28395	3.28395	3.28395	3.28395
1120	22.2419	17.7078	11.0909	17.6825
1121	11.0063	9.75896	9.17711	8.82144
1122	13.1475	12.9614	7.29932	12.1666
1123	3.23394	5.46904	0.562962	5.40187
1124	0.0409797	2.74137	0	2.70099
1125	13.1479	4.03611	10.0743	3.81261
1126	18.0797	13.6641	17.437	13.0728
1127	0	27.8531	0	27.8123
1128	20.1777	15.0168	19.7325	13.3311
1129	25.3323	7.89814	22.5126	7.52
1130	32.5034	17.4854	31.5454	17.4854
1131	26.5815	0	19.215	0
1132	8.21417	7.25171	7.98608	6.86699
1133	24.7041	13.3216	11.8416	13.164
1134	16.4024	12.1982	14.3434	12.1324
1135	0.346293	12.4077	0.342397	12.3752
1136	29.3071	13.2989	28.3002	13.0898
1137	19.0401	19.2958	7.50969	19.0748
1138	20.1149	5.67482	0	5.58787
1139	18.2561	0	0	0
1140	23.0229	5.20298	21.8707	5.10757
1141	35.64	27.8655	28.678	27.8655
1142	20.9655	12.7149	19.0875	12.0988
1143	33.4548	2.08162	15.9593	2.08162
1144	0.0530586	8.60968	0	8.45119
1145	24.3908	0	14.6207	0
1146	11.88	10.6923	11.7191	10.6923
1147	1.27917	14.0243	0	13.8482
1148	15.9988	19.7446	14.0476	19.7446
1149	20.7439	14.1509	17.8963	14.1355
1150	0.0094048	0	0	0
1151	13.1547	12.9724	13.0464	12.8759
1152	27.2514	0.985094	26.8668	0.969917
1153	18.458	3.17769	13.1045	3.17769
1154	20.944	5.59899	18.6077	5.30132
1155	31.279	2.40021	2.43723	2.10822
1156	18.5547	9.00964	2.90846	8.86017
1157	17.214	17.0156	13.0395	16.9097
1158	8.57676	7.8216	6.09031	7.54185
1159	27.2589	11.9263	22.3806	11.9263
1160	0	0	0	0
1161	13.5227	11.9163	7.948	11.0244
1162	4.22845	4.45581	0.416413	4.44897
1163	7.39961	7.68592	0	7.53949
1164	19.2134	5.93224	9.68814	5.91429
1165	45.7109	14.6523	42.8251	14.6207
1166	10.312	12.0899	1.35624	12.0174
1167	24.4594	0.00560746	18.9815	0
1168	22.5489	9.75961	17.741	9.5931
1169	25.2692	22.4259	19.0049	21.1562
1170	0	0	0	0
1171	6.31358	13.3187	1.38074	12.1324
1172	20.3435	14.22	1.99974	14.1246
1173	9.88675	6.47936	3.26587	6.23753
1174	3.97937	9.66015	3.72955	9.57782
1175	39.0792	33.6905	38.491	33.6886
1176	4.0864	0	0	0
1177	15.1115	30.1603	13.4543	29.9198
1178	28.714	13.7667	16.9825	12.5346
1179	6.44522	0	5.19221	0
1180	8.94618	12.2212	4.1664	12.072
1181	13.0209	17.3979	7.35864	16.8034
1182	0.0525277	24.7473	0	23.6745
1183	13.4687	0.543663	9.54776	0.543663
1184	17.9002	0	15.0878	0
1185	20.8257	6.84799	14.9875	6.84799
1186	15.9716	15.9716	15.9716	15.9716
1187	28.2524	28.2524	28.2524	28.2524
1188	21.7727	20.9475	20.4841	20.4841
1189	0.343166	17.3566	0	17.0079
1190	22.0878	21.3912	21.9478	21.3912
1191	11.4512	5.00078	6.15416	4.73713
1192	20.8117	26.0738	19.5575	26
1193	14.4338	21.6348	7.81402	21.3822
1194	13.763	12.9687	7.35057	12.9408
1195	6.82917	0	0	0
1196	6.2649	0.00560746	0	0
1197	41.3442	9.87292	38.0979	8.88812
1198	50.796	40.1648	40.1648	40.1648
1199	12.6046	3.76706	3.45753	3.45753
1200	10.9619	0	3.23831	0
1201	18.4609	27.9366	14.8093	27.757
1202	34.3759	8.3504	13.0742	8.3504
1203	13.5259	25.4038	1.00534	24.961
1204	17.8597	16.2111	14.9358	16.1075
1205	18.7431	8.5433	14.7543	8.49008
1206	13.9403	0.31386	7.15057	0.308347
1207	0.699567	10.3774	0	10.2394
1208	19.3565	5.47496	16.6108	4.77177
1209	21.8671	8.80387	14.6277	8.43316
1210	14.54	17.4264	12.2237	17.3525
1211	13.7867	26.6661	8.11348	26.5004
1212	3.65022	8.36417	0	7.79441
1213	1.17984	3.85875	0	3.00552
1214	18.4758	31.5722	6.59961	28.994
1215	14.8245	17.7104	8.0371	17.4678
1216	18.3742	10.5588	7.28824	10.2648
1217	15.0774	6.3831	10.9078	6.1996
1218	3.36099	0.00560746	0.0143371	0
1219	18.885	18.5387	13.5648	18.4185
1220	17.0296	17.0296	17.0296	17.0296
1221	11.7705	0.0928131	5.7237	0.0896767
1222	0	0	0	0
1223	9.55546	10.0942	4.24381	9.16771
1224	13.3274	13.3274	13.3274	13.3274
1225	15.7709	8.83469	10.4696	8.62801
1226	0.221381	2.79811	0	2.73838
1227	12.8884	0	5.65029	0
1228	18.0559	1.70755	17.8604	1.70755
1229	11.1374	9.47152	5.25685	9.12631
1230	11.5862	12.1761	8.69402	11.5805
1231	18.9794	9.25887	9.24323	9.24323
1232	7.78021	0	7.25325	0
1233	52.5556	9.94492	41.8562	9.90798
1234	21.6003	3.2009	12.3718	3.05865
1235	0	0	0	0
1236	17.6062	0	9.78531	0
1237	10.5285	13.5426	3.54849	13.2141
1238	5.3993	5.3993	5.3993	5.3993
1239	31.7553	4.64717	19.0094	4.52472
1240	21.0244	0.826361	0	0.76551
1241	14.8131	7.99709	12.0601	7.53254
1242	21.2592	7.45746	20.8916	7.15886
1243	47.794	30.1254	25.2239	30.0263
1244	29.5084	5.0587	25.361	4.87079
1245	12.5591	7.6472	5.22354	7.33466
1246	31.5099	4.48843	15.9396	4.24508
1247	12.8956	16.3372	9.21746	15.9637
1248	30.544	0	14.4029	0
1249	12.8117	4.1239	8.74283	3.70864
1250	12.8508	8.52894	5.24604	7.9759
1251	15.4944	10.2048	7.88228	10.1642
1252	13.8552	18.0289	13.6857	18.0289
1253	1.50677	59.7818	1.03264	59.7655
1254	19.5092	19.5092	19.5092	19.5092
1255	8.65068	10.5982	4.77739	10.3753
1256	0.0352463	0	0	0
1257	59.8192	6.00136	59.7655	5.75754
1258	60.4515	54.6489	53.7904	53.7904
1259	34.6194	0	19.6707	0
1260	7.81482	7.81482	7.81482	7.81482
1261	6.25567	10.6968	5.86763	9.97058
1262	9.62633	1.36672	9.44755	1.36672
1263	14.9442	14.9442	14.9442	14.9442
1264	0.00560746	0.00560746	0.002281	0.002281
1265	8.26356	2.29516	1.56293	2.22586
1266	6.84799	0.383238	0	0.287578
1267	15.9173	13.7379	13.7353	13.7353
1268	17.061	17.061	17.061	17.061
1269	26.3567	26.3567	26.3567	26.3567
1270	17.702	7.65249	13.5761	7.65249
1271	13.8136	8.38288	6.18008	6.84639
1272	11.0439	41.505	2.08648	41.4256
1273	14.3906	11.3895	11.7244	11.3734
1274	38.4963	15.3475	34.6236	15.3475
1275	25.0218	21.0223	21.0217	21.0217
1276	20.4307	4.94742	17.9376	4.94333
1277	16.4427	3.59533	3.59533	3.59533
1278	8.08474	9.02894	1.62887	8.7106
1279	23.3782	8.41898	17.8088	8.39657
1280	8.21615	0	0	0
1281	10.8006	17.3124	0	16.7919
1282	11.9799	15.3915	10.0674	15.1949
1283	19.6627	8.29666	12.3818	8.09384
1284	7.21888	5.56492	3.9484	5.09614
1285	22.2772	19.8823	11.1251	19.8439
1286	11.5869	4.32772	0	4.26184
1287	28.3191	8.6374	0	8.54323
1288	29.6603	4.03181	11.9801	4.03181
1289	34.4842	21.3651	21.3651	21.3651
1290	24.7157	12.1943	20.1174	12.1943
1291	0.626813	8.20114	0	7.97568
1292	0.115041	2.95632	0	2.44613
1293	19.4986	6.96408	6.71544	6.92891
1294	14.1517	5.30189	9.06568	5.18565
1295	11.2591	11.2591	11.2591	11.2591
1296	27.9759	9.54959	0	9.52793
1297	14.1008	2.0941	2.51594	2.0941
1298	19.3338	2.62006	14.5949	2.34064
1299	9.84437	10.3592	0	9.02398
1300	0	11.1587	0	11.0957
1301	24.4139	44.064	22.8446	43.7362
1302	36.1542	33.3751	22.7464	33.2347
1303	10.4305	10.4305	10.4305	10.4305
1304	9.96165	11.3014	8.96737	10.4827
1305	38.865	38.865	38.865	38.865
1306	0.0252598	0	0	0
1307	30.683	0	29.7348	0
1308	16.8516	0	11.1361	0
1309	3.7664	7.81559	2.09322	7.339
1310	10.1776	29.9627	6.70371	29.9127
1311	53.9999	24.3061	46.2456	24.3061
1312	11.4026	14.8433	10.1341	14.3706
1313	25.5239	6.17544	24.4325	6.13196
1314	26.1023	5.21975	16.8558	5.20404
1315	8.49935	18.2073	5.19725	18.1803
1316	0.222862	1.38727	0	1.09253
1317	9.48885	4.88583	4.50039	4.53071
1318	4.31862	14.2275	3.53608	14.1648
1319	13.5523	9.07835	10.0087	9.03014
1320	14.7322	11.105	12.4057	10.9353
1321	46.4271	51.8433	9.38119	51.6844
1322	10.0359	8.16141	8.34115	7.93909
1323	18.1884	6.83974	0	6.53384
1324	24.2349	17.1233	19.6885	16.92
1325	3.80336	8.32322	1.5798	7.93683
1326	11.4432	9.94956	6.32848	9.83677
1327	5.32278	5.32278	5.32278	5.32278
1328	9.74151	0.00560746	0	0
1329	0	2.86388	0	2.82007
1330	67.3034	67.3034	67.3034	67.3034
1331	22.373	8.06433	13.404	7.55494
1332	5.46399	5.46399	5.46399	5.46399
1333	24.9423	7.90264	7.89865	7.89865
1334	15.5355	0	11.5743	0
1335	19.1203	13.7782	12.7449	13.6308
1336	0.505251	5.26548	0	4.15201
1337	15.6833	12.2303	8.21804	12.2261
1338	8.82096	26.5231	4.32422	26.2707
1339	0.473662	8.01657	0	7.06626
1340	19.8863	19.1037	7.32888	18.8668
1341	9.31313	7.09999	4.33635	6.90569
1342	18.0204	0.00560746	14.356	0
1343	50.5152	42.3458	42.3458	42.3458
1344	14.4792	11.6041	11.1607	11.4844
1345	21.9276	8.42722	12.1014	8.14076
1346	16.4921	17.7954	15.596	17.7954
1347	23.6966	23.6966	23.6966	23.6966
1348	12.2232	14.6485	1.19673	14.1974
1349	0.218718	0.218718	0.218718	0.218718
1350	3.03815	24.3408	2.18374	24.2606
1351	9.05583	7.93551	7.93551	7.93551
1352	0.00560746	0.00560746	0.00370662	0.00370662
1353	22.9569	0	1.19387	0
1354	15.0102	0.00560746	4.10538	0
1355	9.78342	0	6.62537	0
1356	19.8806	19.0734	18.5516	19.0363
1357	14.7354	6.28288	7.56296	6.18182
1358	25.587	1.86185	17.9191	1.86185
1359	18.3997	18.3997	18.3901	18.3901
1360	16.5733	17.7767	12.6886	16.8235
1361	44.2554	4.90395	43.9608	4.90395
1362	12.104	3.21278	10.1378	2.76323
1363	27.5438	10.5206	11.1974	10.5206
1364	158.56	16.0349	54.7516	16.0299
1365	0.00560746	0.00560746	0.00560746	0.00560746
1366	2.19805	2.19805	2.19805	2.19805
1367	22.5401	7.5207	12.5471	7.4954
1368	18.4543	10.528	14.6929	10.1519
1369	14.7779	17.0652	12.1629	17.0642
1370	6.46495	20.9963	0	20.9702
1371	10.2255	0	7.28468	0
1372	12.6827	3.67743	6.77401	3.67743
1373	35.8149	3.85274	35.6361	3.52955
1374	12.7546	6.20569	0	6.19751
1375	49.7862	0	38.601	0
1376	19.7041	13.4034	16.3306	13.351
1377	24.3451	2.90599	18.8206	2.58298
1378	10.0494	10.0494	10.0462	10.0462
1379	29.7572	24.3998	0	24.1936
1380	12.5334	15.1371	1.39732	14.3915
1381	19.8762	19.6113	18.9719	18.9719
1382	16.5036	1.46322	16.0855	1.46322
1383	0.14347	0.14347	0.14347	0.14347
1384	16.2811	8.82967	10.4817	8.50684
1385	13.446	13.867	11.4332	13.6743
1386	14.8789	0.00560746	0	0
1387	11.6425	0.00560746	10.3929	0
1388	22.7197	12.372	20.4797	12.3622
1389	6.3211	8.77873	3.64346	8.61405
1390	18.6429	0.00560746	0.530296	0
1391	13.4768	5.25763	7.78493	4.70919
1392	12.1903	9.96999	7.68839	9.7275
1393	14.9812	0.401613	9.85414	0
1394	17.0095	0	15.0924	0
1395	11.2043	5.90957	7.66199	5.79112
1396	9.24614	9.91306	4.05771	9.86677
1397	18.0942	18.0942	18.0942	18.0942
1398	3.79931	5.61867	3.68558	5.57618
1399	15.7615	0.00560746	6.50844	0
1400	9.73749	9.73749	9.73749	9.73749
1401	10.1215	17.1823	8.89772	16.1663
1402	20.0208	6.38474	17.095	6.09792
1403	0.211595	0	0	0
1404	19.4198	12.9113	9.97154	12.8496
1405	5.51806	6.50233	1.16311	6.38716
1406	36.6196	36.2513	34.8172	36.2296
1407	11.2129	5.17507	10.4289	5.16114
1408	33.2336	0	29.3534	0
1409	12.7643	11.8814	5.13296	11.3481
1410	10.9867	0.470835	0.128295	0.289757
1411	0.0661172	0.0661172	0.0661172	0.0661172
1412	13.2876	29.7878	9.69428	29.6858
1413	19.0682	9.94407	12.2168	9.46762
1414	31.6547	8.49925	30.9035	8.13584
1415	13.2506	9.45672	9.419	9.419
1416	10.3105	1.68091	5.28566	1.67578
1417	16.5058	16.5058	16.5058	16.5058
1418	34.237	0	27.1668	0
1419	18.2825	0	10.3387	0
1420	24.8873	11.3212	15.0028	11.3212
1421	25.726	9.41533	10.3197	9.39153
1422	26.6508	3.89685	5.12765	3.87817
1423	23.5726	5.46063	0	5.07115
1424	14.5199	17.7272	13.2022	17.6475
1425	9.44217	0	2.13729	0
1426	6.11971	7.02911	0	6.78362
1427	14.0293	0.00560746	3.71006	0
1428	9.10187	15.5594	0	14.5228
1429	16.2095	10.338	10.0467	9.97154
1430	27.4975	12.2002	8.99488	11.8895
1431	38.2188	52.2533	37.8068	52.2533
1432	19.9982	0	13.2469	0
1433	0	15.213	0	15.1603
1434	5.02136	0.0436217	0	0
1435	0.820124	4.16648	0	4.09315
1436	12.2021	12.4845	7.5678	12.2309
1437	0	0	0	0
1438	25.1348	13.4487	14.9042	13.2413
1439	24.8953	42.9286	17.3563	42.8251
1440	12.8299	8.14696	11.5708	7.69157
1441	20.7954	11.6296	19.07	11.5914
1442	0.959998	4.50355	0	4.26514
1443	27.8446	41.6343	17.5647	41.1264
1444	0.00560746	0.00560746	0	0
1445	10.7265	7.23377	7.23377	7.23377
1446	46.0806	8.76064	15.375	8.75449
1447	14.9867	14.821	14.8208	14.8208
1448	16.9171	7.24523	13.8566	7.12815
1449	29.5774	47.0011	19.0573	46.9566
1450	5.63879	2.75685	4.70166	2.75685
1451	35.8227	12.1332	29.04	12.0722
1452	14.2748	0.326206	11.4422	0.3045
1453	18.258	13.0264	7.06367	12.6705
1454	19.4631	0.00560746	19.3455	0
1455	16.6946	0	11.0752	0
1456	30.2107	6.54544	28.1609	6.53423
1457	0.249689	0.00560746	0	0
1458	2.22628	2.22628	2.22628	2.22628
1459	16.0094	7.07973	13.9675	7.04712
1460	38.0999	30.0322	23.4849	29.8227
1461	17.2141	6.07036	6.07036	6.07036
1462	9.91588	4.06216	3.82798	3.81278
1463	20.0213	23.7709	19.4999	23.707
1464	56.8728	56.8728	56.8728	56.8728
1465	0.852642	0.00560746	0	0
1466	18.465	17.7997	18.1588	17.6305
1467	12.8962	13.455	11.5197	13.3589
1468	16.7158	6.85048	13.2153	6.84193
1469	6.6685	1.75797	0	1.75561
1470	17.4883	14.546	6.5192	14.4424
1471	18.1272	11.4295	12.186	11.3961
1472	22.2128	29.3402	22.0113	29.3402
1473	0.79566	4.07958	0	4.00404
1474	0.72204	0.72204	0.72204	0.72204
1475	3.92478	3.92478	3.92478	3.92478
1476	22.9947	15.1912	18.9472	14.5171
1477	0.521175	0	0	0
1478	28.6541	22.78	6.63348	22.3236
1479	16.3918	16.3918	16.3918	16.3918
1480	16.8904	10.6808	15.8046	10.4084
1481	41.7765	0.57061	31.16	0.510554
1482	2.32442	11.7295	1.62224	11.6904
1483	18.7708	9.27062	0	9.10948
1484	16.4896	7.24477	9.77132	7.23191
1485	23.6784	11.4592	17.695	11.4412
1486	23.6633	19.5309	18.4132	19.193
1487	19.5183	17.2631	9.75728	17.1495
1488	22.9073	27.1914	17.4679	27.0738
1489	16.2598	19.7056	8.01306	19.7056
1490	14.5382	12.9826	12.8917	12.5557
1491	0	10.6819	0	10.6175
1492	15.8949	15.8949	15.8949	15.8949
1493	11.7077	1.37589	5.12325	1.37589
1494	45.1753	25.6167	44.3583	25.4958
1495	0	27.4913	0	27.4913
1496	19.4776	10.4644	10.4644	10.4644
1497	22.1279	4.36932	4.43566	4.3577
1498	14.9148	17.6561	8.41893	17.4888
1499	13.0019	13.292	11.4925	12.873
1500	22.6722	3.10916	20.7069	3.09349
1501	16.8102	0.0971282	13.538	0.0200117
1502	26.1782	26.164	25.976	25.976
1503	12.8405	12.4854	11.842	11.9432
1504	19.8876	7.72204	9.14276	7.72204
1505	3.35242	0.00560746	1.37827	0
1506	14.9739	19.2775	7.72237	19.2062
1507	29.1019	11.1829	26.7828	11.1829
1508	28.8349	9.32317	22.6412	9.14383
1509	19.3319	16.9526	17.0732	16.6093
1510	0	2.61696	0	2.32644
1511	14.5734	0.0101022	9.20878	0.0101022
1512	0.23872	2.24921	0	1.2773
1513	2.47834	2.41846	2.41846	2.41846
1514	1.79433	1.79433	1.79433	1.79433
1515	0.078833	0	0	0
1516	11.2581	7.58558	5.45274	7.4774
1517	3.25972	3.25972	3.25972	3.25972
1518	11.0941	6.15914	7.32996	6.11223
1519	4.83195	11.7946	0	11.6684
1520	1.93097	0	0	0
1521	20.1109	0	0	0
1522	13.8455	7.42111	12.8289	7.41659
1523	7.30458	7.30458	7.30458	7.30458
1524	0.203001	4.39417	0	4.33919
1525	21.7888	10.75	17.2869	10.1124
1526	0.506859	0.506859	0.506859	0.506859
1527	15.5796	0.721311	0.721311	0.721311
1528	6.18622	6.18622	6.18622	6.18622
1529	17.6726	12.9637	11.2705	12.866
1530	0.220506	0	0	0
1531	23.917	11.1195	20.0922	10.9519
1532	25.8522	13.72	24.2767	13.6675
1533	14.1321	11.4975	9.96739	11.1021
1534	13.2591	7.37252	5.29082	7.12117
1535	18.6078	0.120811	7.79377	0.115298
1536	12.9239	11.7827	5.83985	11.5499
1537	20.1387	21.1477	10.5449	20.7667
1538	29.0334	3.54722	28.7174	3.5363
1539	20.3492	13.4837	16.8697	13.4158
1540	0	7.51122	0	7.51122
1541	35.3716	13.1708	32.0191	13.0317
1542	10.3472	7.83105	6.84001	7.29942
1543	26.9196	4.57958	26.751	4.53419
1544	13.1783	9.86381	11.8854	9.70281
1545	0.193139	0.744084	0.193139	0.744084
1546	19.2591	12.0747	11.7025	12.0259
1547	36.9081	0.00560746	35.088	0
1548	15.2395	0	0	0
1549	12.2787	4.01755	7.53477	4.01755
1550	5.86344	21.2638	1.96208	21.2513
1551	17.0305	24.6197	12.365	24.2383
1552	12.0201	1.40257	2.62986	1.3943
1553	26.9016	26.9016	26.9016	26.9016
1554	21.2275	20.542	9.98106	20.5345
1555	14.0089	10.4791	9.90271	10.4329
1556	7.17518	11.3118	0	11.0436
1557	8.80124	14.8364	3.96341	14.6161
1558	13.0617	0.00560746	5.05601	0
1559	18.9726	9.19314	13.7465	9.19314
1560	9.80079	4.63388	9.2459	4.63388
1561	26.1161	17.2485	23.9612	17.2043
1562	18.3519	18.3519	18.3519	18.3519
1563	21.1416	5.86152	17.0079	5.54923
1564	3.48212	14.5709	1.70788	14.1325
1565	13.7834	28.5948	4.70963	28.4767
1566	4.53152	4.0548	0.0742417	3.68377
1567	18.6523	10.0557	7.10374	9.80761
1568	0.359765	0.0742289	0.0742289	0.0742289
1569	21.7656	16.7481	21.4943	15.2372
1570	27.2538	7.87146	22.4197	7.67259
1571	14.1765	25.8047	5.23209	25.8047
1572	28.006	0	23.4761	0
1573	19.4269	19.3065	19.2861	19.2861
1574	24.7149	3.97218	16.4998	3.74774
1575	10.747	9.44796	3.93757	9.09791
1576	17.5805	0	15.4221	0
1577	8.62087	0	4.30832	0
1578	10.314	5.11188	3.397	4.95628
1579	0.315747	12.9376	0	12.0488
1580	3.8582	8.96186	0	7.65326
1581	18.4018	20.5903	16.6327	20.5268
1582	2.29944	7.80563	0	7.60508
1583	27.7305	8.1099	23.2676	7.30536
1584	2.96441	0.00560746	0	0
1585	2.30118	2.30118	2.30118	2.30118
1586	20.6758	15.6479	16.6271	14.4826
1587	4.06866	1.8703	1.8703	1.8703
1588	20.1924	3.80624	16.0849	3.50614
1589	21.5475	25.4353	21.3199	25.4253
1590	39.0383	7.10156	0	6.63515
1591	1.09942	29.5409	0	29.3776
1592	13.2041	9.90803	6.66921	8.92251
1593	25.2574	5.75624	17.3019	5.02903
1594	6.19565	0	1.82896	0
1595	12.4809	2.68927	3.40407	2.68927
1596	14.9063	15.1393	11.3431	14.8521
1597	20.8834	11.2405	8.89913	11.1906
1598	22.5522	18.7601	19.2504	18.6479
1599	12.923	21.5888	7.55884	21.3738
1600	55.7496	55.7496	55.7496	55.7496
1601	32.5906	32.5906	32.5906	32.5906
1602	0.160459	8.2223	0	8.15623
1603	73.1256	73.1256	73.1256	73.1256
1604	25.5373	14.8972	20.3921	14.87
1605	29.4275	29.4275	29.4275	29.4275
1606	11.6014	2.77308	6.71218	2.76393
1607	0.168831	0.168831	0.168831	0.168831
1608	21.7895	0.590719	19.8064	0.590719
1609	15.0049	1.22596	9.86904	1.10032
1610	1.17287	1.9623	0.235427	1.53122
1611	14.2248	2.26633	5.5917	2.20799
1612	26.0682	10.5995	18.2073	10.4854
1613	10.53	17.3589	0	17.0371
1614	22.7472	22.7472	22.7472	22.7472
1615	12.6214	10.3989	12.5352	10.3989
1616	21.147	20.391	20.391	20.391
1617	9.44445	13.262	2.1536	13.1629
1618	4.14808	22.115	3.77612	22.0544
1619	24.1316	12.2661	21.0055	12.0456
1620	11.5204	1.21118	4.8802	1.21118
1621	32.2266	0	30.0254	0
1622	33.6037	10.1013	30.8365	10.0973
1623	12.6275	13.1654	6.19741	12.5104
1624	1.27782	0	0	0
1625	20.1624	7.72846	17.4487	7.16132
1626	24.6155	25.4511	24.4689	25.443
1627	25.4676	12.1198	25.3085	11.6735
1628	12.2993	10.4182	6.05415	10.3463
1629	0.454656	0.454656	0.454656	0.454656
1630	17.5132	9.48926	0	9.281
1631	27.8165	17.3044	23.1764	17.2951
1632	15.8615	14.6085	10.6632	14.1651
1633	19.5543	0.603906	13.8757	0.471001
1634	17.3421	5.51458	11.7415	5.41548
1635	10.099	10.099	10.099	10.099
1636	13.9019	2.41852	11.6684	2.32134
1637	0.327314	0.327314	0.327314	0.327314
1638	33.8333	33.8333	33.8333	33.8333
1639	18.3763	0.709119	14.4167	0
1640	1.03929	23.6949	0	23.5424
1641	0.081588	3.83492	0	3.65112
1642	38.2829	7.76992	36.6492	7.74218
1643	13.5924	0	12.9831	0
1644	5.76024	5.76024	5.76024	5.76024
1645	15.6045	0	6.95754	0
1646	7.0239	7.0239	7.0239	7.0239
1647	15.964	3.34539	9.93753	3.32752
1648	17.3269	19.5501	12.4283	17.9915
1649	34.6585	10.7124	30.5212	10.5982
1650	27.3704	9.13335	6.27808	9.01544
1651	3.21773	6.64117	0.141806	6.33194
1652	40.1116	0	22.9947	0
1653	19.517	4.73404	13.4688	4.72012
1654	30.7694	11.9542	27.2083	11.7899
1655	12.8296	5.68514	9.63627	5.53554
1656	18.2439	13.5039	17.033	12.9874
1657	18.6557	15.6973	12.5748	15.3363
1658	32.2072	32.179	32.1749	32.1749
1659	26.3844	0	8.98233	0
1660	18.7527	6.72277	16.4124	6.65115
1661	21.5458	5.19583	14.5709	5.1415
1662	0	12.6067	0	12.5443
1663	21.7796	21.9145	1.16444	21.9036
1664	13.5634	8.57365	13.0025	8.48058
1665	40.5564	11.0949	27.5818	11.039
1666	21.19	7.34798	19.5833	6.77768
1667	21.0387	2.23777	18.2321	2.23777
1668	17.9873	19.4451	12.8787	19.4251
1669	24.4424	1.03536	9.74082	0.794034
1670	6.34447	17.9718	6.19751	17.8084
1671	10.099	0	6.34132	0
1672	17.8745	10.6096	9.42166	10.0888
1673	25.0943	10.735	16.2933	10.6178
1674	17.4833	21.6281	15.4457	21.4716
1675	11.1433	4.25451	5.91033	4.02051
1676	0.785651	0.785651	0.785651	0.785651
1677	32.2878	19.809	19.8066	19.8066
1678	9.65534	4.60184	7.70005	4.60184
1679	17.1357	1.30839	9.64739	1.26159
1680	19.785	19.7393	19.7393	19.7393
1681	29.9821	29.9821	29.9821	29.9821
1682	20.5276	10.9586	19.983	10.7896
1683	22.872	13.0207	17.5085	12.462
1684	23.4574	8.21855	14.1865	8.13898
1685	8.23317	1.97369	5.15904	1.34072
1686	0.137074	0	0	0
1687	24.0974	4.1575	22.4285	4.07218
1688	12.9379	0	0	0
1689	0.289875	0.00560746	0	0
1690	12.0207	5.39512	9.83172	4.90425
1691	21.681	12.5634	11.0881	12.0778
1692	21.9628	31.0476	21.9468	31.0374
1693	19.5734	25.1922	13.292	25.1723
1694	25.0956	6.74652	15.3404	6.58459
1695	26.2616	12.0488	16.9036	12.0488
1696	0.0658554	0.0658554	0.0658554	0.0658554
1697	18.1594	15.2553	11.9324	15.1462
1698	0.968288	0	0	0
1699	23.8626	0	13.0809	0
1700	19.1709	8.13618	11.7164	8.0974
1701	41.3471	17.4006	30.9629	17.4006
1702	29.661	0	0	0
1703	26.1773	39.6122	23.1667	37.3465
1704	25.3046	1.62006	24.6708	1.58327
1705	6.10115	0.00560746	0	0
1706	24.9357	4.02507	23.0749	3.59625
1707	13.6253	8.06338	0.00623375	7.94549
1708	52.7994	33.5563	0	33.5117
1709	12.3799	10.7536	8.13238	10.6362
1710	0.835125	0	0	0
1711	15.358	31.2175	5.16455	31.16
1712	0.105478	5.91403	0	5.55711
1713	30.0055	4.38858	15.7276	4.23772
1714	28.6413	13.3584	25.8233	13.3404
1715	56.6256	56.6256	56.6256	56.6256
1716	23.1674	10.3434	5.03144	10.2832
1717	0.205525	0.00560746	0	0
1718	20.6271	6.95573	12.7931	6.88851
1719	12.5059	21.0035	5.68342	20.9392
1720	18.5023	12.0504	17.3765	11.9297
1721	9.70611	4.54138	7.29834	4.16042
1722	9.18454	10.993	8.63769	10.4803
1723	21.9611	5.41343	17.8584	5.31529
1724	18.9	0	0	0
1725	33.9222	4.44657	18.9292	4.44657
1726	0.126518	0.126518	0.126518	0.126518
1727	19.8842	10.7878	16.9861	10.7407
1728	20.1595	10.3091	10.1158	10.1423
1729	18.9587	24.1434	14.0574	23.0687
1730	14.4409	21.8943	10.232	21.8181
1731	22.866	6.0855	20.8047	5.99766
1732	6.56522	5.11559	6.38716	5.01139
1733	6.09636	0	5.9516	0
1734	1.7962	4.42019	0	4.28697
1735	11.0151	6.734	6.73103	6.73103
1736	15.6164	7.17643	10.8797	6.82918
1737	0.173832	0.173832	0.173832	0.173832
1738	6.02802	8.37032	4.96946	8.15167
1739	22.6618	22.6618	22.6618	22.6618
1740	11.8282	6.80593	8.40394	6.71982
1741	26.0722	11.5546	21.9391	11.4918
1742	14.6399	22.3265	6.15028	22.1988
1743	10.6297	31.3393	4.87826	30.6635
1744	28.3418	28.3418	28.3418	28.3418
1745	20.9085	15.1973	10.9512	15.1931
1746	14.1512	4.94471	11.098	4.85501
1747	26.7186	27.7699	20.7028	27.7623
1748	12.4688	3.47636	9.31695	3.47636
1749	2.9345	2.88191	2.5798	2.48006
1750	0.339806	9.49572	0	9.03006
1751	21.98	8.31961	16.9423	7.97257
1752	0.0205506	9.20255	0	9.05691
1753	0.1171	7.37229	0.0420212	7.34781
1754	27.9209	7.13202	27.3922	7.11075
1755	20.1643	5.30254	15.6091	5.28864
1756	23.4395	18.9551	17.7792	18.8898
1757	35.7684	28.2009	30.3888	28.0869
1758	43.4094	40.5804	40.5804	40.5804
1759	20.172	9.15912	18.0942	8.70516
1760	17.6454	23.4408	16.354	23.435
1761	9.5738	0	8.14339	0
1762	29.9559	4.18751	22.4751	3.95309
1763	18.161	0.302546	3.76546	0
1764	4.08675	6.81998	2.29754	6.70614
1765	10.4892	19.6338	5.64818	19.1013
1766	5.89443	15.9876	3.01943	15.8271
1767	12.8113	6.21726	7.11089	6.11727
1768	15.5236	19.2101	12.1887	19.0901
1769	4.93393	0	2.53462	0
1770	35.5794	13.3603	8.64948	12.3822
1771	13.7462	9.52635	4.22507	9.27504
1772	19.9176	12.4675	14.6411	12.4597
1773	32.373	32.3286	32.3286	32.3286
1774	25.9972	2.07888	22.9526	1.96149
1775	11.192	0	4.13086	0
1776	22.443	0	0	0
1777	54.375	38.5933	43.4559	37.8837
1778	24.0021	11.8752	11.5368	11.8161
1779	17.7404	21.9531	0	21.9468
1780	19.6239	11.471	11.9523	11.0081
1781	25.7524	5.65577	24.5266	5.56625
1782	14.6772	14.4781	5.16606	14.3882
1783	0.0601984	8.33593	0	8.30451
1784	22.9897	22.9897	22.9897	22.9897
1785	18.6364	15.6737	6.44217	15.5999
1786	16.5894	16.7721	6.45627	16.6685
1787	12.1461	16.8843	5.91539	16.4615
1788	2.95979	0	1.42185	0
1789	13.4828	10.0079	10.2688	9.45202
1790	11.7452	11.6795	9.89815	11.1056
1791	11.147	0	3.06673	0
1792	23.8029	0	4.3577	0
1793	11.2502	9.0833	2.731	8.84474
1794	0.377963	0	0	0
1795	32.8047	11.0194	25.7938	10.9754
1796	0.14164	0.00560746	0	0
1797	5.42426	3.73362	1.51958	3.5373
1798	18.1143	5.63228	14.6079	5.28148
1799	13.7622	9.51415	11.727	9.31987
1800	17.8986	13.3796	7.51485	13.0407
1801	0.178542	0.00560746	0	0
1802	29.0736	8.50626	13.4451	8.50055
1803	0.0896507	0	0	0
1804	24.6794	11.8391	20.8737	11.5231
1805	9.08513	9.08513	9.08513	9.08513
1806	0.186327	0.00560746	0	0
1807	11.8743	1.74725	4.50516	1.74193
1808	22.1552	3.98332	20.0896	3.9017
1809	0.285348	7.24086	0	7.0023
1810	7.00215	24.3985	3.0316	22.3077
1811	26.0815	12.4279	20.3296	12.4279
1812	27.4477	27.4455	27.4334	27.4334
1813	19.6172	19.0556	11.0675	18.8167
1814	7.45119	9.42366	4.90744	9.02796
1815	0.222685	0	0	0
1816	22.6685	20.5708	21.3738	20.3836
1817	11.2968	6.54392	8.97759	6.15356
1818	1.93375	4.65773	0.602388	3.98544
1819	15.7465	12.8701	8.73705	12.6449
1820	39.3356	24.9	37.2801	24.8979
1821	0.133435	5.73898	0	4.77869
1822	0.176541	6.96655	0	6.04472
1823	14.3486	0	11.0957	0
1824	0.113103	0	0	0
1825	20.2068	2.11116	6.39813	2.11116
1826	19.9497	0.110875	16.3984	0.110875
1827	39.0614	39.0614	39.0614	39.0614
1828	24.0753	5.16854	16.9272	5.16854
1829	19.8059	18.1397	11.7306	17.8731
1830	30.0701	28.6702	29.9127	28.6073
1831	27.168	22.7796	11.9869	22.758
1832	14.6555	35.3095	12.3216	35.0842
1833	8.20824	0	0	0
1834	30.9155	41.634	0.642533	41.054
1835	17.0325	0.891406	13.342	0.891406
1836	22.1515	0	10.7711	0
1837	45.5403	36.5668	45.2856	36.5668
1838	0.0877125	0	0	0
1839	19.5604	12.6327	18.2557	12.0187
1840	17.6422	14.3886	14.0887	13.6611
1841	19.4317	15.0251	16.0409	14.9755
1842	0.219167	0	0	0
1843	0.00560746	0.00560746	0.00332646	0.00332646
1844	12.993	17.3117	6.62389	17.2648
1845	29.1466	15.439	13.0607	15.179
1846	0.00560746	0.00560746	0.00389671	0.00389671
1847	15.9422	1.99332	4.60082	1.98325
1848	13.3112	2.59299	9.53738	2.49917
1849	2.9439	2.9439	2.9439	2.9439
1850	12.5869	12.2777	12.2777	12.2777
1851	4.45524	0	2.2615	0
1852	0.129462	0	0	0
1853	17.9622	8.81427	15.2864	8.34552
1854	0	11.2088	0	11.1928
1855	27.2243	3.02074	20.5636	2.04837
1856	36.849	30.2881	14.9242	28.9463
1857	20.5864	0.0957986	2.59704	0.0957986
1858	16.6259	13.6092	13.6092	13.6092
1859	23.869	2.22592	11.5067	2.22069
1860	0.476467	0.650492	0	0.609479
1861	14.2666	4.77863	13.0044	4.63658
1862	27.6928	26.8093	0	26.3564
1863	5.74258	14.4398	5.64484	14.3968
1864	16.5807	6.2076	11.7457	6.15976
1865	20.9079	36.2217	19.0247	36.1956
1866	11.8017	14.9593	11.3734	14.5303
1867	0.176301	7.09508	0	6.87048
1868	9.47878	9.84479	8.17374	9.84479
1869	11.9736	4.5583	11.0188	4.5583
1870	0.587562	8.27614	0	8.15897
1871	7.57459	4.94351	4.84876	4.84876
1872	0.418609	0	0	0
1873	11.9863	8.28159	8.66723	8.24471
1874	15.6425	12.9026	12.9026	12.9026
1875	14.2193	8.03221	8.76266	7.90841
1876	0.250805	0	0	0
1877	47.045	47.045	47.045	47.045
1878	19.5546	10.7225	17.6685	10.5997
1879	4.14149	7.53653	0.50676	7.31981
1880	1.23103	12.5147	0.799867	11.7787
1881	32.862	0	6.68629	0
1882	12.0214	13.2993	9.81605	13.1598
1883	10.1613	1.9939	3.73136	1.91843
1884	14.4855	14.3049	14.2343	14.2343
1885	21.0842	9.07315	14.2316	8.77543
1886	20.4684	16.7544	13.4765	16.2891
1887	0.171681	0	0	0
1888	22.2356	40.1554	15.4825	40.1554
1889	13.2957	19.9438	7.16605	19.9063
1890	18.0864	18.0809	14.0196	17.3938
1891	21.822	4.40981	19.5636	4.34577
1892	19.2337	23.8507	18.0633	23.6976
1893	8.38961	12.2273	7.62719	12.0141
1894	4.28725	7.10518	0.0990215	6.68086
1895	20.1934	10.2272	16.0576	10.1158
1896	8.02538	8.02538	8.02538	8.02538
1897	14.722	10.4391	10.6281	10.2526
1898	19.5734	0	9.80761	0
1899	12.5262	8.46008	10.0323	8.07679
1900	21.9924	6.73256	17.0921	6.72867
1901	14.897	11.2853	8.80233	11.2463
1902	0.143985	12.2242	0	12.1685
1903	23.3739	41.8006	17.5501	41.5315
1904	7.42468	28.2408	0	28.1491
1905	37.4378	20.5628	24.9303	20.5442
1906	16.3766	4.26822	3.90729	3.55887
1907	19.1837	7.54105	17.2475	7.50969
1908	15.4327	1.16838	6.50843	1.03412
1909	10.8067	0	0	0
1910	19.1602	20.032	13.5937	19.983
1911	13.6848	10.2896	9.01778	10.2124
1912	23.3677	4.0567	14.0751	3.87711
1913	10.2649	9.00925	8.92346	8.97084
1914	24.997	0	18.4681	0
1915	0.130239	0	0	0
1916	5.47417	0.845585	0	0.737013
1917	5.29986	5.29986	5.29986	5.29986
1918	14.5442	14.3789	5.01952	14.2634
1919	0.148862	35.7095	0	35.3498
1920	0	13.6374	0	13.4487
1921	15.8756	28.838	15.0783	28.4295
1922	4.81272	11.3682	1.69409	11.3425
1923	12.6077	2.25792	8.46205	2.25792
1924	0.0996605	0	0	0
1925	15.8628	16.0345	5.18654	15.4663
1926	43.1891	43.1882	43.1879	43.1879
1927	15.7551	3.77559	13.7656	3.5195
1928	23.0948	23.0562	23.0414	23.0414
1929	16.2022	2.2366	0	2.18579
1930	16.187	16.187	16.187	16.187
1931	16.3029	17.4885	7.70585	17.3451
1932	0.263884	0	0	0
1933	0.19731	0	0	0
1934	23.279	31.6528	15.0146	31.0021
1935	22.2894	13.5516	13.9646	13.5516
1936	7.27848	0	6.74763	0
1937	3.72049	22.0085	0	21.6978
1938	20.5675	9.16395	0	9.0833
1939	21.5001	7.14563	11.5914	6.41498
1940	23.6356	4.28476	12.4743	4.19563
1941	39.712	38.7625	38.7625	38.7625
1942	12.2858	10.7308	7.0724	10.579
1943	0.172337	18.3793	0	18.0844
1944	16.2277	15.7634	13.3586	15.7329
1945	23.5636	15.0619	19.4653	14.6452
1946	3.81735	0	2.55005	0
1947	13.4081	1.89733	7.63866	1.74144
1948	10.818	8.4119	0	8.2037
1949	47.3528	47.352	47.2219	47.2219
1950	36.9327	0	33.5117	0
1951	15.2361	0	9.67985	0
1952	34.4384	0	0	0
1953	34.9957	15.466	0	15.4217
1954	2.55702	5.37698	0	5.35817
1955	0.0853573	0.0128904	0.0128904	0.0128904
1956	20.6147	13.5649	20.3836	13.3817
1957	0.966527	1.29558	0	1.11899
1958	13.1769	12.0654	7.82598	11.3848
1959	8.40762	0	0	0
1960	14.856	8.48763	13.3875	8.46877
1961	23.2121	2.80727	18.4072	2.7883
1962	0.177379	6.50245	0	6.28076
1963	12.7984	17.9083	12.4434	17.6768
1964	0.126701	2.98805	0	2.44988
1965	0.107222	0.107222	0.107222	0.107222
1966	21.9786	29.309	20.2807	29.282
1967	0.0696088	0.195285	0	0
1968	21.7123	14.0671	21.0919	13.9729
1969	16.4641	18.7599	14.6551	18.6651
1970	14.4967	22.3362	6.99659	21.8592
1971	7.70068	28.7697	0	28.6041
1972	39.3253	39.3253	39.3253	39.3253
1973	12.9324	1.32208	9.78279	1.31571
1974	26.4577	4.48676	10.2792	4.4691
1975	7.91096	1.84492	1.99792	1.39558
1976	4.60356	7.21926	0	6.05669
1977	16.5432	0	6.26441	0
1978	9.69019	4.4282	4.72551	4.02675
1979	13.9093	7.38551	9.94816	7.17214
1980	6.44088	20.782	2.3023	20.6724
1981	13.9832	15.358	0	15.2213
1982	19.6106	19.2979	17.2497	19.228
1983	11.8591	5.78941	10.2358	5.45676
1984	26.2955	26.2955	26.2955	26.2955
1985	27.8957	27.8957	27.8957	27.8957
1986	17.3959	0	0	0
1987	44.9933	44.2991	33.7706	44.2991
1988	0.0447104	9.22643	0	9.07061
1989	1.2622	4.97377	0	4.02386
1990	27.0775	27.0775	27.0775	27.0775
1991	5.80034	0	5.54864	0
1992	1.2343	0	0	0
1993	4.37014	3.07069	0	3.02625
1994	14.4507	7.67981	14.1723	7.51482
1995	0.172848	3.14472	0	3.06059
1996	0.0538961	3.76709	0	3.41676
1997	0.0756618	0.00560746	0	0
1998	16.3014	5.51677	11.8428	5.4167
[truncated: 193 more rows]
